# Supplementary material for: Global Nitrous Oxide Budget 1980–2020
Source: Copernicus journal article supplement (doi:10.5194/essd-2023-401), 2023-10-09
Supplement: Supplementary file 1 [file essd-2023-401-supplement-version3.pdf]

- 1 *Supplementary Information of*
- 2 **Global Nitrous Oxide Budget 1980-2020**
- 3 **Hanqin Tian et al.**
- 4 *Correspondence to:* Hanqin Tian ([hanqin.tian@bc.edu](mailto:hanqin.tian@bc.edu))

5 **Extended methodology**

6  
7 **SI-1 NMIP-2: global Nitrogen/N<sub>2</sub>O Model Inter-comparison Project phase 2**

8  
9 The NMIP2 is a follow-up model intercomparison project of NMIP (*Tian et al.*, 2018), which provides  
10 estimates of N<sub>2</sub>O emissions from natural and agricultural soils and covers the time period 1850-2020. Eight  
11 process-based Terrestrial Biosphere Models (TBMs) participate in NMIP-2. In general, N<sub>2</sub>O emissions  
12 from soil are regulated at two levels, which are the rates of nitrification and denitrification in the soil and  
13 soil physical factors regulating the ratio of N<sub>2</sub>O to other nitrous gases (*Davidson et al.*, 2000). For N input  
14 to land ecosystems, all eight models considered N fertilizer use, atmospheric N deposition and biological  
15 fixation, but five models considered manure as N input. For vegetation processes, all models included  
16 dynamic algorithms in simulating N allocation to different living tissues and vegetation N turnover, and  
17 simulated plant N uptake using the “Demand and Supply-driven” approach. For soil N processes, all eight  
18 models simulated N leaching according to water runoff rate; however, models are different in representing  
19 nitrification and denitrification processes and the impacts of soil chemical and physical factors. The  
20 differences in simulating nitrification and denitrification processes are one of the major uncertainties in  
21 estimating N<sub>2</sub>O emissions. Model characteristics in simulating major N cycling processes associated with  
22 N<sub>2</sub>O emissions in each participating model are briefly described in Table SI-1.  
23  
24

**Table SI-1. Model characteristics in simulating major N cycling processes**

|                                         | CLASS IC                      | DLEM                           | ELM                          | ISAM                          | LPX-Bern                     | O-CN                             | ORCHIDEE                              | VISIT                    |
|-----------------------------------------|-------------------------------|--------------------------------|------------------------------|-------------------------------|------------------------------|----------------------------------|---------------------------------------|--------------------------|
| Open C cycle <sup>a</sup>               | Yes                           | Yes                            | Yes                          | Yes                           | Yes                          | Yes                              | Yes                                   | Yes                      |
| C-N coupling                            | Yes                           | Yes                            | Yes                          | Yes                           | Yes                          | Yes                              | Yes                                   | Yes                      |
| N pools <sup>b</sup>                    | (3, 1, 3)                     | (6,6,8)                        | (6,4,5)                      | (6,4,4)                       | (4,3,8)                      | (9,6,9)                          | (9,6,9)                               | (4,1,4)                  |
| Demand and supply-driven plant N uptake | Yes                           | Yes                            | Yes                          | Yes                           | Yes                          | Yes                              | Yes                                   | Yes                      |
| N allocation <sup>c</sup>               | Dynamic                       | Dynamic                        | Dynamic                      | Dynamic                       | Dynamic                      | Dynamic                          | Dynamic                               | Dynamic                  |
| Nitrification                           | $f(T, SWC, C_{NH4})$          | $f(T, SWC, C_{NH4})$           | $f(T, SWC, pH, rh, C_{NH4})$ | $f(T, SWC, C_{NH4})$          | $f(T, SWC, C_{NH4})$         | $f(T, SWC, pH, C_{NH4})$         | $f(T, SWC, pH, C_{NH4})$              | $f(T, SWC, pH, C_{NH4})$ |
| Denitrification                         | $f(T, SWC, C_{NO3})$          | $f(T, SWC, clay, rh, C_{NO3})$ | $f(T, SWC, pH, rh, C_{NO3})$ | $f(T, SWC, C_{NO3})$          | $f(T, SWC, R_{mb}, C_{NO3})$ | $f(T, SWC, pH, R_{mb}, C_{NO3})$ | $f(T, SWC, pH, denitrifier, C_{NO3})$ | $f(SWC, rh, C_{NO3})$    |
| Mineralization, immobilization          | $f(C:N)$                      | $f(C:N)$                       | $f(C:N)$                     | $f(C:N)$                      | $f(C:N)$                     | $f(C:N)$                         | $f(C:N)$                              | $f(C:N)$                 |
| N leaching                              | $f(runoff, C_{NO3}, C_{NH4})$ | $f(runoff, C_{NO3}, C_{NH4})$  | $f(runoff, C_{NO3})$         | $f(runoff, C_{NO3}, C_{NH4})$ | $f(runoff, C_{NO3})$         | $f(runoff, C_{NO3}, C_{NH4})$    | $f(runoff, C_{NO3}, C_{NH4})$         | $f(runoff, C_{NO3})$     |
| NH <sub>3</sub> volatilization          | $f(C_{NH3})$                  | $f(T, SWC, C_{NH3})$           | No                           | $f(C_{NH3})$                  | $f(T, SWC, C_{NH3})$         | $f(C_{NH3})$                     | $f(SWC, pH, C_{NH4})$                 | $f(T, SWC, C_{NH3})$     |

|                               |                | $pH,$<br>$C_{NH4}$                           |                  |          | $pH,$<br>$C_{NH4}$            |                |         | $pH,$<br>$C_{NH4}$ |
|-------------------------------|----------------|----------------------------------------------|------------------|----------|-------------------------------|----------------|---------|--------------------|
| Plant N turnover <sup>d</sup> | Dynamic        | Dynamic                                      | Dynamic          | Dynamic  | Dynamic                       | Dynamic        | Dynamic | Dynamic            |
| N resorption                  | Fixed          | $f(C:N)$                                     | Fixed            | $f(C:N)$ | Fixed                         | Fixed          | Fixed   | Fixed              |
| N fixation                    | $f(N_{limit})$ | $f(T,$<br>$SWC,$<br>$C_{NH4},$<br>$C_{NO3})$ | $f(T,$<br>$C:N)$ | $f(ET)$  | Implied<br>by mass<br>balance | $f(N_{limit})$ | Fixed   | $f(ET)$            |
| N fertilizer use              | Yes            | Yes                                          | Yes              | Yes      | Yes                           | Yes            | Yes     | Yes                |
| Manure N use                  | No             | Yes                                          | No               | Yes      | No                            | Yes            | Yes     | Yes                |
| N deposition                  | Yes            | Yes                                          | Yes              | Yes      | Yes                           | Yes            | Yes     | Yes                |

25 <sup>a</sup> “Open” denotes that excess N can be leached from the system.

26 <sup>b</sup> Numbers of N pools (vegetation pools, litter pools, soil pools).

27 <sup>c</sup> Dynamic denotes time-varied N allocation ratio to different N pools.

28 *T*: soil temperature, *SWC*: soil water content, *clay*: soil clay fraction, *ET*: evapotranspiration, *denitrifier*:  
29 soil denitrifier biomass, *rh*: soil heterogeneous respiration, *Nlimit*: N limitation of vegetation growth,  
30  $C_{NO3}$ : soil  $NO_3^-$  content,  $C_{NH4}$ : soil  $NH_4^+$  content.

31  
32 All NMIP2 models are driven by consistent input datasets (i.e., climate, atmospheric CO<sub>2</sub> concentration,  
33 land cover change, irrigation, atmospheric N deposition, mineral N fertilization, and manure N application  
34 and deposition) and implemented consistent simulation experiments (SH0 – SH12; Table A4). Nitrogen  
35 inputs data used in NMIP2 simulations are from History of anthropogenic Nitrogen inputs (HaNi) dataset  
36 (*Tian et al.*, 2022), which takes advantage of different data sources in a spatiotemporally consistent way to  
37 generate a set of high-resolution (5 arcminutes) gridded N input products from 1850 to 2020. HaNi data set  
38 shows that the total anthropogenic N inputs to global terrestrial ecosystems increased from 29.05 Tg N yr<sup>-1</sup>  
39 in the 1860s to 267.23 Tg N yr<sup>-1</sup> in the 2010s, with the dominant N source changing from atmospheric N  
40 deposition (before the 1900s) to manure N (the 1910s-2000s), and to synthetic fertilizer in the 2010s (Fig.  
41 B3). The climate data used to run historical simulations is the half degree CRU-JRA2.2 6-hourly forcing  
42 over 1901- 2020 (<https://catalogue.ceda.ac.uk/uuid/4bdf41fc10af4caa489b14745c665a6>). Annual CO<sub>2</sub>  
43 concentration during 1850-2020 were derived from ice core CO<sub>2</sub> data and NOAA annual  
44 observations(<https://www.esrl.noaa.gov>). Historical distribution of cropland, pasture, rangeland and  
45 irrigation during 1850-2020 were from Land-Use Harmonization 2 (LUH2) dataset (*Hurt et al.*, 2020). The  
46 original dataset of LUH2 is at a resolution of 0.25° x 0.25° longitude/latitude. We aggregated all geo-  
47 referenced input data into a consistent spatial resolution of 0.5° x 0.5° longitude/latitude to run NMIP2  
48 models.

49  
50 NMIP2 models perform a subset of 13 simulations (SH0-SH12) to quantify N<sub>2</sub>O emissions from both  
51 agricultural and natural soils during the study period, and to disentangle the effects of multiple  
52 environmental factors on soil N<sub>2</sub>O emissions. The SH1 results were taken as the “best estimates” of soil  
53 N<sub>2</sub>O emissions because they include the effects of all driving factors that models can take into account. In  
54 the SH0 simulation, driving forces were kept constant at the level in 1850 over the entire simulation period  
55 (1850-2020). According to previous N<sub>2</sub>O budget studies, atmospheric N<sub>2</sub>O growth rate and Monte-Carlo  
56 method, we suggest the following criteria for the N<sub>2</sub>O budget inclusion (Table A6), and the criteria for  
57 carbon components are consistent with TRENDY. By comparing results from factorial simulation  
58 experiments (SH0 - SH12), we attribute changes in soil N<sub>2</sub>O emissions to seven natural and anthropogenic  
59 factors, namely, climate (CLIM, including precipitation, humidity, temperature and photosynthetic active  
60 radiation changes), atmospheric CO<sub>2</sub> concentration (CO<sub>2</sub>), land cover change (LCC), irrigation (IRRI),

61 atmospheric N deposition (NDEP), mineral N fertilizer use (NFER), and manure N use in cropland  
 62 (MANN). In order to understand soil N<sub>2</sub>O emissions dynamics caused by crop cultivation, we further  
 63 separate the global and regional N<sub>2</sub>O emissions into those derived from cropland soils and those from soils  
 64 of other land ecosystems. In this study, we attribute the impact of a single factor on cropland N<sub>2</sub>O emissions.  
 65 Five models (DLEM, ISAM, O-CN, ORCHIDEE, and VISIT) considered the effects of manure N  
 66 application in cropland, therefore, we use these five models' results to calculate the manure N effect (SH1-  
 67 SH2). Meanwhile, we used results from all the eight models (i.e., CLASSIC, DLEM, ELM, ISAM, LPX-  
 68 Bern, O-CN, ORCHIDEE, and VISIT) to calculate the effects of synthetic N fertilizer use (SH1-SH3) and  
 69 atmospheric N deposition (SH1-SH4). The effect of N deposition in natural ecosystems (SH1-SH4) and the  
 70 effects of CO<sub>2</sub> (SH1-SH7) and climate (SH1-SH8) on global terrestrial ecosystems are calculated from the  
 71 eight NMIP2 models mentioned above.

72  
73  
74

**Table SI-2. Criteria for the N<sub>2</sub>O budget inclusion**

| Carbon criteria                                                                                                                                                                                                                              | N <sub>2</sub> O criteria                                                                                                                                                                                                                                                                                                                                                                                                                                                                                                                                                                                                                     |
|----------------------------------------------------------------------------------------------------------------------------------------------------------------------------------------------------------------------------------------------|-----------------------------------------------------------------------------------------------------------------------------------------------------------------------------------------------------------------------------------------------------------------------------------------------------------------------------------------------------------------------------------------------------------------------------------------------------------------------------------------------------------------------------------------------------------------------------------------------------------------------------------------------|
| (1) Steady state after spin-up, diagnosed from SH0 run: steady-state defined as an offset < 0.10 PgC yr <sup>-1</sup> , drift < 0.05 PgC yr <sup>-1</sup> per century (i.e. first is the average over 1850-2020, second is the slope x 100). | (1) Steady state after spin-up, diagnosed from SH0 run: drift < 0.2 Tg N <sub>2</sub> O-N yr <sup>-1</sup> per century (i.e. the slope x 100).                                                                                                                                                                                                                                                                                                                                                                                                                                                                                                |
| (2) Net annual land flux is a carbon sink over the 1990s and 2000s as constrained by global atmospheric and oceanic observations (Keeling & Manning, 2014), diagnosed from SH3 run.                                                          | (2) Inside the present-day (2007-2016) land emission range: 7-13 Tg N <sub>2</sub> O-N yr <sup>-1</sup> , diagnosed from SH1 run. The upper limit was calculated using the maximum total N <sub>2</sub> O emissions minus the minimum estimates of other sources, and the lower limit was calculated using the minimum total N <sub>2</sub> O emissions minus the maximum estimates of other sources. The range of total emissions was estimated by a one-box model using atmospheric N <sub>2</sub> O growth rate, and the range of the sum of other sources was calculated by a Monte-Carlo method using estimates from Tian et al. (2020). |
|                                                                                                                                                                                                                                              | (3) Inside the pre-industrial land emission range: 3 to 9 Tg N <sub>2</sub> O-N yr <sup>-1</sup> , diagnosed from SH1 run. This range is derived from the pre-industrial atmospheric burden/N <sub>2</sub> O lifetime minus ocean and river/ coastal/estuary emissions (Michael J. Prather et al., 2015).                                                                                                                                                                                                                                                                                                                                     |

75  
76  
77

**Brief description of algorithms associated with N<sub>2</sub>O flux in each NMIP2 model:**

**1: CLASSIC**

79 The representation of nitrogen cycling in CLASSIC is described in *Asaadi and Arora (2021)* and *Kou*  
 80 *Giesbrecht and Arora (2022)*. N<sub>2</sub>O production due to both nitrification and denitrification are represented.  
 81 N<sub>2</sub>O loss during nitrification ( $I_{N_2O}$ ; g N m<sup>-2</sup> d<sup>-1</sup>) is represented with the following equation:

$$82 \quad I_{N_2O} = \eta_{N_2O} f_I(T_{0.5}) f_I(\psi) N_{NH_4} \quad (1)$$

83  $\eta_{N_2O}$  is a coefficient (d<sup>-1</sup>),  $f_I(T_{0.5})$  is a dimensionless scalar that depends on soil temperature averaged over  
 84 the top 0.5m soil depth ( $T_{0.5}$ ),  $f_I(\psi)$  is a dimensionless scalar that depends on soil matric potential ( $\psi$ ), and  
 85  $N_{NH_4}$  is the soil ammonium pool (g N m<sup>-2</sup>).

86 N<sub>2</sub>O loss during denitrification ( $E_{N_2O}$ ; g N m<sup>-2</sup> d<sup>-1</sup>) is represented with the following equation:

$$87 E_{N_2O} = \mu_{N_2O} f_E(T_{0.5}) f_E(\theta) N_{NO_3} \quad (2)$$

88  $\mu_{N_2O}$  is a coefficient (d<sup>-1</sup>),  $f_E(T_{0.5})$  is a dimensionless scalar that depends on soil temperature averaged over  
89 the top 0.5m soil depth ( $T_{0.5}$ ),  $f_E(\theta)$  is a dimensionless scalar that depends on soil moisture ( $\theta$ ), and  $N_{NO_3}$   
90 is the soil nitrate pool (g N m<sup>-2</sup>).

91

## 92 2: DLEM

93 The nitrogen cycle scheme in DLEM2.0 (Xu et al., 2017; Yang et al., 2015; Tian et al. 2020) are similar as  
94 DLEM1.0 (Lu and Tian, 2013; Tian et al., 2012b; Tian et al., 2010; Tian et al., 2011; Xu et al., 2011),  
95 However, the N<sub>2</sub>O emission schemes in DLEM2.0 (Xu et al., 2017) have been modified based on Chatskikh  
96 et al. (2005) and Heinen (2006).

97

$$98 R_{nit} = k_{nit\_max} f(T1) f(WFPS) C_{NH_4} \quad (3)$$

99

$$100 R_{den} = k_{den\_max} f(T2) f(WFPS) C_{NO_3} \quad (4)$$

101

102 where  $R_{nit}$  is the daily nitrification rate (g N/m<sup>2</sup>/d);  $R_{den}$  is the daily denitrification rate (g N/m<sup>2</sup>/d);  
103  $f(T1)$  and  $f(T2)$  are the impact function of daily soil temperature on nitrification and denitrification,  
104 respectively;  $f(WFPS)$  is the impact function of water-filled pore space (WFPS) on nitrification,  
105 denitrification and N<sub>2</sub>O diffusion;  $k_{nit\_max}$  is the maximum fraction of NH<sub>4</sub><sup>+</sup>-N that is converted to NO<sub>3</sub><sup>-</sup>-  
106 N or gases (0-1);  $k_{den\_max}$  is the maximum fraction of NO<sub>3</sub><sup>-</sup>-N that is converted to gases (0-1);  $C_{NH_4}$  and  
107  $C_{NO_3}$  are the soil NH<sub>4</sub><sup>+</sup>-N and NO<sub>3</sub><sup>-</sup>-N content (g N/m<sup>2</sup>). N<sub>2</sub>O from denitrification and nitrification processes  
108 are calculated as,

109

$$110 R_{N_2O} = (R_{nit} + R_{den}) f(T3) (1 - f(WFPS)) \quad (5)$$

111

112 where  $R_{N_2O}$  is the daily N<sub>2</sub>O emission rate (g N/m<sup>2</sup>/d);  $f(T3)$  is the impact function of daily soil  
113 temperature on N<sub>2</sub>O diffusion rate from soil pores. The calculation methods for these functions and  
114 parameters were described in detail in Xu et al. (2017) and Yang et al. (2015).

115

## 116 3: ELM

117 The nitrogen dynamics in ELM is simulated based on the theory of equilibrium chemistry approximation  
118 (Zhu et al., 2016). Plants, soil microbes, and abiotic factors such as mineral surfaces coexist in the same  
119 soil environment and vie for a diverse array of nutrients, including NH<sub>4</sub><sup>+</sup>, NO<sub>3</sub><sup>-</sup>. Due to the limited  
120 availability of these nutrients, intense competitive interactions are expected. The competition of those  
121 limited resources is represented by consumer–substrate networks, therefore, the uptake of nutrient substrate  
122 by each consumer is dependent on the relative competitiveness of one consumer over the others. Nutrient  
123 consumers' competitiveness is parametrized with kinetic parameters (Zhu et al., 2016). As a result, neither  
124 plant nor soil microbes get the first priority to access nutrient substrates. Instead, when the potential nutrient  
125 demands (from all nutrient consumers) exceed the supply at a given time step, the allocation of limited  
126 nutrients among the consumers affects their performance (e.g., plant growth, soil organic matter  
127 accumulation, nitrification, denitrification rates). ELM adopts a multiple-consumer-multiple-substrate  
128 competition network (Zhu et al., 2016; Zhu et al., 2019) to simulate (1) nitrogen uptake facilitated by  
129 nitrogen carrier enzymes, (2) binding of a nutrient substrate to a particular enzyme precludes it from  
130 attaching to other enzymes, and (3) rates and affinities of consumers for different substrates. After the  
131 nutrient competition has been resolved, scaling terms ( $f(ECA_{nit})$  and  $f(ECA_{den})$ ) will be applied to the  
132 potential nitrification and denitrification processes:

133

$$134 R_{nit} = k_{nit\_max} f(\theta) f(T) (1 - f(O)) f(ECA_{nit}) C_{NH_4} \quad (6)$$

135  
136  $R_{den} = \min(f(deomp), f(C_{NO3}))f(ECA_{den})$  (7)  
137

138 where  $k_{nit,max}$  is the maximum nitrification rate,  $f(\theta)$ ,  $f(T)$ ,  $f(O)$  are soil moisture, temperature, and  
139 oxygen scalars, respectively.  $f(deomp)$  and  $f(C_{NO3})$  are carbon limited and NO<sub>3</sub>- limited denitrification  
140 rates (Del Grosso *et al.*, 2000).  
141

#### 142 4: ISAM

143 ISAM model contains detailed calculations of the terrestrial ecosystem's organic and mineral N cycle (Yang  
144 *et al.*, 2009). The major N processes in ISAM include biological fixation, leaching, mineralization and  
145 immobilization, plant uptake, nitrification, and denitrification. The soil biogeochemistry module of ISAM  
146 shares the same ten soil layers (to 3.5 m depth) as the soil biogeophysics and calculates the vertical transport  
147 of SOC and N (Shu *et al.*, 2020; Yang *et al.*, 2009). N<sub>2</sub>O emission in ISAM N<sub>2</sub>O is produced as a byproduct  
148 of nitrification and denitrification (Xu *et al.*, 2021). N<sub>2</sub>O module explicitly accounts for the vertical transport  
149 of C, N, and O<sub>2</sub> within every soil layer for both saturated and unsaturated soil conditions by accounting for  
150 the process of oxygen diffusing into the soil from the atmosphere and the soil oxygen supply. The model  
151 also explicitly accounts for the effects of anoxic and oxic environments on nitrification (N<sub>ni</sub>, Eq. 6) and  
152 denitrification (N<sub>de</sub>, Eq. 7). Both environments are calculated based on the fraction of anoxic soil depending  
153 on soil O<sub>2</sub> concentration, which is non-linearly correlated with the chemical pathways forming N<sub>2</sub>O.  
154

155  $N_{ni} = NH_4^+ \times (1 - e^{-F_{te,m} \times F_{sm,m} \times r_{ni}}) \times F_{pH,m,ni} \times R_d$  (8)  
156

157  $N_{de} = NO_3^- \times r_{de} \times Rh \times F_{pH,m,de} \times R_d$  (9)  
158

159 where  $NH_4^+$  and  $NO_3^-$  are ammonium and nitrate pool sizes;  $F_{te,m}$  is temperature modifier;  $F_{sm,m}$  is soil  
160 moisture modifier;  $r_{ni}$  and  $r_{de}$  are base nitrification and denitrification rates;  $F_{pH,m,ni}$  and  $F_{pH,m,de}$  are pH  
161 modifiers for nitrification and denitrification;  $R_d$  is relative soil anoxic fraction;  $Rh (= 1 - R_d)$  is heterotrophic  
162 respiration.  
163

164 Under anoxic soil conditions, N<sub>2</sub>O is produced through denitrification, while under oxic soil conditions,  
165 more N<sub>2</sub>O is produced from nitrification. The model accounts for soil NH<sub>4</sub><sup>+</sup> volatilization at the soil surface  
166 when NH<sub>4</sub><sup>+</sup> in NH<sub>4</sub><sup>+</sup>-containing fertilizers (e.g., urea) is converted to ammonia gas, depending upon pH  
167 (Huang and Gerber, 2015). The soil NH<sub>4</sub><sup>+</sup> volatilization in the model is also affected by the anoxic  
168 condition, which increases under a higher temperature and relatively lesser soil anoxic condition. The model  
169 accounts for the impacts of pH on nitrification, denitrification, and volatilization rates (Li *et al.*, 2000; Xu-  
170 Ri and Prentice, 2008). We prescribe the soil pH from the Global Soil Dataset for Earth System Modeling  
171 dataset (GSDE) (Shangguan *et al.*, 2014).  
172

#### 173 5: LPX-Bern

174 The implementation of nitrogen dynamics in LPX-Bern is based on the work of Xu-Ri and Prentice (2008).  
175 Nitrogen uptake by plants is governed by their demand and the availability of nitrogen in two soil pools  
176 representing ammonium and nitrate. Nitrogen from deposition and fertilization are added to these inorganic  
177 soil pools. Losses include ammonium volatilization, nitrate leaching as well as N<sub>2</sub>O and NO production  
178 during nitrification and N<sub>2</sub>O, NO and N<sub>2</sub> production during denitrification. Aerobic nitrification of  
179 ammonium is dependent on soil temperature ( $T_{soil}$ ) and indirectly on soil water content due to the  
180 partitioning of wet and dry soil:  
181

182  $R_{nit} = \max_{nit} f_1(T_{soil}) C_{NH4,dry}$  (10)  
183

184 where  $max_{nit} = 0.92 \text{ day}^{-1}$  is the daily maximum nitrification rate at 20°C.  
 185 Anaerobic denitrification of nitrate in wet soil depends on labile carbon availability and soil temperature:

$$186 \quad R_{den} = R_{mb}/(R_{mb} + K_{mb})f_2(T_{soil})C_{NO3,wet}/(C_{NO3,wet} + K_n) \quad (11)$$

188  
 189 The parameters  $K_{mb}$  and  $K_n$  are taken from *Xu-Ri and Prentice* (2008) and  $R_{mb}$  is the microbiological soil  
 190 respiration. The amount of nitrogen lost as N<sub>2</sub>O due to nitrification and denitrification is modelled as a  
 191 function of soil temperature, water content and the respective process rate.

## 192 6: O-CN

194 The treatment of inorganic soil nitrogen dynamics in O-CN follows largely *Xu-Ri and Prentice* (2008). O-  
 195 CN (*Zaehle and Friend*, 2010) considers N losses to NH<sub>3</sub> volatilisation, NO<sub>x</sub>, N<sub>2</sub>O and N<sub>2</sub> production and  
 196 emission, as well as NH<sub>4</sub> and NO<sub>3</sub> leaching. Inorganic nitrogen dynamics in the soil are tightly coupled to  
 197 plant uptake and net mineralization. The anaerobic volume fraction of the soil is estimated by an empirical  
 198 function of the fractional soil moisture content (*Zaehle et al.*, 2011). The fraction of ammonium in the  
 199 aerobic part of the soil is subject to nitrification, according to:

$$200 \quad R_{nit} = v_{max_{nit}}f(T1)f(pH1)C_{NH4} \quad (12)$$

202  
 203 where  $f(pH1)$  is the soil pH response functions for nitrification (*Li et al.*, 1992; *Xu-Ri and Prentice*, 2008),  
 204 and  $v_{max_{nit}}$  is the maximum daily nitrification rate under 20°C and favourable pH conditions (*Xu-Ri and*  
 205 *Prentice*, 2008).

206  
 207 Gross denitrification of the fraction of nitrate under anoxic conditions is modelled as:

$$208 \quad R_{den} = R_{mb}/(R_{mb} + K_{mb})f(T2)f(pH2)C_{NO3}/(C_{NO3} + K_n) \quad (13)$$

210  
 211 where  $f(pH2)$  is the soil pH response functions for denitrification (*Li et al.*, 1992; *Xu-Ri and Prentice*, 2008),  
 212  $R_{mb}$  is the soil microbial respiration rate, and  $K_{mb}$  and  $K_n$  parameters taken from *Li et al.* (1992).

213  
 214 The N<sub>2</sub>O production from nitrification and denitrification is then calculated as:

$$215 \quad R_{N2O} = a_{nit}f(T1)R_{nit} + b_{den}f(T2)f(pH3)R_{den} \quad (14)$$

217  
 218 where  $a_{nit}$  and  $b_{den}$  are fraction loss constants,  $f(pH3)$  is a pH-modifier changing the degree of denitrification  
 219 producing N<sub>2</sub>O versus NO<sub>x</sub> or N<sub>2</sub> (*Zaehle et al.*, 2011). Emissions of volatile compounds are simulated  
 220 using the empirical emission of *Xu-Ri and Prentice* (2008).

## 221 7: ORCHIDEE

223 Modeling of the mineral N dynamics by the ORCHIDEE model originates from the formulations used in  
 224 the O-CN (*Zaehle and Friend*, 2010). It is composed of five pools for ammonium/ammoniac, nitrate, NO<sub>x</sub>,  
 225 nitrous oxide, and di-nitrogen forms. N<sub>2</sub>O production in both nitrification and denitrification processes are  
 226 represented.

227  
 228 The potential daily rate of nitrification,  $R_{nit}$ , occurs only on the aerobic fraction of the soil and is a function  
 229 of temperature, pH, and ammonium concentration ( $C_{NH4}$ ):

$$230 \quad R_{nit} = (1 - f(WFPS))f(T1)f(pH1)k_{nit}C_{NH4} \quad (15)$$

232  
 233 where  $k_{nit}$  is the reference potential NO<sub>3</sub><sup>-</sup> production per mass unit of ammonium.

234  
235

## 8: VISIT

236 The nitrogen cycle scheme of VISIT is composed of three organic soil nitrogen pools (microbe, litter, and  
237 humus), two inorganic soil nitrogen pools (ammonium and nitrate), and vegetation pools. Fertilizer is  
238 considered as an input to the ammonium and nitrate pools at a fixed ratio, and manure as an input into the  
239 litter organic nitrogen pool. N<sub>2</sub>O emissions through nitrification and denitrification are estimated using the  
240 scheme developed by *Parton et al.* (1996). Nitrification-associated N<sub>2</sub>O emission ( $R_{nit,N_2O}$ ) is evaluated as  
241 follows,

$$242 R_{nit,N_2O} = f(WFPS)f(pH1)f(T1)(K_{max} + F_{max}f(NH_4)) \quad (16)$$

243 where  $K_{max}$  is the soil-specific turnover coefficient;  $F_{max}$  is the parameter of maximum nitrification gas flux;  
244 and  $f(NH_4)$  is the effect of soil ammonium on nitrification. Denitrification-associated N<sub>2</sub>O emission  
245 ( $R_{den,N_2O}$ ) is evaluated by the following equation:

$$246 R_{den,N_2O} = R_{den}(1 + R_{N_2/N_2O}) \quad (17)$$

$$247 R_{den} = \min(f(NO_3), f(CO_2)) \times f(WFPS) \quad (18)$$

248 where  $R_{N_2/N_2O}$  is the fractionation coefficient, which is also a function of WFPS, soil nitrate, and  
249 heterotrophic respiration,  $f(NO_3)$  is the maximum denitrification rate in high soil respiration rate  
250 condition,  $f(CO_2)$  is the maximum denitrification rate in high NO<sub>3</sub><sup>-</sup> levels, and  $f(WFPS)$  is the effect of  
251 WFPS on denitrification rate.

252 N<sub>2</sub>O production by nitrification ( $R_{N_2O,nit}$ , g N-N<sub>2</sub>O/m<sup>2</sup>/d) is expressed as a function of the potential daily rate  
253 of nitrification ( $R_{nit}$ , g N-NO<sub>3</sub><sup>-</sup>/m<sup>2</sup>/d), temperature and the water content as shown in *Zhang et al.* (2002).

$$254 R_{N_2O,nit} = f(WFPS)f(T1)R_{nit}p_{N_2O,nit} \quad (19)$$

255 where  $p_{N_2O,nit}$  (g N-N<sub>2</sub>O (g N-NO<sub>3</sub><sup>-</sup>)<sup>-1</sup>) is the reference N<sub>2</sub>O production per mass unit of NO<sub>3</sub><sup>-</sup> produced by  
256 nitrification. The denitrification occurs on the anaerobic fraction of the soil which is computed as a function  
257 of the water-filled porosity ( $f(WFPS)$ ) and is controlled by temperature, pH, soil NO concentration and  
258 denitrifier microbial activity ( $a_{microb}$ , g m<sup>-2</sup>) (*Li et al.*, 2000).

$$259 R_{N_2O,den} = f(WFPS)f(T2)f(pH)f(NO)p_{N_2O,den}a_{microb} \quad (20)$$

260 where  $f(NO)$  is a Michaelis-Menten shape function and  $p_{N_2O,den}$  is the reference N<sub>2</sub>O production per mass  
261 unit of denitrifier microbes.

### 262 SI-2 The FAOSTAT inventory

263 The FAOSTAT emissions data (*FAO*, 2022) are computed at Tier 1 following *IPCC* (2006), Vol.

264 4. The overall equation is as follows:

265 Direct emissions are estimated at the country level, using the formula:

$$266 Emission = A * EF \quad (21)$$

267 where emission represents kg N yr<sup>-1</sup>;  $A$  represents the amount of N in the following items (annual synthetic  
268 N applications/manure applied to soils/manure left on pasture/manure treated in manure management



283 systems/crop residue/biomass burned amount) in kg N yr<sup>-1</sup>; *EF* = Tier 1, default IPCC emission factors,  
284 expressed in kg N/kg N.

285

286 Indirect emissions are estimated at the country level, using the formula:

287

$$288 \quad \text{Emission} = A_{v\&l} * EF \quad (22)$$

289

290 where emission represents kg N yr<sup>-1</sup>; *A<sub>v&l</sub>* represents the fraction of manure/synthetic N fertilizers that  
291 volatilize as NH<sub>3</sub> and NO<sub>x</sub> and are lost through runoff and leaching in kg N yr<sup>-1</sup>; *EF* = Tier 1, default IPCC  
292 emission factors, expressed in kg N/kg N.

293

294 Synthetic N fertilizers: N<sub>2</sub>O from synthetic fertilizers is produced by microbial processes of nitrification  
295 and denitrification taking place on the addition site (direct emissions), and after volatilization/redeposition  
296 and leaching processes (indirect emissions).

297

298 Manure management: The term manure includes both urine and dung (i.e., both liquid and solid material)  
299 produced by livestock. N<sub>2</sub>O is produced directly by nitrification and denitrification processes in the manure,  
300 and indirectly by nitrogen (N) volatilization and redeposition processes.

301 Manure applied to soils: N<sub>2</sub>O is produced by microbial processes of nitrification and denitrification taking  
302 place on the application site (direct emissions), and after volatilization/redeposition and leaching processes  
303 (indirect emissions).

304

305 Manure left on pastures: N<sub>2</sub>O is produced by microbial processes of nitrification and denitrification taking  
306 place on the deposition site (direct emissions), and after volatilization/redeposition and leaching processes  
307 (indirect emissions).

308

309 Crop Residue: N<sub>2</sub>O emissions from crop residues consist of direct and indirect emissions from nitrogen (N)  
310 in crop residues left on agricultural fields by farmers and from forages during pasture renewal (following  
311 the definitions in the IPCC guidelines (*IPCC*, 2006)). Specifically, N<sub>2</sub>O is produced by microbial processes  
312 of nitrification and denitrification taking place on the deposition site (direct emissions), and leaching  
313 processes (indirect emissions).

314

315 Cultivation of organic soils: The FAOSTAT domain “Cultivation of organic soils” contains estimates of  
316 direct N<sub>2</sub>O emissions associated with the drainage of organic soils – histosols – under cropland and grazed  
317 grassland.

318

319 Burning-savanna: N<sub>2</sub>O emissions from the burning of vegetation biomass in the land cover types: Savanna,  
320 Woody Savanna, Open Shrublands, Closed Shrublands, and Grasslands. Burning-crop residues: N<sub>2</sub>O  
321 produced by the combustion of a percentage of crop residues burnt on-site. Burning-biomass: N<sub>2</sub>O  
322 emissions from the burning of vegetation biomass in the land cover types: Humid tropical forests, other  
323 forests, and organic soils.

324

### 325 **SI-3 The EDGAR v7.0 inventory**

326 The new online version, EDGAR v7.0 ([https://edgar.jrc.ec.europa.eu/dataset\\_ghg70](https://edgar.jrc.ec.europa.eu/dataset_ghg70)) incorporates a full  
327 differentiation of emission processes with technology-specific emission factors and additional end-of-pipe  
328 abatement measures and as such updates and refines the emission estimates. The emissions are modelled  
329 based on the latest scientific knowledge and available global statistics primarily from International Energy  
330 Agency (*IEA*, 2021) for energy related sectors, *FAO* statistics (*FAO*, 2022) for agriculture, which were  
331 complemented for the rest of sectors with United States Geological Survey (USGS), International Fertiliser  
332 Association (IFA), Gas Flaring Reduction Partnership (GGFR)/U.S. National Oceanic and Atmospheric

333 Administration (NOAA) and World Steel Association (worldsteel) recent statistics; the methods are those  
334 recommended by *IPCC* (2006). Official data submitted by the Annex I countries to the United Nations  
335 Framework Convention on Climate Change (UNFCCC) and to the Kyoto Protocol are used to some extent,  
336 particularly regarding control measures implemented since 1990 that are not described by international  
337 statistics. A fast-Track approach was used to extend the N<sub>2</sub>O emission time series for the latest years up to  
338 2021 (*Crippa et al.*, 2021; *Crippa et al.*, 2022).

339  
340 The N<sub>2</sub>O emission factors for direct soil emissions of N<sub>2</sub>O from the use of synthetic fertilizers, from manure  
341 used as fertilizers, and from crop residues are taken from *IPCC* (2006), which updated the default IPCC  
342 emission factor in the IPCC Good Practice Guidance (2000) with a 20% lower value. N<sub>2</sub>O emissions from  
343 the use of animal waste as fertilizer are estimated considering both the loss of N that occurs from manure  
344 management systems before manure is applied to soils and the additional N introduced by bedding material  
345 (*Janssens-Maenhout et al.*, 2019). N<sub>2</sub>O emissions from fertilizer use and CO<sub>2</sub> from urea fertilization are  
346 estimated based on IFA and FAO recent statistics.

347  
348 N<sub>2</sub>O emissions from manure management are based on the distribution of manure management systems  
349 from Annex I countries reporting to the UNFCCC, *Zhou et al.* (2007) for China and *IPCC* (2006) for the  
350 rest of the countries.

351  
352 Different N<sub>2</sub>O emission factors are applied to tropical and non-tropical regions. N and dry matter content  
353 of agricultural residues are estimated from the cultivation area and yield for 24 crop types from *FAO* (2022)  
354 and using emission factors of *IPCC* (2006).

355  
356 Indirect N<sub>2</sub>O emissions from leaching and runoff of nitrate are estimated from N input to agricultural soils.  
357 Leaching and runoff are assumed to occur in all agricultural areas except non-irrigated dryland regions,  
358 which are identified with maps of FAO Geonetwork (<https://www.fao.org/land-water/databases-and-software/geonetwork/en/>). The fraction of N lost through leaching and runoff is based on the study of *Van Drecht et al.* (2003). The updated emission factor for indirect N<sub>2</sub>O emissions from N leaching and run-off from the *IPCC* (2006) guidelines is selected, while noting that it is 70% lower than the mean value of the 1996 IPCC Guidelines and the IPCC Good Practice Guidance *IPCC* (1996; 2000).

363  
364 Indirect N<sub>2</sub>O emissions from atmospheric deposition of N of NO<sub>x</sub> and NH<sub>3</sub> emissions from non-agricultural  
365 sources, mainly fossil fuel combustion, are estimated using N in NO<sub>x</sub> and NH<sub>3</sub> emissions from these sources  
366 as activity data, based on EDGAR v7.0 database for these gases. The same emission factor from *IPCC*  
367 (2006) is used for indirect N<sub>2</sub>O from atmospheric deposition of N from NH<sub>3</sub> and NO<sub>x</sub> emissions, as for  
368 agricultural emissions (*Janssens-Maenhout et al.*, 2019).

369  
370 The uncertainties for EDGAR N<sub>2</sub>O emissions estimated by *Solazzo et al.* (2021) are based primarily on the  
371 uncertainties in emissions factors and activity data statistics from the *IPCC* (2006). Globally, these  
372 emissions are accurate within an interval of ±113 for energy, -12% to +16% for industrial processes and  
373 product use, -225 to +302 for agriculture, -159% to 203% for waste and ±112% for others; the most  
374 uncertain emissions are those related to N<sub>2</sub>O from waste and agriculture.

#### 375 376 **SI-4 The UNFCCC inventory (need description of UNFCCC)**

377 The UNFCCC collects detailed data on GHG emissions from its parties. Following extensive guidance  
378 developed by IPCC (*Buendia et al.*, 2019; *Eggleston et al.*, 2006), parties to the convention prepare national  
379 GHG inventories, including emissions (and sinks) of N<sub>2</sub>O. All anthropogenic activities are covered, in  
380 agriculture both direct and indirect N<sub>2</sub>O emissions are included. While IPCC basically provides emission  
381 factor approaches, parties are encouraged to take account of national specificities, use national factors and  
382 data, wherever available, or develop emission models, with adequate scientific proof provided.

383 Combustion-related emissions and emissions from industrial processes may take advantage of emission  
 384 monitoring or specific plant operation conditions, if provided. Emission processes that are not associated  
 385 with anthropogenic activities are also not covered in the inventories.

386  
 387 Obligations and quality of data provided differ strongly by country category. High scrutiny is put on GHG  
 388 inventories from countries listed in Annex-I of the convention (Annex-I countries include most European  
 389 countries, U.S. and Canada, Australia and New Zealand, and Japan). Annex-I countries are obliged to  
 390 provide annual national inventories in considerable detail and have to be very transparent also in terms of  
 391 methodology used and underlying information. Each year, time-series of emissions and underlying data  
 392 since 1990 (in a few cases, alternative base years are used) up to the pre-previous year are freshly provided  
 393 in April each year (e.g., in April 2023 data up to the year 2021 had to be provided), leading to a  
 394 homogeneous data series. Reports and emission data are provided (to UNFCCC, and to all users from the  
 395 UNFCCC web site at <https://unfccc.int/reports>) in standardized format such that they can be transferred to  
 396 databases. National results are routinely being checked and evaluated by expert teams in form of specific  
 397 internal and external audits to assure data quality and consistency.

398  
 399 National information is highly relevant also for non-Annex I countries to the UNFCCC and is being  
 400 collected and distributed by UNFCCC as well. Requirements are much less stringent, however, as parties  
 401 are expected to provide data only according to their own capabilities and the support they get from other  
 402 countries. The so-called Biannual Update Reports are to be prepared every other year only. While in  
 403 principle following the same IPCC guidance, commitments to format, timing, and quality assessment are  
 404 by far less stringent, and the own ambition level of the respective party (country) may determine much of  
 405 the outcome. In any case, self-reporting of a country always also means the party is willing to take the  
 406 responsibility of the emissions reported.

407  
 408 The “EDGAR/UNFCCC” dataset used in this paper utilizes the database for Annex-1 countries for  
 409 emissions from fossil-fuel consumption, industrial processes, waste and wastewater, and merges with the  
 410 respective set derived from EDGARv7.0 for all remaining countries.

#### 411 **SI-5 The SRNM model: Flux upscaling model**

412  
 413 The SRNM model (Wang et al., 2020) was applied to simulate direct cropland-N<sub>2</sub>O emissions. In SRNM,  
 414 N<sub>2</sub>O emissions were simulated from N application rates using a quadratic relationship, with spatially  
 415 variable model parameters that depend on climate, soil properties, and management practices. The original  
 416 version of SRNM was calibrated using field observations only from China (Zhou et al., 2015). In this study,  
 417 we used the global N<sub>2</sub>O observation dataset to train it to create maps of gridded annual emission factors of  
 418 N<sub>2</sub>O and the associated emissions at 5-minute resolution from 1901 to 2014 (Cui et al., 2021). The gridded  
 419 EF and associated direct cropland-N<sub>2</sub>O emissions are simulated based on the following equation:

$$422 \quad E_{ijt} = \alpha_{ij} N_{ijt}^2 + \beta_{ij} N_{ijt} + \varepsilon_{ijt}, \quad \forall i \quad (23)$$

423 where

$$424 \quad \alpha_{ij} \sim N\left(\sum_k (x_k \lambda_{ijk}), \sigma_{ijk}^2\right), \quad \beta_{ij} \sim N\left(\sum_k (x_k \phi_{ijk}), \sigma_{ijk}^{\prime 2}\right) \quad (24)$$

$$425 \quad \lambda_{ijk} \sim N(\mu_{ijk}, \omega_{ijk}^2), \quad \phi_{ijk} \sim N(\mu'_{ijk}, \omega_{ijk}^{\prime 2}), \quad \varepsilon_{ijt} \sim N(0, \tau^2) \quad (25)$$

426 and  $i$  denotes the sub-function of N<sub>2</sub>O emission ( $i=1, 2, \dots, I$ ) that applies for a sub-domain division  $W_i$  of  
 427 six climate or soil factors,  $j$  represents the type of crop ( $j=1-2$ , 1 for upland crops and 2 for paddy rice),  $k$  is  
 428 the index of climate or soil factors ( $k=1-6$ , i.e., soil pH, clay content, SOC, BD, the sum of cumulative

429 precipitation and irrigation, mean daily air temperature).  $W_i$  denotes a set of the range of multiple  $x_k$ .  $E_{ijt}$   
430 denotes direct N<sub>2</sub>O emission flux (kg N ha<sup>-1</sup> yr<sup>-1</sup>) estimated for crop type  $j$  in year  $t$  in the  $i$ th sub-domain,  
431  $N_{ijt}$  is N application rate (kg N ha<sup>-1</sup> yr<sup>-1</sup>), and  $a_{ij}$  and  $b_{ij}$  are defined as summation of the product of  $x_k$  and  $l_{ijk}$   
432 over  $k$ . The random terms  $l$  and  $f$  are assumed to be independent and normally distributed, representing the  
433 sensitivity of  $a$  and  $b$  to  $x_k$ .  $e$  is the model error.  $m$  and  $m\phi$  are the mean effect of  $x_k$  for  $a$  and  $b$ , respectively.  
434  $s$ ,  $s\phi$ ,  $w$ ,  $w\phi$ , and  $t$  are standard deviations. Optimal sub-domain division, associated parameters mean  
435 values and standard deviations were determined by using the Bayesian Recursive Regression Tree version  
436 2 (BRRT v2), constrained by the extended global cropland-N<sub>2</sub>O observation dataset. The detailed  
437 methodological approach of the BRRT v2 is described by Zhou et al (2015).  
438

### 439 **Global cropland N<sub>2</sub>O observation dataset**

440 We aggregated cropland N<sub>2</sub>O flux observation data from 180 globally distributed observation sites from  
441 online databases, on-going observation networks, and peer-reviewed publications (Figure SI-1). Chamber-  
442 based observations were only included in this dataset. These data repositories are as follows: the  
443 NitroEurope, CarbonEurope, GHG-Europe (EU-FP7), GRACEnet, TRAGnet, NANORP, and 14 meta-  
444 analysis datasets (Decock, 2014; Harris et al., 2014; Helgason et al., 2005; Hénault et al., 2005; Hickman  
445 et al., 2014; Kim et al., 2013a; Kim et al., 2013b; Lehuger et al., 2011; Leppelt et al., 2014; Rochette and  
446 Janzen, 2005; Sacks et al., 2010; Shcherbak et al., 2014; Stehfest and Bouwman, 2006; Walter et al., 2015).  
447 Four types of data were excluded from our analysis: (i) observations without a zero-N control for  
448 background N<sub>2</sub>O emission, (ii) observations from sites that used controlled-release fertilizers or nitrification  
449 inhibitors, (iii) observations not covering the entire crop growing season, (iv) observations made in  
450 laboratory or greenhouse. We then calculated cropland-N<sub>2</sub>O emissions as the difference between observed  
451 N<sub>2</sub>O emission ( $E$ ) and background N<sub>2</sub>O emission ( $E_0$ ). Values of EF were estimated for each nonzero N  
452 application rate ( $N_a$ ) as direct cropland-N<sub>2</sub>O emission divided by  $N_a$ :  $EF = (E - E_0)/N_a$ . This yielded a  
453 global dataset of direct cropland-N<sub>2</sub>O emissions, N-rate-dependent N<sub>2</sub>O EFs and fertilization records from  
454 each site (i.e., 1,052 estimates for upland crops from 152 sites and 154 estimates for paddy rice from 28  
455 sites), along with site-level information on climate, soils, crop type, and relevant experimental parameters.  
456 Total numbers of sites and total measurements in the dataset were more than doubled those for previous  
457 datasets of N<sub>2</sub>O EF. The extended global N<sub>2</sub>O observation network covered most of fertilized croplands,  
458 representing a wide range of environmental conditions globally. For each site in our dataset, the variables  
459 included four broad categories: N<sub>2</sub>O emissions data, climate data (cumulative precipitation and mean daily  
460 air temperature), soil attributes (soil pH, clay content, SOC, BD), and management-related or experimental  
461 parameters (N application rate, crop type). More details on global cropland N<sub>2</sub>O observation dataset can be  
462 found in Cui et al. (2021).  
463

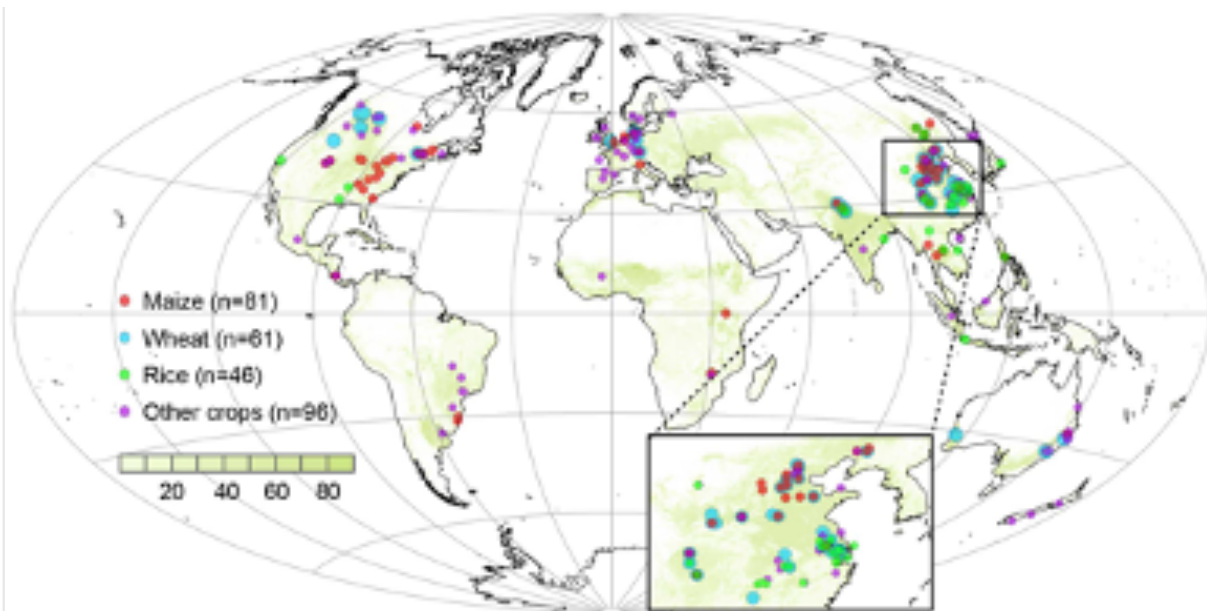

464  
 465 **Figure SI-1 Global observation dataset of N<sub>2</sub>O EF for direct soil emissions.** Green area indicates the  
 466 harvested areas of all crops derived from the Earthstat. Sites are indicated in different colors for maize,  
 467 wheat, rice, and other crops.  
 468

469 **Gridded input datasets:**

470 The updated SRNM model was driven by many input datasets, including climate, soil properties,  
 471 agricultural management practices (e.g., fertilization, tillage, irrigation), as well as the historical distribution  
 472 of cropland. Cumulative precipitation and mean daily air temperature over the growing season were  
 473 acquired from the CRU TS V4.06 climate dataset (0.5-degree resolution) (Harris *et al.*, 2014), where  
 474 growing season in each grid cell was identified following Sacks *et al.* (2010). The patterns of SOC, clay  
 475 content, BD, and soil pH were acquired from the HWSD v1.2 ((Berdanier and Conant, 2012), 1-km  
 476 resolution). Both climate and soil properties were re-gridded at 5-arc-minute spatial resolution using a first-  
 477 order conservative interpolation widely used in the CMIP5 model intercomparison (Yang *et al.*, 2017). The  
 478 annual cropland area at 5-arc-minute spatial resolution from 1961 to 2020 was obtained from the History  
 479 Database of the Global Environment (HYDE 3.2.1) (Goldewijk *et al.*, 2017).  
 480

481 For fertilization, crop-specific N fertilizer inputs (including synthetic N fertilizers, crop residues and  
 482 manure), fertilizer types, and placement during 1961-2020 were obtained from Adalibieke *et al.*, (2023).  
 483 The frequency (i.e., one or multiple times) of N fertilization were the same as Cui *et al.* (2021) and we  
 484 assumed that the frequency remained constant during the study period. For tillage, the fraction of tillage by  
 485 crop during 1961-2020 was obtained from Adalibieke *et al.*, (2023), which was constructed with the country  
 486 and province (or state) level no-tillage area data during 1961-2020 and downscaled to grid with the method  
 487 of Porwollik *et al.* (2019). For irrigation, the History Database of the Global Environment (HYDE version  
 488 3.2) (Goldewijk *et al.*, 2017) and the MIRCA2000 dataset (Portmann *et al.*, 2010) were used to compile the  
 489 global crop-specific irrigation proportion data from year 1961 to 2020. Categories of cropland in HYDE  
 490 provided new distinctions with irrigated and rain-fed crops (upland crops, other than rice), irrigated and  
 491 rain-fed rice during 1960-2017. The national-level dataset of “Agricultural area actually irrigated” was  
 492 obtained from (FAO, 2022), which was used to scale the baseline year 2015 maps of irrigated area from  
 493 HYDE over the period 2016-2020. The area of irrigated upland crops from HYDE was first disaggregated  
 494 into 21 crops based on the irrigated proportion from MIRCA2000 for per grid cell. We assumed an even  
 495 share of irrigated area by each upland crop during the period 1961-2020, like MIRCA2000. Finally, the  
 496 crop-specific irrigated area was masked by reporting harvested area, then the irrigated proportion of each

497 crop can be calculated as the crop-specific irrigated area divided by the physical area of each crop. For rice,  
498 we further divided irrigated rice into continuously and intermittently flooded systems as provided by *Cui*  
499 *et al.* (2021), and we assumed that the irrigation proportion was kept the same during the study period.

500

## 501 **SI-6 Global N flow in aquaculture**

502 We applied the IMAGE-GNM aquaculture nutrient budget model for shellfish and finfish (*Bouwman et al.*,  
503 2013; *Bouwman et al.*, 2011) to calculate the nutrient flows in aquaculture production systems. These flows  
504 comprise feed inputs, retention in the fish, and nutrient excretion. Individual species within crustaceans,  
505 seaweed, fish and molluscs are aggregated to the International Standard Statistical Classification of Aquatic  
506 Animals and Plants (ISSCAAP) groups (*FAO*, 2022), for which production characteristics are specified.  
507 Feed and nutrient conversion rates are used for each ISSCAAP group to calculate the feed and nutrient  
508 intake based on production data from *FAO* (*FAO*, 2020). Feed types include home-made aquafeeds and  
509 commercial compound feeds with different feed conversion ratios that also vary in time due to efficiency  
510 improvement; in addition, the model accounts for algae in ponds, that are often fertilized with commercial  
511 fertilizers or animal manure, consumed by omnivore fish species like carp. A special case is the filter-  
512 feeding bivalves that filter seston from the water column, and excrete pseudofeces, feces and dissolved  
513 nutrients. Based on production data and tissue/shell nutrient contents, the model computes the nutrient  
514 retention in the fish. Using apparent digestibility coefficients, the model calculates outflows in the form of  
515 feces (i.e., particulate nutrients) and dissolved nutrients. Finally, nutrient deposition in pond systems and  
516 recycling are calculated. For computing the N<sub>2</sub>O emissions, we consider the amount of N released to the  
517 environment, i.e., the difference between N intake and N in the harvested fish, which includes all the  
518 nutrient excretion. Since in pond cultures part of that N is managed, we made the amount of N recycling  
519 explicit, as well as ammonia emissions from ponds. This is to avoid double counting when computing N<sub>2</sub>O  
520 emissions from crop production.

521

## 522 **SI-7 Continental Shelves N<sub>2</sub>O fluxes**

523 N<sub>2</sub>O emissions from the global ocean do not include the contribution from continental shelves and are added  
524 here using the extended mask of *Laruelle et al.* (2017) to delineate the coastal ocean. This mask excludes  
525 estuaries and inland water bodies, while its outer limit is set 300 km away from the shoreline. Within this  
526 coastal ocean domain, gridded N<sub>2</sub>O emissions were calculated using one data-driven estimate and three  
527 high-resolution model estimates from two distinct models, all interpolated on the same 0.25° x 0.25° grid.  
528 Models and data are each covering different time-periods and only one climatology is provided, keeping  
529 the original timespan of each product: 1988-2017 for the observation-based product that relied on a random-  
530 forest (RF) algorithm to interpolate N<sub>2</sub>O data (*Yang et al.*, 2020) from the MEMENTO database (MEM-  
531 RF) (*Kock and Bange*, 2015), 1998-2018 for the estimate relying on the high-resolution configuration  
532 (*Berthet et al.*, 2019) of the global ocean-biogeochemical component of CNRM-ESM2-1 (CNRM-0.25°),  
533 1998-2013 and 2006-2013 for the estimates relying on the ECCO-Darwin model running at 1/3° (ECCO-  
534 Darwin1) and 1/6° (ECCO-Darwin2), respectively. The resulting climatology can be considered as broadly  
535 representative of the last 2-3 decades. Each product is further described as follows:

536

### 537 **MEM-RF**

538 The N<sub>2</sub>O air-sea flux reconstruction by *Yang et al.* (2020) is based on a synthesis of over 158,000  
539 observations of N<sub>2</sub>O mixing ratio, partial pressure, and concentration in the surface ocean from the  
540 MEMENTO database (<https://memento.geomar.de>) (*Kock and Bange*, 2015) and additional cruises  
541 (Dataset S1) (*Yang et al.*, 2020). N<sub>2</sub>O measurements are converted to surface N<sub>2</sub>O mixing ratio anomalies  
542 using observations from the NOAA atmospheric flask dataset (*Hall et al.*, 2007), and extrapolated to a 0.25-  
543 degree resolution global monthly climatology using an ensemble of 100 random forest realizations. The  
544 random forest algorithm predicts N<sub>2</sub>O mixing ratio anomalies based on their relationship to oceanographic  
545 predictors that include hydrographic variables, nutrients, oxygen, chlorophyll, net primary production, and

546 seafloor depth. Reconstructed mixing ratio climatologies are used to estimate air-sea fluxes by applying a  
547 commonly used gas exchange parameterization (Wanninkhof, 2014). Two formulations of piston velocity  
548 are adopted: one based on a quadratic dependence on wind speed (Wanninkhof, 2014), and one that  
549 explicitly accounts for bubble-mediated fluxes (Liang *et al.*, 2013). Sea ice cover, surface temperature,  
550 salinity and atmospheric pressure are taken from ERA5 reanalysis (Hersbach *et al.*, 2017). Calculations are  
551 performed with two high-resolution wind products (ERA5 and CCMP) that are available at 0.25, 6-hourly  
552 resolution for the period from 1988 to 2017, yielding four permutations of the piston velocity. The resulting  
553 ensemble of 400 global N<sub>2</sub>O air-sea flux estimates is averaged in time to obtain monthly mean  
554 climatologies. A description of the dataset and methods is presented in Yang *et al.* (2020). The code used  
555 to produce these datasets is archived on a public GitHub repository at [https://github.com/yangsi7/mapping-](https://github.com/yangsi7/mapping-ocean-n2o)  
556 [ocean-n2o](https://github.com/yangsi7/mapping-ocean-n2o) (DOI: 10.5281/zenodo.3757194).  
557

### 558 **CNRM-0.25°**

559 N<sub>2</sub>O fluxes have been inferred from the global ocean-biogeochemical component of CNRM-ESM2-1  
560 (Séférian *et al.*, 2019) run at 0.25° horizontal resolution with 75 vertical levels in the ocean. This high-  
561 resolution configuration is described in Berthet *et al.* (2019) and is based on the NEMOV3.6 oceanic model  
562 (Madec, 2008), the multi-category sea ice model GELATOV6 (Salas y Méliá, 2002) and the PISCESv2-gas  
563 model for marine biogeochemistry (Aumont *et al.*, 2015), which includes an updated version of (Martinez-  
564 Rey *et al.*, 2015) for the marine N<sub>2</sub>O module. The simulation was first spun-up during 300 years under  
565 preindustrial conditions and then has been forced by the OMIP2-compliant JRA55-do-1-5 atmospheric  
566 reanalysis (Tsujino *et al.*, 2020; Tsujino *et al.*, 2018) considering the historical evolution of CO<sub>2</sub> and N<sub>2</sub>O  
567 in the atmosphere since the year 1850. Boundary conditions for nitrogen deposition and riverine inputs are  
568 prescribed from monthly climatologies. The suboxic production of N<sub>2</sub>O uses the oxygen-dependent  
569 formulation of Jin and Gruber (2003) and is enhanced at low oxygen concentrations. This formulation  
570 encompasses N<sub>2</sub>O production during remineralization, nitrification and grazing, as well as a sink term  
571 corresponding to N<sub>2</sub>O consumption under anoxic conditions by denitrification. The oceanic N<sub>2</sub>O partial  
572 pressure is computed based on the surface N<sub>2</sub>O concentration and the N<sub>2</sub>O solubility in the ocean. Sea-to-  
573 air N<sub>2</sub>O fluxes are then computed using the standard gas exchange parameterization of Wanninkhof (1992;  
574 2014).  
575

### 576 **ECCO-Darwin & ECCO2-Darwin**

577 To generate global air-sea fluxes of nitrous oxide (N<sub>2</sub>O) from the global ocean we have used the ECCO-  
578 Darwin Model (Carroll *et al.*, 2020). The ECCO-Darwin model is based on MITgcm and it has a nominal  
579 horizontal resolution of 1/3 of a degree with 50 vertical levels where in the top 100 meters the model is  
580 vertically resolved with 10-meter grid boxes. The ECCO-Darwin model is forced with an atmospheric  
581 forcing corresponding to the 1992-present optimized with adjoint technique in order to realistically  
582 represent the observed physical climate phenomena such as El Niño, the Pacific Decadal Oscillation, the  
583 North Pacific “Warm Blob”, etc. A more detailed description of the model forcing and the Darwin  
584 biogeochemical model configuration used in this study can be found in Carroll *et al.* (2020).  
585

586 The Darwin biogeochemical/ecological model (Carroll *et al.*, 2020; Manizza *et al.*, 2019) used for this  
587 study carries 33 biogeochemical tracers to explicitly represent the cycle of carbon, oxygen, phosphorus,  
588 silica, and iron in the global ocean. For this particular version of the model, we implemented a  
589 parameterization of the oceanic cycle of N<sub>2</sub>O using the scheme of Nevison *et al.* (2003) based on the oceanic  
590 oxygen cycle previously represented in ECCO2-Darwin model (Ganesan *et al.*, 2020). The air-sea gas flux  
591 of N<sub>2</sub>O was parameterized according to Wanninkhof (1992). In addition, a thermal- only N<sub>2</sub>O tracer (a tracer  
592 in which biogeochemical sources and sinks are suppressed but with the same solubility as N<sub>2</sub>O) was also  
593 added to the model to isolate the process of ocean ventilation affecting the N<sub>2</sub>O concentration in the ocean  
594 at seasonal time scales as done in Manizza *et al.* (2012). The ECCO-Darwin numerical simulation was run

595 for the 1992-2014 period, but we discarded the inclusion of the output relative to the 1992-1996 period in  
596 our analysis due to the model adjustment in this initial part of our numerical simulation.

597

### 598 **SI-8 Open Ocean N<sub>2</sub>O fluxes**

599 N<sub>2</sub>O is produced in the open ocean by microbial activity during organic matter cycling in the subsurface  
600 ocean, and its production pathways are influenced by the local environmental oxygen level. In the oxic  
601 ocean N<sub>2</sub>O is produced as a byproduct during the oxidation of ammonia to nitrate, mediated by ammonia  
602 oxidizing bacteria and archaea. N<sub>2</sub>O is also produced and consumed in sub-oxic and anoxic waters through  
603 the action of marine denitrifiers during the multi-step reduction of nitrate to gaseous N. The oceanic N<sub>2</sub>O  
604 distribution therefore displays significant heterogeneity with background levels of 10-20 nmol/l in the well-  
605 oxygenated ocean basins, high concentrations (> 40 nmol/l) in hypoxic waters, and N<sub>2</sub>O depletion in the  
606 core of ocean oxygen minimum zones (OMZs).

607

608 For this synthesis open ocean N<sub>2</sub>O emissions to the atmosphere were compiled from four global ocean  
609 biogeochemistry models/Earth System models that simulate the production, consumption and circulation  
610 of oceanic N<sub>2</sub>O (Table 6). N<sub>2</sub>O flux exchange between ocean and atmosphere is derived using gas-exchange  
611 parameterizations applied to modeled surface ocean N<sub>2</sub>O. Versions of the four submitting models also  
612 participated in the previous N<sub>2</sub>O budget synthesis (*Tian et al.*, 2020a). Model details and updates to the  
613 previous N<sub>2</sub>O budget synthesis are summarized below.

614 The models differ in aspects of physical configuration (e.g., spatial resolution), meteorological forcing  
615 applied at the ocean surface, and in their parameterizations of ocean biogeochemistry; specific details on  
616 individual models are provided in the publications listed in Table 1. Towards this N<sub>2</sub>O budget synthesis,  
617 modelling groups reported grid-resolved (1°×1° horizontal resolution) monthly estimates of ocean-  
618 atmosphere N<sub>2</sub>O fluxes for the period 1980-2020 (or for as many years as possible in that period).

619

### 620 **U. Bern: Bern-3D**

621 N<sub>2</sub>O fluxes are derived from the Bern-3D Earth System Model of Intermediate Complexity which includes  
622 a prognostic marine biogeochemistry model (based on (*Parekh et al.*, 2008) and (*Tschumi et al.*, 2011)).  
623 Configuration of the model for simulation of N<sub>2</sub>O is outlined in *Battaglia and Joos* (2018). Model  
624 simulations were run at a native resolution of horizontal resolution of 41 by 40 grid cells and 32  
625 logarithmically scaled vertical layers. Modifications of the biogeochemistry model relevant for the N<sub>2</sub>O  
626 cycle include the assignment of organic matter remineralization to aerobic and anaerobic pathways  
627 dependent on mean grid-cell dissolved oxygen level. N<sub>2</sub>O is produced by nitrification as a product of  
628 remineralization rate and a specified N<sub>2</sub>O yield which has a functional form dependent on oxygen level (see  
629 details in (*Battaglia and Joos*, 2018)). N<sub>2</sub>O consumption by denitrification processes is represented by a  
630 first-order kinetics formulation which also includes a dependence on local oxygen level to account for the  
631 relative importance of denitrification-related N<sub>2</sub>O production and consumption processes in each gridcell.  
632 Measurements of dissolved N<sub>2</sub>O (surface and interior) from the MEMENTO database (*Kock and Bange*,  
633 2015) together with an ensemble of model runs are used to constrain the model parameters governing N<sub>2</sub>O  
634 production and consumption mechanisms. From a pre-industrial equilibrium state the model is forced by  
635 historical CO<sub>2</sub> emissions, non-CO<sub>2</sub> radiative forcing, and land-use changes. N<sub>2</sub>O in the atmosphere is  
636 prescribed based on historical data.

637

### 638 **CNRM: CNRM-ESM2-1**

639 N<sub>2</sub>O fluxes are provided by the CNRM-ESM2-1 Earth System model. The ocean model component is based  
640 on NEMO Version 3.6 (*Madec et al.*, 2017) and coupled to the GELATO sea ice model (*Salas y Méliá*,  
641 2002) Version 6 and the marine biogeochemical model PISCESv2-gas (*Aumont et al.*, 2015). The spatial  
642 model resolution follows the eORCA1L75 grid, with a nominal horizontal resolution of 1° and with higher  
643 resolution in the tropics (increasing to ~-(1/3)°). The model has 75 vertical levels with higher resolution



644 towards the ocean surface. The simulations were forced at the surface by the atmospheric state of JRA55-  
645 do v1.5.0 (Tsujino *et al.*, 2018). Atmospheric N<sub>2</sub>O concentration is given as annual means as specified by  
646 CMIP6 protocols and is linearly interpolated in time. Parameterization of the marine N<sub>2</sub>O cycle follows that  
647 of *Martinez-Rey et al.* (2015) with some modifications. N<sub>2</sub>O production is driven by an oxygen-dependent  
648 yield of N<sub>2</sub>O, which encompasses production from denitrification and nitrification processes. This  
649 formulation also assumes a constant background yield representing N<sub>2</sub>O production by nitrification and a  
650 consumption of N<sub>2</sub>O in suboxic conditions. Originally implemented by *Martinez-Rey et al.* (2015), the  
651 marine N<sub>2</sub>O parameterization has benefited from a recoding and an improved calibration presented in  
652 *Berthet et al.* (2023). Further details of the model biogeochemistry and configuration are provided by  
653 *Séférian et al.* (2019) and *Berthet et al.* (2019).

#### 654 **UVic2.9**

656 N<sub>2</sub>O model fluxes are derived from the UVic2.9, Earth System Model of Intermediate Complexity with  
657 prescribed monthly climatological winds (*Kalnay et al.*, 1996) and ice sheets (*Peltier*, 2004), configuration  
658 outlined in *Landolfi et al.* (2017). Oceanic subsurface N<sub>2</sub>O production is parameterized following (*Zamora*  
659 *and Oschlies*, 2014), as a function of O<sub>2</sub> consumption with a linear O<sub>2</sub> dependency, inherently including  
660 both nitrification and denitrification. In O<sub>2</sub>-deficient waters (<4 mmol m<sup>-3</sup>), denitrification becomes a sink  
661 of N<sub>2</sub>O consumed at a constant rate. The gradient driving the air-sea N<sub>2</sub>O gas exchange, is computed online  
662 based on departure of the surface ocean concentration from the saturation value using the solubility  
663 coefficients of *Weiss and Price* (1980) and time-varying prescribed atmospheric N<sub>2</sub>O concentrations  
664 (historical and RCP8.5). The model was spun-up for 6000 years with preindustrial boundary conditions  
665 (solar and volcanic and aerosol forcing, fixed atmospheric CO<sub>2</sub> of 280 ppm and N<sub>2</sub>O of 276 ppb, and  
666 preindustrial atmospheric N deposition).

#### 668 **UEA: NEMO-PlankTOM10.2**

669 N<sub>2</sub>O model fluxes are derived from the NEMO-PlankTOM10.2 ocean model. The physical circulation  
670 component is NEMO v3.1 (*Madec*, 2008), with horizontal resolution of 2° longitude, and a variable  
671 latitudinal resolution (average ~1°) with higher resolution in the tropics and polar regions. The model has  
672 30 vertical layers, with variable resolution ranging from 10m in the upper 100m to 500m at depths of 5000  
673 m. The biogeochemical component relies on the marine ecosystem model PlankTOM10, which includes  
674 representation of 10 plankton functional types (*Le Quéré et al.*, 2016). It has been extended by *Buitenhuis*  
675 *et al.* (2018) to include nitrogen cycle processes, and prognostic and diagnostic models of N<sub>2</sub>O production.  
676 N<sub>2</sub>O is produced from nitrification and denitrification pathways, with oxygen dependent yields employed  
677 to account for varying production and consumption processes in hypoxic waters. Nitrogen cycle parameters  
678 are optimized using ocean databases of dissolved N<sub>2</sub>O (MEMENTO, *Kock and Bange* (2015)) nitrification  
679 rates (*Yool et al.*, 2007), and surface ammonium concentrations (*Johnson et al.*, 2015; *Paulot et al.*, 2015).  
680 Further details on model configuration are provided in (*Buitenhuis et al.*, 2018).

#### 682 **SI-9 Net N<sub>2</sub>O emission from land cover change**

683 This section mainly involves the calculation of post-deforestation N<sub>2</sub>O emissions, deforestation induced  
684 N<sub>2</sub>O reduction and N<sub>2</sub>O emissions from forest regrowth (afforestation or reforestation). The methods  
685 include both bookkeeping and process-based modeling.

##### 687 **a. Deforestation area, crop/pasture expansion and secondary forests**

688 The LUH2 v2h (land use harmonization, <http://luh.umd.edu>) land use data was used to derive the  
689 deforestation area and its partition between crops and pastures during 1860–2020. LUH2 categorizes forest  
690 lands into forested primary land and potentially forested secondary land, while croplands are divided into  
691 C3 annual crops, C3 perennial crops, C4 annual crops, C4 perennial crops, and C3 N-fixing crops.

692

693 In the empirical computation of deforestation induced N<sub>2</sub>O emissions, all sub-classes within each land use  
694 type were treated the same. Thus, only the annual transition area from forests to croplands or managed  
695 pasture was needed. In the process-based estimates, the DLEM model was improved to further account for  
696 the classifications of primary forests, secondary forests (further partitioned into established and newly  
697 converted by an age threshold of 15 years), croplands/pastures /rangelands (further partitioned into  
698 established and newly converted by an age threshold of seven nine years). Each land use type can be divided  
699 into several different plant functional types (PFTs). Specifically, within a grid cell, cropland can only be  
700 dominated by only one crop type. The pastures and rangelands can be either C3 type or C4 type. To generate  
701 the historical spatial distribution of PFTs, a potential vegetation map and the accompanied composition  
702 ratio map of each natural PFT acquired from the Synergetic Land Cover Product (SYNMAP) were jointly  
703 used with LUH2 v2h.

## 704 **b. Methods**

706 The bookkeeping method was mainly applied to the tropical areas, where forests generally have high N<sub>2</sub>O  
707 emissions. Specifically, the average tropical forest N<sub>2</sub>O emission rate of 1.974 kg N<sub>2</sub>O-N ha<sup>-1</sup> yr<sup>-1</sup> was  
708 adopted as the baseline. Two logarithmic response curves of soil N<sub>2</sub>O emissions (normalized to the baseline)  
709 after deforestation were developed:  $y = -0.31 \ln(x) + 1.53$  and  $y = -0.454 \ln(x) + 2.21$ . This form of the  
710 response functions can effectively reproduce the short-lived increase in soil N<sub>2</sub>O emissions after initial  
711 forest clearing and the gradually declining emission rates of converted crops/pastures (Melillo *et al.*, 2001;  
712 Verchot *et al.*, 1999). Using these two curves and the baseline, we kept track of the N<sub>2</sub>O reduction of tropical  
713 forests and the post-deforestation crop/pasture N<sub>2</sub>O emissions at an annual timescale.

715 There are not many studies on N<sub>2</sub>O emissions from secondary tropical forests that regrowth after crop or  
716 pasture abandonment. Sullivan *et al.* (2019) lumped together all forms of N "gas loss" including NO and  
717 N<sub>2</sub>O for secondary forests across the tropics and the results showed gas loss gradually increases with age  
718 since the regrowth of secondary forest. Keller and Reiners (1994) also reported a gradual recovery of soil  
719 nitrate and soil emissions of N<sub>2</sub>O and nitric oxide (NO) during 20 years of secondary forest succession,  
720 which however did not return to the level of the primary forests. In this study, using field observations from  
721 Davidson *et al.* (2007) and Keller and Reiners (1994), we regressed normalized N<sub>2</sub>O emissions (relative to  
722 a reference mature forest) of secondary tropical forests with their ages as  $y=0.0084x + 0.2401$  ( $R^2 = 0.44$ ;  
723 unit of  $x$  is year). The derived  $y$  values were multiplied by tropical forest N<sub>2</sub>O emissions estimated by  
724 NMIP2 models that do not distinguish secondary forests from primary forests.

726 The DLEM model was run with varying climate and CO<sub>2</sub> with other factors held constant to estimate forest  
727 baseline emissions and unfertilized crop/pasture emissions from 1860-2020. The climate data were acquired  
728 from CRUJRA, which is a fusion of the CRU and JRA reanalysis products at a spatial resolution of 0.5° ×  
729 0.5° and a daily time-step. The atmospheric CO<sub>2</sub> data were obtained from NOAA GLOBLVIEW-CO2  
730 dataset (<https://www.esrl.noaa.gov>), which are derived from atmospheric and ice core measurements. In  
731 the tropical area, both estimates from the DLEM model and the bookkeeping method were adopted, whereas  
732 in extra-tropical area, we only adopted the DLEM outputs.

## 734 **SI-10 Inland water, estuaries, and coastal vegetation**

### 736 **a. Dynamic Land Ecosystem Model-Terrestrial/Aquatic Continuum (DLEM-TAC)**

737 To quantify N<sub>2</sub>O emissions from global inland waters (rivers, lakes, and reservoirs), we use a process-based  
738 coupled terrestrial-aquatic model, which builds up on the Dynamic Land Ecosystem Model (DLEM).  
739 DLEM-TAC is a fully distributed, process-based land surface model which couples the major land  
740 processes (terrestrial hydrology, plant phenology and physiology, soil biogeochemistry) and aquatic  
741 dynamics (lateral transport and in-stream biogeochemistry) (Pan *et al.*, 2021; Tian *et al.*, 2015; Tian *et al.*,  
742 2020b; Yao *et al.*, 2020). The land component of DLEM-TAC explicitly simulates the carbon, nitrogen,

743 and water fluxes between plants, soil, and atmosphere, and the surface and drainage runoff and nitrogen  
744 load from the land module are used as input for the aquatic module. The simulated nitrogen load  
745 includes dissolved inorganic nitrogen (DIN), dissolved organic nitrogen (DON), particulate organic  
746 nitrogen (PON), and runoffs, sewers as the initial condition of the aquatic module.

747  
748 DLEM-TAC aquatic module calculated lateral water transport and the associated aquatic biogeochemical  
749 processes by adopting a scale-adaptive scheme. The water transport scheme, which coupled hillslope flow,  
750 subnetwork flow, and main channel flow, simulated the water transport processes within grid cells. In the  
751 aquatic module, lakes and reservoirs were linked with small streams and large rivers, forming a river-lake-  
752 reservoir corridor (*Wollheim et al.*, 2008)). Particularly, lakes that are linked to small streams are typically  
753 small in size and are defined as small lakes, while those linked to large rivers are usually had large size and  
754 are defined as large lakes; similarly, reservoirs that are linked to main channels are considered as large  
755 reservoirs, while those that are linked to small streams are considered as small reservoirs. The incoming  
756 flow of a linked river-lake-reservoir corridor drains to lakes first, and the outflow rate of lakes and reservoirs  
757 is determined based on the predefined residence time obtained from the global lake dataset (*Lehner et al.*,  
758 2011; *Messenger et al.*, 2016; *Yao et al.*, 2022). The aquatic N module was developed based on the scale  
759 adaptive water transport scheme, including lateral transport, decomposition of organic matter, particle  
760 organic matter deposition, nitrification, and denitrification. The detailed description could be found in the  
761 previous studies (*Pan et al.*, 2021; *Tian et al.*, 2020b; *Yao et al.*, 2020).

762  
763 Following our previous work referring to the development of water transport and biogeochemistry, we  
764 developed an inland water N<sub>2</sub>O module within the aquatic biogeochemical component of the DLEM  
765 framework (*Yao et al.*, 2020). The net fluxes of dissolved N<sub>2</sub>O (including physical and biogeochemical  
766 processes) in the main channel (high-order streams) and subnetwork (small rivers) are estimated as:

$$(ΔM_{N_2O}) / Δt = Fa + Y_{water} + D - R - E \quad (26)$$

768 where M<sub>N<sub>2</sub>O</sub> is the total mass of dissolved N<sub>2</sub>O in the main channel or subnetworks (g N), Δt is the time  
769 step, Fa is advective N<sub>2</sub>O fluxes (g N d<sup>-1</sup>), Y<sub>water</sub> is the N<sub>2</sub>O production within the water column (g N d<sup>-1</sup>),  
770 D is the dissolved N<sub>2</sub>O from rainfall to rivers (i.e. deposition) (g N d<sup>-1</sup>) with an initial concentration equal  
771 to the atmospheric equilibrium N<sub>2</sub>O concentration, R is the flux from N<sub>2</sub>O reduction (g N d<sup>-1</sup>) to nitrogen  
772 gas, and E is the riverine N<sub>2</sub>O efflux (g N d<sup>-1</sup>) through the air-water interface.

773  
774 Input data. The driving data of DLEM-TAC include the climate variables, atmospheric CO<sub>2</sub> concentration,  
775 land use change, nitrogen (N) deposition, N fertilizer, and manure application with a spatial resolution of  
776 0.5°× 0.5°. The daily climate variables (precipitation, mean temperature, maximum temperature, minimum  
777 temperature, and shortwave radiation) were obtained from the CRUNCEP dataset  
778 (<https://vesg.ipsl.upmc.fr>) for 1901-2019. Climate data of each year during 1850-1900 was randomly  
779 sampled from 1901-1920. Annual atmospheric CO<sub>2</sub> concentration from 1900-2019 was obtained from the  
780 NOAA GLOBALVIEW-CO<sub>2</sub> dataset (<https://www.esrl.noaa.gov>). The annual land use change data was  
781 derived from a potential natural vegetation map (synergetic land cover product) and a prescribed cropland  
782 area dataset from the history database of the global environment v.3.2 (HYDE 3.2, <ftp://ftp.pbl.nl/hyde>).  
783 The data of N fertilizer, manure N application, and N deposition data was obtained from (*Tian et al.*, 2022).

784  
785 In the aquatic module, the required channel dataset included channel slope, channel width, and channel  
786 length generated from the Hydrosched dataset (*Lehner et al.*, 2008) and DDM30 dataset (*Döll and Lehner*,  
787 2002). The flow direction and distance data were obtained from the Dominant River Tracing (DRT) dataset.  
788 For modeling water dynamics in lakes and reservoirs, we generated 0.5 grid level surface water area,  
789 upstream area, volume, depth, and average residence time for lakes based on the Hydrolakes dataset

790 (*Messenger et al.*, 2016), while the GRand database provided the same information for reservoirs (*Lehner*  
791 *et al.*, 2011).

792  
793 Simulation protocol. DLEM-TAC simulations include three steps: equilibrium run, spin-up run and two  
794 transit runs, one with dam operation close, and another one with dam operation open. First, the equilibrium  
795 run is required to obtain the initial and steady condition of carbon, nitrogen, and water pool at the pre-  
796 industrial level in each grid cell (*Thornton and Rosenbloom*, 2005). In this step, we held all the driving  
797 forces such as climate data, atmospheric CO<sub>2</sub> concentration, land use data, and nitrogen additions consistent  
798 with the first year's data we used in the simulation. Second, we conducted a 30-year spin-up run by  
799 randomly selecting climate data within the 1850s (*Tian et al.*, 2012a). This step can alleviate the disturbance  
800 of driving data changes in the transit run. Then we conduct the natural flow simulation with the dam model  
801 temporarily closed, and all the driving forces change over time. After the natural flow simulation, we set  
802 up a management flow simulation with the dam module open, specifically the dam module needs natural  
803 flow in the previous run as model input.

#### 804 805 **b. Mechanistic Stochastic Modeling of N<sub>2</sub>O emissions from large rivers, lakes, reservoirs, and** 806 **estuaries:**

807  
808 To calculate the cascading loads of TN and TP delivered to each water body along the river–reservoir–  
809 estuary continuum, we spatially routed all reservoirs from the GRand database (*Lehner et al.*, 2011), with  
810 river networks from Hydrosheds 15s (*Lehner et al.*, 2008) and, at latitudes above 50°N, Hydro1K  
811 (<http://edc.usgs.gov/products/elevation/gtopo30/hydro/>), which were in turn connected to estuaries as  
812 represented in the “Worldwide Typology of Nearshore Coastal Systems” of *Dürr et al.* (2011). In addition,  
813 the global database HydroLAKES (*Messenger et al.*, 2016) was used to topologically connect 1.4 million  
814 lakes with a minimum surface area of 0.1 km<sup>2</sup> within the river network. Note that besides natural lakes,  
815 HydroLAKES includes updated information on 6,796 reservoirs from the GRand database, which was used  
816 in the study of *Maavara et al.* (2019). In order to estimate the TN and TP loads to each water body, we then  
817 relied on a spatially explicit representation of TN and TP mobilization from the watershed into the river  
818 network (see (*Maavara et al.*, 2019) for details (*Bouwman et al.*, 2009; *Van Drecht et al.*, 2009)).

819  
820 For the estimation of N<sub>2</sub>O emission, we applied two distinct model configurations, respectively named DS1  
821 and DS2 in *Maavara et al.* (2019). DS1 estimates N<sub>2</sub>O emissions from denitrification and nitrification based  
822 on an EF of 0.9%, which is in the mean of published values (*Beaulieu et al.*, 2011), and the assumption that  
823 N<sub>2</sub>O production equals N<sub>2</sub>O emissions (*Maavara et al.*, 2019). For DS2, the reduction of N<sub>2</sub>O to N<sub>2</sub> during  
824 denitrification if N<sub>2</sub>O is not evading sufficiently rapidly from the water body is considered. The fluxes in  
825 the model represent lumped sediment-water column rates and were resolved at the annual timescale. The  
826 use of water residence time as an independent variable in both the mechanistic model and the upscaling  
827 process introduces an important kinetic refinement to existing global N<sub>2</sub>O emission estimates. Rather than  
828 applying an average EF (directly scaling N<sub>2</sub>O emissions to N inputs) to all water bodies, the use of water  
829 residence time explicitly adjusts for the extent of N<sub>2</sub>O production and emission that is kinetically possible  
830 within the timeframe available in a given water body. Simulated N<sub>2</sub>O emission rates were evaluated against  
831 UNFCCC measurement-based upscaling methods applied to reservoirs (*Deemer et al.*, 2016) and rivers  
832 (*Hu et al.*, 2016) as well as a UNFCCC observation-driven regional estimate of lake N<sub>2</sub>O emissions based  
833 on literature data (*Lauerwald et al.*, 2019).

#### 834 835 **c. Meta analysis-based N<sub>2</sub>O emissions from large rivers**

836 Data from 70 published studies between 1998 and 2016 that provided N<sub>2</sub>O emission from streams and rivers  
837 were compiled by *Hu et al.* (2016). The N<sub>2</sub>O emission factors (EF = N<sub>2</sub>O /DIN) and emission rates (ER =  
838 EF \* DIN load, kg N<sub>2</sub>O-N yr<sup>-1</sup>) were calculated for each studied river. Exploratory multiple regression  
839 analyses were conducted to predict EF and ER using various combinations of factors (N concentrations,

840 loads, yields, DOC: DIN, discharge, and watershed area) and different functions. Among them, DIN yield  
 841 (kg N yr<sup>-1</sup> km<sup>-2</sup>) was identified as the best predictor of EF and ER. Using the optimal model and DIN loads  
 842 for 6400 global rivers calculated by the NEWS2-DIN-S model (McCrackin et al., 2014), we estimated  
 843 global riverine N<sub>2</sub>O emissions (Hu et al., 2016).

844  
 845 **d. Stream and river N<sub>2</sub>O emissions combining machine-learning and model-based upscaling**

846 Marzadri et al. (2021) developed a novel approach that combines a data-driven Random Forest Machine  
 847 Learning (RM-ML) model with a physically-based upscaling model to predict near global (neglecting  
 848 Arctic and Antarctic areas) riverine N<sub>2</sub>O emissions flux (F\*N<sub>2</sub>O given by the ratio between the flux of N<sub>2</sub>O,  
 849 FN<sub>2</sub>O, and the in-stream flux of dissolved inorganic nitrogen species FDIN) from both surface (i.e. water  
 850 column) and subsurface (i.e. benthic zone and hyporheic zone) riverine environments. In particular, to  
 851 capture the local scale processes responsible for N<sub>2</sub>O emissions and to provide estimations at different  
 852 spatial scales (from local reach up to the global scale) the model compute two different denitrification  
 853 Damköhler numbers (given by the ratio between a characteristics time of transport and a characteristics  
 854 time of denitrification (Marzadri et al., 2021; Marzadri et al., 2017)) starting from the hydro-morphological  
 855 and biogeochemical information provided by the RM-ML model. Model results at the local reach scale  
 856 shows that nearly 50% of the riverine N<sub>2</sub>O emissions comes from small streams (i.e. widths lower than 10  
 857 m, although they represent only the 13% of the total riverine surface area worldwide) while at the large  
 858 scale predict a near-global annual riverine N<sub>2</sub>O emissions around 72.8 GgN<sub>2</sub>O – N/yr.

859  
 860 **e. Meta-analysis based N<sub>2</sub>O emissions from estuaries and coastal vegetation**

861 N<sub>2</sub>O emissions from estuaries and coastal vegetated ecosystems were obtained from a meta-analysis of  
 862 observed N<sub>2</sub>O fluxes (Rosentreter et al., 2023). In brief, the meta-data analysis relies on a categorization of  
 863 estuaries into ‘tidal systems and deltas’, ‘lagoons’, and ‘fjords’. Water-air N<sub>2</sub>O fluxes from 123 estuary  
 864 sites globally were then compiled from peer-reviewed publications until the end of 2020. Coastal vegetation  
 865 comprises ‘mangrove’, ‘salt marsh’, and ‘seagrass’ ecosystems and N<sub>2</sub>O sediment-water-air fluxes were  
 866 compiled from 55 sites globally from peer-reviewed publications until the end of 2020. A non-parametric  
 867 bootstrapping method (1000 iterations of the median of samples) was used to resample N<sub>2</sub>O fluxes per unit  
 868 area for each estuary and coastal vegetation type in each of the 18 regions using the ‘boot’ function in the  
 869 package ‘boot’ in R software. Results from the bootstrapping output (minimum, Q1, median, mean, Q3,  
 870 maximum) were then scaled to the surface area of each estuary and coastal vegetation type in each of the  
 871 18 RECCAP regions. If an ecosystem type had less than three sites in a region, we applied the global  
 872 statistics of this type in this region. Note that the meta-data analysis only provides flux assessments at the  
 873 scale of the 18 regions.

874  
 875 **SI-11 Atmospheric inversion models**

876 Emissions were estimated using four independent atmospheric inversion frameworks (see Table 1). The  
 877 frameworks all used a Bayesian inversion method. The approach used here finds the maximum posteriori  
 878 (MAP), or optimal, estimate of emissions, that is, those, which when coupled to a model of atmospheric  
 879 transport, provide the best agreement to observed N<sub>2</sub>O mixing ratios while being guided by their prior  
 880 probability. In this particular case, where both the likelihood and prior probability are assumed to be  
 881 distributed normally, the optimal emissions are equivalent to those that minimize the cost function,  
 882

$$883 \quad J(\mathbf{x}) = \frac{1}{2}(\mathbf{x} - \mathbf{x}_b)^T \mathbf{B}^{-1}(\mathbf{x} - \mathbf{x}_b) + \frac{1}{2}(\mathbf{y} - H(\mathbf{x}))^T \mathbf{R}^{-1}(\mathbf{y} - H(\mathbf{x})) \quad (27)$$

884  
 885 where  $\mathbf{x}$  and  $\mathbf{x}_b$  are, respectively, vectors of the multivariate means of the posterior and prior emission  
 886 distributions,  $\mathbf{B}$  is the prior error covariance matrix for emissions,  $\mathbf{y}$  is a vector of observed N<sub>2</sub>O mixing  
 887 ratios,  $\mathbf{R}$  is the observation error covariance matrix, and  $H(\mathbf{x})$  is the model of atmospheric transport (for

888 details on the inversion method see (Tarantola, 2005)). The optimal emissions,  $\mathbf{x}$ , were found by solving  
889 the first order derivative of equation (21):  
890

$$891 \quad J'(\mathbf{x}) = \mathbf{B}^{-1}(\mathbf{x} - \mathbf{x}_b) + (H'(\mathbf{x}))^T \mathbf{R}^{-1}(\mathbf{y} - H(\mathbf{x})) = 0 \quad (28)$$

892 where  $(H'(\mathbf{x}))^T$  is the sensitivity of the atmospheric observations to emissions, derived from an adjoint  
893 model of transport. In frameworks INVICAT, PyVAR-CAMS and GEOS-Chem, equation (5b) was solved  
894 using a variational approach (Thompson et al., 2014; Wells et al., 2015; Wilson et al., 2014), which uses a  
895 descent algorithm and computations involving the forward and adjoint models. In framework MIROC4-  
896 ACTM (Patra et al., 2018), equation (22) was solved directly by computing a transport operator,  $\mathbf{H}$  from  
897 integrations of the forward model, such that  $\mathbf{H}\mathbf{x}$  is equivalent to  $H(\mathbf{x})$ , and taking the transpose of  $\mathbf{H}$  (Patra  
898 et al., 2022).  
899

900  
901 Each of the inversion frameworks used a different model of atmospheric transport with different horizontal  
902 and vertical resolutions (see Table 1). The transport models TOMCAT and LMDz5, used in INVICAT and  
903 PyVAR-CAMS respectively, were driven by ECMWF ERA-5 and ERA-Interim wind fields respectively,  
904 MIROC4-ACTM was driven by JRA-55 wind fields, and GEOS-Chem was driven by MERRA-2 wind  
905 fields. While INVICAT, PyVAR-CAMS, and GEOS-Chem optimized the emissions at the spatial  
906 resolution of the transport model, MIROC4-ACTM optimized the error in the emissions aggregated into 84  
907 land and ocean regions. All frameworks optimized the emissions with monthly temporal resolution. The  
908 transport models included an online calculation of the loss of  $\text{N}_2\text{O}$  in the stratosphere due to photolysis and  
909 oxidation by  $\text{O}(^1\text{D})$  resulting in mean atmospheric lifetimes of between 118 and 129 years, broadly  
910 consistent with recent independent estimates of the lifetime of  $116 \pm 9$  yr (Prather et al., 2015)).  
911

912 All inversions used  $\text{N}_2\text{O}$  measurements of discrete air samples from the National Oceanic and Atmospheric  
913 Administration Carbon Cycle Cooperative Global Air Sampling Network (NOAA). In addition, discrete  
914 measurements from the Commonwealth Scientific and Industrial Research Organisation network (CSIRO)  
915 as well as in-situ measurements from the Advanced Global Atmospheric Gases Experiment network  
916 (AGAGE), the NOAA CATS network, and from individual sites operated by University of Edinburgh (UE),  
917 National Institute for Environmental Studies (NIES), the Finnish Meteorological Institute (FMI) and the  
918 Japan Meteorological Agency (JMA) were included in INVICAT, PyVAR-CAMS and GEOS-Chem.  
919 Measurements from networks other than NOAA were corrected to the NOAA calibration scale, NOAA-  
920 2006A, using the results of the WMO Round Robin inter-comparison experiment  
921 (<https://www.esrl.noaa.gov/gmd/ccgg/wmorr/>), where available. For AGAGE and CSIRO, which did not  
922 participate in the WMO Round Robins, the data at sites where NOAA discrete samples are also collected  
923 were used to calculate a linear regression with NOAA data, which was applied to adjust the data to the  
924 NOAA-2006A scale. For the remaining CSIRO sites where there were no NOAA discrete samples, the  
925 mean regression coefficient and offset from all other CSIRO sites were used. The inversions used the  
926 discrete sample measurements without averaging, and hourly or daily means of the in-situ measurements,  
927 depending on the particular inversion framework.  
928

929 Each framework applied its own method for calculating the observation space uncertainty, the square of  
930 which gives the diagonal elements of the observation error covariance matrix  $\mathbf{R}$ . The observation space  
931 uncertainty accounts for measurement and model representation errors and is equal to the quadratic sum of  
932 these terms. Typical values for the observation space uncertainty were between 0.3 and 0.5 ppb for all  
933 inversion frameworks.  
934

935 Prior mean emissions were based on estimates from terrestrial biosphere and ocean biogeochemistry models  
936 as well as from inventories. INVICAT, PyVAR-CAMS and GEOS-Chem used the same prior estimates for  
937 emissions from natural and agricultural soils from the model OCN v1.1 (Zaehle et al., 2011) and for biomass

938 burning emissions from GFEDv4.1s. For non-soil anthropogenic emissions (namely those from energy,  
939 industry and waste sectors), INVICAT, PyVAR-CAMS, and GEOS-Chem used EDGAR v5. MIROC4-  
940 ACTM used the VISIT model (*Inatomi et al., 2010; Ito et al., 2018*) for emissions from natural soils and  
941 EDGAR 4.2 for all anthropogenic emissions, including agricultural waste burning, but did not explicitly  
942 include a prior estimate for wildfire emissions.  
943

944 For the prior mean estimate of ocean fluxes, INVICAT, PyVAR-CAMS and GEOS-Chem used the  
945 prognostic version of the PlankTOM-v10.2 model (*Buitenhuis et al., 2018*) with a global total source 2.5  
946 TgN yr<sup>-1</sup>. Prior uncertainties were estimated in all the inversion frameworks for each grid cell (INVICAT,  
947 PyVAR-CAMS and GEOS-Chem) or for each region (MIROC4-ACTM) and the square of these  
948 uncertainties formed the diagonal elements of the prior error covariance matrix **B**. INVICAT, PyVAR-  
949 CAMS and GEOS-Chem estimated the uncertainty as proportional to the prior value in each grid cell, but  
950 MIROC4-ACTM set the uncertainty uniformly for land regions at 1 Tg N yr<sup>-1</sup> and for ocean regions at 0.5  
951 Tg N yr<sup>-1</sup>. INVICAT also included off-diagonal covariances in **B** corresponding to a spatial correlation  
952 between flux uncertainties of 500 km and assumed a semi-exponential distribution of uncertainties so as to  
953 restrict the possibility of negative fluxes.  
954

954

955

956

### SI-12 Atmospheric N<sub>2</sub>O Observation Networks

957 The NOAA Network: For atmospheric N<sub>2</sub>O observations from the NOAA network (Dutton et al. 2023), we  
958 used global mean mixing ratios from the NOAA Global Monitoring Laboratory (GML) (combined dataset  
959 based on measurements from five different measurement programs [HATS old flask instrument, HATS  
960 current flask instrument (OTTO), the Carbon Cycle and Greenhouse Gases (CCGG) group Cooperative  
961 Global Air Sampling Network (<https://www.esrl.noaa.gov/gmd/ccgg/flask.php>), HATS in situ (RITS  
962 program), and HATS in situ (CATS program)]. CCGG provides uncertainties with each measurement (see  
963 site files: [ftp://aftp.cmdl.noaa.gov/data/greenhouse\\_gases/n2o/flask/surface/](ftp://aftp.cmdl.noaa.gov/data/greenhouse_gases/n2o/flask/surface/)). The CCGG measurements  
964 for N<sub>2</sub>O analysis from more than 50 sites globally was changed to tunable infrared laser direct absorption  
965 spectroscopy (TILDAS) in mid-2019 from gas chromatography. About 40 sites of them (mostly Marine  
966 Boundary Layer sites) are used to calculate CCGG monthly mean global N<sub>2</sub>O levels. Monthly mean  
967 observations from different NOAA measurement programs are statistically combined to create a long-term  
968 NOAA/ESRL GML dataset. Uncertainties (1 sigma) associated with monthly estimates of global mean  
969 N<sub>2</sub>O, are ~1 ppb from 1977–1987, 0.6 ppb from 1988–1994, 0.3–0.4 ppb from 1995–2000, and 0.1 ppb  
970 from 2001–2017. NOAA data are generally more consistent after 1995, with standard deviations on the  
971 monthly mean mixing ratios at individual sites of ~0.5 ppb from 1995–1998, and 0.1–0.4 ppb after 1998.  
972 A detailed description of these measurement programs and the method to combine them are available via  
973 <https://www.esrl.noaa.gov/gmd/hats/combined/N2O.html>.

974 THE AGAGE network: The Advanced Global Atmospheric Gases Experiment (AGAGE) global network  
975 (and its predecessors ALE and GAGE) (Prinn et al., 2018) has made continuous high-frequency gas  
976 chromatographic (GC) measurements with electronic capture detection (ECD) of N<sub>2</sub>O at five globally  
977 distributed sites since 1978. Improved GC/ECD methods have been deployed over time resulting in N<sub>2</sub>O  
978 measurement precision of about 0.35% in ALE, 0.13% in GAGE (Prinn et al., 1990) and 0.05% in AGAGE  
979 (Prinn et al., 2008; 2018). We used the global mean of AGAGE N<sub>2</sub>O measurements during 1980–2020  
980 which are reported on the Scripps Institution of Oceanography SIO-16 scale. Further information on  
981 AGAGE stations, instruments, calibration, uncertainties and access to data is available at the AGAGE Data  
982 website: <https://www.osti.gov/dataexplorer/biblio/dataset/1841748>.

983

984 The CSIRO network: The CSIRO flask network (Francey et al., 2003) consists of nine sampling sites  
985 distributed globally and has been in operation since 1992. Flask samples are collected approximately every  
986 two weeks and shipped back to CSIRO GASLAB for analysis. Samples were analyzed by gas  
987 chromatography with electron capture detection (GC-ECD). One Shimadzu gas chromatograph labelled  
988 “Shimadzu-1” (S1) has been used over the entire length of the record and the measurement precision for

989 N<sub>2</sub>O from this instrument is about 0.1%. N<sub>2</sub>O data from the CSIRO global flask network are reported on  
 990 the NOAA-2006A N<sub>2</sub>O scale and are archived at the World Data Centre for Greenhouse Gases (WDCGG:  
 991 <https://gaw.kishou.go.jp/>). Nine sites from the CSIRO network were used to calculate the annual global  
 992 N<sub>2</sub>O mole fractions. Smooth curve fits to the N<sub>2</sub>O data from each of these sites were calculated using the  
 993 technique outlined in Thoning et al. (1989), using a short-term cut-off of 80 days. The smooth curve fit data  
 994 were then placed on an evenly spaced latitude (5 degree) versus time (weekly) grid using the Kriging  
 995 interpolation technique. Finally, the gridded data were used to calculate the global annual values.

996  
 997 Table SI-3 Factors used to convert N<sub>2</sub>O in various units (by convention Unit 1=Unit 2 × conversion)

| Unit 1                                              | Unit 2                       | Conversion        |
|-----------------------------------------------------|------------------------------|-------------------|
| Tg N <sub>2</sub> O (teragrams of N <sub>2</sub> O) | Tg N (teragrams of nitrogen) | 1.57              |
| Tg N (teragrams of nitrogen)                        | g N (grams of nitrogen)      | 10 <sup>-12</sup> |
| Tg N (teragrams of nitrogen)                        | ppb (parts per billion)      | 4.79              |

998  
 999 Table SI-4 Atmospheric N<sub>2</sub>O dry mole fraction measured by different observing networks during 2000-  
 1000 2022.

| ppb  | NOAA   | AGAGE  | CSIRO  | Min    | Max    |
|------|--------|--------|--------|--------|--------|
| 2000 | 315.58 | 316.18 | 315.48 | 315.48 | 316.18 |
| 2001 | 316.33 | 316.95 | 316.12 | 316.12 | 316.95 |
| 2002 | 316.99 | 317.54 | 316.67 | 316.67 | 317.54 |
| 2003 | 317.64 | 318.26 | 317.31 | 317.31 | 318.26 |
| 2004 | 318.24 | 318.99 | 317.99 | 317.99 | 318.99 |
| 2005 | 318.98 | 319.71 | 318.83 | 318.83 | 319.71 |
| 2006 | 319.93 | 320.39 | 319.58 | 319.58 | 320.39 |
| 2007 | 320.59 | 321.16 | 320.34 | 320.34 | 321.16 |
| 2008 | 321.54 | 322.11 | 321.45 | 321.45 | 322.11 |
| 2009 | 322.24 | 322.91 | 322.22 | 322.22 | 322.91 |
| 2010 | 323.04 | 323.77 | 323.08 | 323.04 | 323.77 |
| 2011 | 324.21 | 324.68 | 324.09 | 324.09 | 324.68 |
| 2012 | 325.01 | 325.65 | 324.99 | 324.99 | 325.65 |
| 2013 | 325.92 | 326.61 | 325.89 | 325.89 | 326.61 |
| 2014 | 327.06 | 327.66 | 326.93 | 326.93 | 327.66 |
| 2015 | 328.13 | 328.52 | 327.99 | 327.99 | 328.52 |
| 2016 | 328.94 | 329.36 | 328.77 | 328.77 | 329.36 |
| 2017 | 329.75 | 330.37 | 329.68 | 329.68 | 330.37 |



|      |        |        |        |        |        |
|------|--------|--------|--------|--------|--------|
| 2018 | 330.87 | 331.53 | 330.90 | 330.87 | 331.53 |
| 2019 | 331.85 | 332.35 | 331.66 | 331.66 | 332.35 |
| 2020 | 333.06 | 333.48 | 332.70 | 332.70 | 333.48 |
| 2021 | 334.33 | 334.81 | 334.03 | 334.03 | 334.81 |
| 2022 | 335.71 | 336.09 | 335.57 | 335.57 | 336.09 |

1001

1002

1003 Table SI-5: Uncertainty in future projections of atmospheric N<sub>2</sub>O dry mole fraction.

| ppb  | SSP1-1.9 |       | SSP1-2.6 |       | SSP2-4.5 |       | SSP3-7.0 |       | SSP4-3.4 |       | SSP4-6.0 |       | SSP5-8.5 |       |
|------|----------|-------|----------|-------|----------|-------|----------|-------|----------|-------|----------|-------|----------|-------|
|      | Min      | Max   |
| 2020 | 330.4    | 331.1 | 330.4    | 331.1 | 331.0    | 331.6 | 331.4    | 332.0 | 331.2    | 331.5 | 331.2    | 331.4 | 331.2    | 331.9 |
| 2030 | 335.1    | 336.9 | 335.5    | 337.0 | 337.6    | 339.6 | 339.5    | 342.2 | 337.5    | 338.6 | 338.8    | 339.6 | 339.5    | 341.1 |
| 2040 | 336.2    | 341.1 | 336.8    | 342.0 | 343.2    | 347.3 | 347.9    | 353.4 | 340.5    | 345.7 | 346.3    | 349.2 | 349.2    | 350.7 |
| 2050 | 336.2    | 344.6 | 337.8    | 345.7 | 348.5    | 354.3 | 356.1    | 364.9 | 343.3    | 353.3 | 353.5    | 359.2 | 359.4    | 361.2 |

1004

1005 **References:**

1006

1007 Adalibieke, W., Cui X.Q., Cai H.W., You L.Z., and Zhou F.: Global crop-specific nitrogen fertilization  
 1008 dataset in 1961-2020, *Scientific Data* 10, 617, 2023, <https://www.nature.com/articles/s41597-023-02526-z>

1009 Asaadi, A., and Arora, V. K.: Implementation of nitrogen cycle in the CLASSIC land model,  
 1010 *Biogeosciences*, 18(2), 669-706, 2021.

1011 Aumont, O., Éthé, C., Tagliabue, A., Bopp, L., and Gehlen, M.: PISCES-v2: an ocean biogeochemical  
 1012 model for carbon and ecosystem studies, *Geoscientific Model Development Discussions*, 8(2), 1375-1509,  
 1013 2015.

1014 Battaglia, G., and Joos, F.: Marine N<sub>2</sub>O emissions from nitrification and denitrification constrained by  
 1015 modern observations and projected in multimillennial global warming simulations, *Global Biogeochemical*  
 1016 *Cycles*, 32(1), 92-121, 2018.

1017 Beaulieu, J. J., Tank, J. L., Hamilton, S. K., Wollheim, W. M., Hall Jr, R. O., Mulholland, P. J., Peterson,  
 1018 B. J., Ashkenas, L. R., Cooper, L. W., and Dahm, C. N. : Nitrous oxide emission from denitrification in  
 1019 stream and river networks, *Proceedings of the National Academy of Sciences*, 108(1), 214-219, 2011.

1020 Berdanier, A. B., and Conant, R. T.: Regionally differentiated estimates of cropland N<sub>2</sub>O emissions reduce  
 1021 uncertainty in global calculations, *Global Change Biology*, 18(3), 928-935, 2012.

1022 Berthet, S., Jouanno, J., Séférian, R., Gehlen, M., and Llovel, W.: How does the phytoplankton–light  
 1023 feedback affect the marine N<sub>2</sub>O inventory?, *Earth System Dynamics*, 14(2), 399-412, 2023.

1024 Berthet, S., Séférian, R., Bricaud, C., Chevallier, M., Voldoire, A., and Ethé, C.: Evaluation of an online  
 1025 grid-coarsening algorithm in a global eddy-admitting ocean biogeochemical model, *Journal of Advances in*  
 1026 *Modeling Earth Systems*, 11(6), 1759-1783, 2019.

1027 Bouwman, A. F., Beusen, A. H. W., and Billen, G. : Human alteration of the global nitrogen and phosphorus  
 1028 soil balances for the period 1970–2050, *Global Biogeochemical Cycles*, 23(4), 2009.

- 1029 Bouwman, A. F., Beusen, A. H. W., Overbeek, C. C., Bureau, D. P., Pawlowski, M., and Glibert, P. M.:  
 1030 Hindcasts and future projections of global inland and coastal nitrogen and phosphorus loads due to finfish  
 1031 aquaculture, *Reviews in Fisheries Science*, 21(2), 112-156, 2013.
- 1032 Bouwman, A. F., Pawłowski, M., Liu, C., Beusen, A. H. W., Shumway, S. E., Glibert, P. M., and Overbeek,  
 1033 C. C.: Global hindcasts and future projections of coastal nitrogen and phosphorus loads due to shellfish and  
 1034 seaweed aquaculture, *Reviews in Fisheries Science*, 19(4), 331-357, 2011.
- 1035 Buendia, E., Tanabe, K., Kranjc, A., Baasansuren, J., Fukuda, M., Ngarize, S., Osako, A., Pyrozhenko, Y.,  
 1036 Shermanau, P., and Federici, S.: 2019 Refinement to the 2006 IPCC Guidelines for National Greenhouse  
 1037 Gas Inventories *Rep.*, 2019.
- 1038 Buitenhuis, E. T., Suntharalingam, P., and Le Quéré, C.: Constraints on global oceanic emissions of N<sub>2</sub>O  
 1039 from observations and models, *Biogeosciences*, 15(7), 2161-2175, 2018.
- 1040 Carroll, D., Menemenlis, D., Adkins, J. F., Bowman, K. W., Brix, H., Dutkiewicz, S., Fenty, I., Gierach,  
 1041 M. M., Hill, C., and Jahn, O.: The ECCO-Darwin data-assimilative global ocean biogeochemistry model:  
 1042 Estimates of seasonal to multidecadal surface ocean pCO<sub>2</sub> and air-sea CO<sub>2</sub> flux, *Journal of Advances in*  
 1043 *Modeling Earth Systems*, 12(10), e2019MS001888, 2020.
- 1044 Chatskikh, D., Olesen, J. E., Berntsen, J., Regina, K., and Yamulki, S.: Simulation of effects of soils, climate  
 1045 and management on N<sub>2</sub>O emission from grasslands, *Biogeochemistry*, 76, 395-419, 2005.
- 1046 Crippa, M., Solazzo, E., Guizzardi, D., Monforti-Ferrario, F., Tubiello, F. N., and Leip, A.: Food systems  
 1047 are responsible for a third of global anthropogenic GHG emissions, *Nature Food*, 2(3), 198-209, 2021.
- 1048 Crippa, M., Solazzo, E., Guizzardi, D., Van Dingenen, R., and Leip, A.: Air pollutant emissions from global  
 1049 food systems are responsible for environmental impacts, crop losses and mortality, *Nature Food*, 1-15,  
 1050 2022.
- 1051 Cui, X., Zhou, F., Ciais, P., Davidson, E. A., Tubiello, F. N., Niu, X., Ju, X., Canadell, J. G., Bouwman, A.  
 1052 F., and Jackson, R. B.: Global mapping of crop-specific emission factors highlights hotspots of nitrous  
 1053 oxide mitigation, *Nature Food*, 2(11), 886-893, 2021.
- 1054 Davidson, E. A., de Carvalho, C. J. R., Figueira, A. M., Ishida, F. Y., Ometto, J. P. H. B., Nardoto, G. B.,  
 1055 Sabá, R. T., Hayashi, S. N., Leal, E. C., and Vieira, I. C. G.: Recuperation of nitrogen cycling in Amazonian  
 1056 forests following agricultural abandonment, *Nature*, 447(7147), 995-998, 2007.
- 1057 Davidson, E. A., Keller, M., Erickson, H. E., Verchot, L. V., and Veldkamp, E.: Testing a conceptual model  
 1058 of soil emissions of nitrous and nitric oxides: using two functions based on soil nitrogen availability and  
 1059 soil water content, the hole-in-the-pipe model characterizes a large fraction of the observed variation of  
 1060 nitric oxide and nitrous oxide emissions from soils, *Bioscience*, 50(8), 667-680, 2000.
- 1061 Decock, C.: Mitigating nitrous oxide emissions from corn cropping systems in the midwestern US: Potential  
 1062 and data gaps, *Environmental Science & Technology*, 48(8), 4247-4256, 2014.
- 1063 Deemer, B. R., Harrison, J. A., Li, S., Beaulieu, J. J., DelSontro, T., Barros, N., Bezerra-Neto, J. F., Powers,  
 1064 S. M., Dos Santos, M. A., and Vonk, J. A.: Greenhouse gas emissions from reservoir water surfaces: a new  
 1065 global synthesis, *BioScience*, 66(11), 949-964, 2016.
- 1066 Del Grosso, S. J., Parton, W. J., Mosier, A. R., Ojima, D. S., Kulmala, A. E., and Phongpan, S.: General  
 1067 model for N<sub>2</sub>O and N<sub>2</sub> gas emissions from soils due to denitrification, *Global biogeochemical cycles*, 14(4),  
 1068 1045-1060, 2000.
- 1069 Döll, P., and Lehner, B.: Validation of a new global 30-min drainage direction map, *Journal of Hydrology*,  
 1070 258(1-4), 214-231, 2002.

- 1071 Dürr, H. H., Laruelle, G. G., van Kempen, C. M., Slomp, C. P., Meybeck, M., and Middelkoop, H.:  
 1072 Worldwide typology of nearshore coastal systems: defining the estuarine filter of river inputs to the oceans,  
 1073 *Estuaries Coasts*, 34, 441-458, 2011.
- 1074 Eggleston, H. S., Buendia, L., Miwa, K., Ngara, T., and Tanabe, K. : 2006 IPCC guidelines for national  
 1075 greenhouse gas inventories, 2006.
- 1076 FAO (2020), FAO Fisheries and Aquaculture - FishStatJ - Software for Fishery and Aquaculture Statistical  
 1077 Time Series. In: FAO Fisheries and Aquaculture Division [online]. Rome. [Cited 3 November 2021]. ,  
 1078 edited.
- 1079 FAO (2022), FAOSTAT Climate Change, Emissions, Emissions Totals, edited.
- 1080 Ganesan, A. L., Manizza, M., Morgan, E. J., Harth, C. M., Kozlova, E., Lueker, T., Manning, A. J., Lunt,  
 1081 M. F., Mühle, J., and Lavric, J. V.: Marine nitrous oxide emissions from three Eastern Boundary Upwelling  
 1082 Systems inferred from atmospheric observations, *Geophysical Research Letters*, 47(14), e2020GL087822,  
 1083 2020.
- 1084 Goldewijk, K. K., Beusen, A., Doelman, J., and Stehfest, E.: Anthropogenic land use estimates for the  
 1085 Holocene–HYDE 3.2, *Earth System Science Data*, 9(2), 927-953, 2017.
- 1086 Hall, B. D., Dutton, G. S., and Elkins, J. W.: The NOAA nitrous oxide standard scale for atmospheric  
 1087 observations, *Journal of Geophysical Research: Atmospheres*, 112(D9), 2007.
- 1088 Harris, I. P. D. J., Jones, P. D., Osborn, T. J., and Lister, D. H.: Updated high-resolution grids of monthly  
 1089 climatic observations—the CRU TS3. 10 Dataset, *International journal of climatology*, 34(3), 623-642,  
 1090 2014.
- 1091 Heinen, M.: Simplified denitrification models: overview and properties, *Geoderma*, 133(3-4), 444-463,  
 1092 2006.
- 1093 Helgason, B. L., Janzen, H. H., Chantigny, M. H., Drury, C. F., Ellert, B. H., Gregorich, E. G., Lemke, R.  
 1094 L., Pattey, E., Rochette, P., and Wagner-Riddle, C.: Toward improved coefficients for predicting direct  
 1095 N<sub>2</sub>O emissions from soil in Canadian agroecosystems, *Nutrient Cycling in Agroecosystems*, 72, 87-99,  
 1096 2005.
- 1097 Hénault, C., Bizouard, F., Laville, P., Gabrielle, B., Nicoullaud, B., Germon, J. C., and Cellier, P.:  
 1098 Predicting in situ soil N<sub>2</sub>O emission using NOE algorithm and soil database, *Global Change Biology*, 11(1),  
 1099 115-127, 2005.
- 1100 Hersbach, H., Bell, B., Berrisford, P., Hirahara, S., Horányi, A., Muñoz-Sabater, J., Nicolas, J., Peubey, C.,  
 1101 Radu, R., and Schepers, D.: Complete ERA5 from 1979: Fifth generation of ECMWF atmospheric  
 1102 reanalyses of the global climate, *Copernicus Climate Change Service Data Store*, 2017.
- 1103 Hickman, J. E., Scholes, R. J., Rosenstock, T. S., Garcia-Pando, C. P., and Nyamangara, J.: Assessing non-  
 1104 CO<sub>2</sub> climate-forcing emissions and mitigation in sub-Saharan Africa, *Current Opinion in Environmental  
 1105 Sustainability*, 9, 65-72, 2014.
- 1106 Hu, M., Chen, D., and Dahlgren, R. A.: Modeling nitrous oxide emission from rivers: a global assessment,  
 1107 *Global Change Biology*, 22(11), 3566-3582, 2016.
- 1108 Huang, Y., and Gerber, S.: Global soil nitrous oxide emissions in a dynamic carbon-nitrogen model,  
 1109 *Biogeosciences*, 12(21), 6405-6427, 2015.
- 1110 Hurtt, G. C., Chini, L., Sahajpal, R., Frohking, S., Bodirsky, B. L., Calvin, K., Doelman, J. C., Fisk, J.,  
 1111 Fujimori, S., and Klein Goldewijk, K.: Harmonization of global land use change and management for the  
 1112 period 850–2100 (LUH2) for CMIP6, *Geoscientific Model Development*, 13(11), 5425-5464, 2020.
- 1113 IEA: World Energy Outlook 2021Rep., IEA, Paris, 2021.

1114 Inatomi, M., Ito, A., Ishijima, K., and Murayama, S.: Greenhouse gas budget of a cool-temperate deciduous  
1115 broad-leaved forest in Japan estimated using a process-based model, *Ecosystems*, *13*, 472-483, 2010.

1116 IPCC: Revised 1996 IPCC Guidelines for National Greenhouse Gas Inventories, 1996.

1117 IPCC: Good practice guidance and uncertainty management in national greenhouse gas inventories, 2000.

1118 IPCC: IPCC Guidelines for National Greenhouse Gas Inventories *Rep.*, Hayama, Japan, 2006.

1119 Ito, A., Nishina, K., Ishijima, K., Hashimoto, S., and Inatomi, M.: Emissions of nitrous oxide (N<sub>2</sub>O) from  
1120 soil surfaces and their historical changes in East Asia: a model-based assessment, *Progress in Earth  
1121 Planetary Science*, *5*, 1-13, 2018.

1122 Janssens-Maenhout, G., Crippa, M., Guizzardi, D., Muntean, M., Schaaf, E., Dentener, F., Bergamaschi,  
1123 P., Pagliari, V., Olivier, J. G., and Peters, J. A.: EDGAR v4. 3.2 Global Atlas of the three major greenhouse  
1124 gas emissions for the period 1970–2012, *Earth System Science Data*, *11*(3), 959-1002, 2019.

1125 Jin, X., and Gruber, N.: Offsetting the radiative benefit of ocean iron fertilization by enhancing N<sub>2</sub>O  
1126 emissions, *Geophysical research letters*, *30*(24), 2003.

1127 Johnson, D. J., Niedbalski, N. P., Ervin, J. S., and Patnaik, S. S.: Ammonium carbamate-based heat  
1128 exchanger reactor as an endothermic heat sink for thermal management, *International Journal of Heat Mass  
1129 Transfer*, *91*, 766-776, 2015.

1130 Kalnay, E., Kanamitsu, M., Kistler, R., Collins, W., Deaven, D., Gandin, L., Iredell, M., Saha, S., White,  
1131 G., and Woollen, J.: The NCEP/NCAR 40-year reanalysis project, *Bulletin of the American meteorological  
1132 Society*, *77*(3), 437-472, 1996.

1133 Keller, M., and Reiners, W. A.: Soil-atmosphere exchange of nitrous oxide, nitric oxide, and methane under  
1134 secondary succession of pasture to forest in the Atlantic lowlands of Costa Rica, *Global Biogeochemical  
1135 Cycles*, *8*(4), 399-409, 1994.

1136 Kim, D.-G., Giltrap, D., and Hernandez-Ramirez, G.: Background nitrous oxide emissions in agricultural  
1137 and natural lands: a meta-analysis, *Plant Soil*, *373*, 17-30, 2013a.

1138 Kim, D.-G., Hernandez-Ramirez, G., and Giltrap, D.: Linear and nonlinear dependency of direct nitrous  
1139 oxide emissions on fertilizer nitrogen input: A meta-analysis, *Agriculture, Ecosystems Environment*, *168*,  
1140 53-65, 2013b.

1141 Kock, A., and Bange, H. W.: Counting the ocean's greenhouse gas emissions, *Eos: Earth Space Science  
1142 News*, *96*(3), 10-13, 2015.

1143 Kou Giesbrecht, S., and Arora, V. K.: Representing the dynamic response of vegetation to nitrogen  
1144 limitation via biological nitrogen fixation in the CLASSIC Land Model, *Global Biogeochemical Cycles*,  
1145 *36*(6), e2022GB007341, 2022.

1146 Landolfi, A., Somes, C. J., Koeve, W., Zamora, L. M., and Oschlies, A.: Oceanic nitrogen cycling and N<sub>2</sub>O  
1147 flux perturbations in the Anthropocene, *Global Biogeochemical Cycles*, *31*(8), 1236-1255, 2017.

1148 Laruelle, G. G., Landschützer, P., Gruber, N., Tison, J.-L., Delille, B., and Regnier, P.: Global high-  
1149 resolution monthly pCO<sub>2</sub> climatology for the coastal ocean derived from neural network interpolation,  
1150 *Biogeosciences*, *14*(19), 4545-4561, 2017.

1151 Lauerwald, R., Regnier, P., Figueiredo, V., Enrich-Prast, A., Bastviken, D., Lehner, B., Maavara, T., and  
1152 Raymond, P.: Natural lakes are a minor global source of N<sub>2</sub>O to the atmosphere, *Global Biogeochemical  
1153 Cycles*, *33*(12), 1564-1581, 2019.

1154 Le Quéré, C., Buitenhuis, E. T., Moriarty, R., Alvain, S., Aumont, O., Bopp, L., Chollet, S., Enright, C.,  
1155 Franklin, D. J., and Geider, R. J.: Role of zooplankton dynamics for Southern Ocean phytoplankton biomass  
1156 and global biogeochemical cycles, *Biogeosciences*, *13*(14), 4111-4133, 2016.

1157 Lehner, B., Liermann, C. R., Revenga, C., Vörösmarty, C., Fekete, B., Crouzet, P., Döll, P., Endejan, M.,  
1158 Frenken, K., and Magome, J. : High-resolution mapping of the world's reservoirs and dams for sustainable  
1159 river-flow management, *Frontiers in Ecology the Environment*, 9(9), 494-502, 2011.

1160 Lehner, B., Verdin, K., and Jarvis, A.: New global hydrography derived from spaceborne elevation data,  
1161 *Eos, Transactions American Geophysical Union*, 89(10), 93-94, 2008.

1162 Lehuger, S., Gabrielle, B., Laville, P., Lamboni, M., Loubet, B., and Cellier, P.: Predicting and mitigating  
1163 the net greenhouse gas emissions of crop rotations in Western Europe, *Agricultural Forest Meteorology*,  
1164 151(12), 1654-1671, 2011.

1165 Leppelt, T., Dechow, R., Gebbert, S., Freibauer, A., Lohila, A., Augustin, J., Drösler, M., Fiedler, S.,  
1166 Glatzel, S., and Höper, H.: Nitrous oxide emission budgets and land-use-driven hotspots for organic soils  
1167 in Europe, *Biogeosciences*, 11(23), 6595-6612, 2014.

1168 Lan, X., E.J. Dlugokencky, J.W. Mund, A.M. Crotwell, M.J. Crotwell, E. Moglia, M. Madronich, D. Neff  
1169 and K.W. Thoning (2022), Atmospheric Nitrous Oxide Dry Air  
1170 Mole Fractions from the NOAA GML Carbon Cycle Cooperative Global Air Sampling Network,  
1171 1997-2021, Version: 2022-11-21, <https://doi.org/10.15138/53g1-x417>

1172 Li, C., Aber, J., Stange, F., Butterbach-Bahl, K., and Papen, H.: A process-oriented model of N<sub>2</sub>O and NO  
1173 emissions from forest soils: 1. Model development, *Journal of Geophysical Research: Atmospheres*,  
1174 105(D4), 4369-4384, 2000.

1175 Li, C., Frolking, S., and Frolking, T. A.: A model of nitrous oxide evolution from soil driven by rainfall  
1176 events: 2. Model applications, *Journal of Geophysical Research: Atmospheres*, 97(D9), 9777-9783, 1992.

1177 Liang, J. H., Deutsch, C., McWilliams, J. C., Baschek, B., Sullivan, P. P., and Chiba, D.: Parameterizing  
1178 bubble-mediated air-sea gas exchange and its effect on ocean ventilation, *Global Biogeochemical Cycles*,  
1179 27(3), 894-905, 2013.

1180 Lu, C., and Tian, H.: Net greenhouse gas balance in response to nitrogen enrichment: perspectives from a  
1181 coupled biogeochemical model, *Global Change Biology*, 19(2), 571-588, 2013.

1182 Maavara, T., Lauerwald, R., Laruelle, G. G., Akbarzadeh, Z., Bouskill, N. J., Van Cappellen, P., and  
1183 Regnier, P.: Nitrous oxide emissions from inland waters: Are IPCC estimates too high?, *Global Change*  
1184 *Biology*, 25(2), 473-488, 2019.

1185 Madec, G.: NEMO ocean engine: Note du pole de modélisation, Institut Pierre-Simon Laplace (IPSL),  
1186 France, No 27 ISSN No 1288-1619, *France: IPSL*, 2008.

1187 Madec, G., Bourdallé-Badie, R., Bouttier, P.-A., Bricaud, C., Bruciaferri, D., Calvert, D., Chanut, J.,  
1188 Clementi, E., Coward, A., and Delrosso, D.: NEMO ocean engine, 2017.

1189 Manizza, M., Keeling, R. F., and Nevison, C. D.: On the processes controlling the seasonal cycles of the  
1190 air-sea fluxes of O<sub>2</sub> and N<sub>2</sub>O: A modelling study, *Tellus B: Chemical Physical Meteorology*, 64(1), 18429,  
1191 2012.

1192 Manizza, M., Menemenlis, D., Zhang, H., and Miller, C. E.: Modeling the recent changes in the Arctic  
1193 Ocean CO<sub>2</sub> sink (2006–2013), *Global Biogeochemical Cycles*, 33(3), 420-438, 2019.

1194 Martinez-Rey, J., Bopp, L., Gehlen, M., Tagliabue, A., and Gruber, N.: Projections of oceanic N<sub>2</sub>O  
1195 emissions in the 21st century using the IPSL Earth system model, *Biogeosciences*, 12(13), 4133-4148, 2015.

1196 Marzadri, A., Amatulli, G., Tonina, D., Bellin, A., Shen, L. Q., Allen, G. H., and Raymond, P. A.: Global  
1197 riverine nitrous oxide emissions: The role of small streams and large rivers, *Science of The Total*  
1198 *Environment*, 776, 145148, 2021.

- 1199 Marzadri, A., Dee, M. M., Tonina, D., Bellin, A., and Tank, J. L.: Role of surface and subsurface processes  
 1200 in scaling N<sub>2</sub>O emissions along riverine networks, *Proceedings of the National Academy of Sciences*,  
 1201 *114*(17), 4330-4335, 2017.
- 1202 McCrackin, M. L., Harrison, J. A., and Compton, J. E.: Factors influencing export of dissolved inorganic  
 1203 nitrogen by major rivers: A new, seasonal, spatially explicit, global model, *Global Biogeochemical Cycles*,  
 1204 *28*(3), 269-285, 2014.
- 1205 Melillo, J. M., Steudler, P. A., Feigl, B. J., Neill, C., Garcia, D., Piccolo, M. C., Cerri, C. C., and Tian, H.:  
 1206 Nitrous oxide emissions from forests and pastures of various ages in the Brazilian Amazon, *Journal of*  
 1207 *Geophysical Research: Atmospheres*, *106*(D24), 34179-34188, 2001.
- 1208 Messenger, M. L., Lehner, B., Grill, G., Nedeva, I., and Schmitt, O.: Estimating the volume and age of water  
 1209 stored in global lakes using a geo-statistical approach, *Nature Communications*, *7*(1), 13603, 2016.
- 1210 Nevison, C., Butler, J. H., and Elkins, J. W.: Global distribution of N<sub>2</sub>O and the ΔN<sub>2</sub>O-AOU yield in the  
 1211 subsurface ocean, *Global Biogeochemical Cycles*, *17*(4), 2003.
- 1212 Pan, S., Bian, Z., Tian, H., Yao, Y., Najjar, R. G., Friedrichs, M. A. M., Hofmann, E. E., Xu, R., and Zhang,  
 1213 B.: Impacts of multiple environmental changes on long-term nitrogen loading from the Chesapeake Bay  
 1214 watershed, *Journal of Geophysical Research: Biogeosciences*, *126*(5), e2020JG005826, 2021.
- 1215 Parekh, P., Joos, F., and Müller, S. A.: A modeling assessment of the interplay between aeolian iron fluxes  
 1216 and iron-binding ligands in controlling carbon dioxide fluctuations during Antarctic warm events,  
 1217 *Paleoceanography*, *23*(4), 2008.
- 1218 Parton, W. J., Mosier, A. R., Ojima, D. S., Valentine, D. W., Schimel, D. S., Weier, K., and Kulmala, A.  
 1219 E.: Generalized model for N<sub>2</sub> and N<sub>2</sub>O production from nitrification and denitrification, *Global*  
 1220 *biogeochemical cycles*, *10*(3), 401-412, 1996.
- 1221 Patra, P. K., Dlugokencky, E. J., Elkins, J. W., Dutton, G. S., Tohjima, Y., Sasakawa, M., Ito, A., Weiss,  
 1222 R. F., Manizza, M., and Krummel, P. B.: Forward and inverse modelling of atmospheric nitrous oxide using  
 1223 MIROC4-atmospheric chemistry-transport model, *Journal of the Meteorological Society of Japan. Ser. II*,  
 1224 *100*(2), 361-386, 2022.
- 1225 Patra, P. K., Takigawa, M., Watanabe, S., Chandra, N., Ishijima, K., and Yamashita, Y.: Improved chemical  
 1226 tracer simulation by MIROC4. 0-based atmospheric chemistry-transport model (MIROC4-ACTM), *Sola*,  
 1227 *14*, 91-96, 2018.
- 1228 Paulot, F., Jacob, D. J., Johnson, M. T., Bell, T. G., Baker, A. R., Keene, W. C., Lima, I. D., Doney, S. C.,  
 1229 and Stock, C. A.: Global oceanic emission of ammonia: Constraints from seawater and atmospheric  
 1230 observations, *Global Biogeochemical Cycles*, *29*(8), 1165-1178, 2015.
- 1231 Peltier, W. R.: Global glacial isostasy and the surface of the ice-age Earth: the ICE-5G (VM2) model and  
 1232 GRACE, *Annual Review of Earth and Planetary Sciences*, *32*, 111-149, 2004.
- 1233 Portmann, F. T., Siebert, S., and Döll, P.: MIRCA2000—Global monthly irrigated and rainfed crop areas  
 1234 around the year 2000: A new high-resolution data set for agricultural and hydrological modeling, *Global*  
 1235 *Biogeochemical Cycles*, *24*(1), 2010.
- 1236 Porwollik, V., Rolinski, S., Heinke, J., and Müller, C.: Generating a rule-based global gridded tillage  
 1237 dataset, *Earth System Science Data*, *11*(2), 823-843, 2019.
- 1238 Prather, M. J., Hsu, J., DeLuca, N. M., Jackman, C. H., Oman, L. D., Douglass, A. R., Fleming, E. L.,  
 1239 Strahan, S. E., Steenrod, S. D., and Søvde, O. A.: Measuring and modeling the lifetime of nitrous oxide  
 1240 including its variability, *Journal of Geophysical Research: Atmospheres*, *120*(11), 5693-5705, 2015.
- 1241 Rochette, P., and Janzen, H. H.: Towards a revised coefficient for estimating N<sub>2</sub>O emissions from legumes,  
 1242 *Nutrient Cycling in Agroecosystems*, *73*, 171-179, 2005.

- 1243 Rosentreter, J. A., Laruelle, G. G., Bange, H. W., Bianchi, T. S., Busecke, J. J. M., Cai, W.-J., Eyre, B. D.,  
 1244 Forbrich, I., Kwon, E. Y., and Maavara, T.: Coastal vegetation and estuaries are collectively a greenhouse  
 1245 gas sink, *Nature Climate Change*, 1-9, 2023.
- 1246 Sacks, W. J., Deryng, D., Foley, J. A., and Ramankutty, N.: Crop planting dates: an analysis of global  
 1247 patterns, *Global Ecology Biogeography*, 19(5), 607-620, 2010.
- 1248 Salas y Mélia, D.: A global coupled sea ice–ocean model, *Ocean Modelling*, 4(2), 137-172, 2002.
- 1249 Séférian, R., Nabat, P., Michou, M., Saint-Martin, D., Voldoire, A., Colin, J., Decharme, B., Delire, C.,  
 1250 Berthet, S., and Chevallier, M.: Evaluation of CNRM Earth System Model, CNRM-ESM2-1: role of Earth  
 1251 system processes in present-day and future climate, *Journal of Advances in Modeling Earth Systems*,  
 1252 11(12), 4182-4227, 2019.
- 1253 Shangguan, W., Dai, Y., Duan, Q., Liu, B., and Yuan, H.: A global soil data set for earth system modeling,  
 1254 *Journal of Advances in Modeling Earth Systems*, 6(1), 249-263, 2014.
- 1255 Shcherbak, I., Millar, N., and Robertson, G. P.: Global metaanalysis of the nonlinear response of soil nitrous  
 1256 oxide (N<sub>2</sub>O) emissions to fertilizer nitrogen, *Proceedings of the National Academy of Sciences*, 111(25),  
 1257 9199-9204, 2014.
- 1258 Shu, S., Jain, A. K., Koven, C. D., and Mishra, U.: Estimation of permafrost SOC stock and turnover time  
 1259 using a land surface model with vertical heterogeneity of permafrost soils, *Global Biogeochemical Cycles*,  
 1260 34(11), e2020GB006585, 2020.
- 1261 Solazzo, E., Crippa, M., Guizzardi, D., Muntean, M., Choulga, M., and Janssens-Maenhout, G.:  
 1262 Uncertainties in the Emissions Database for Global Atmospheric Research (EDGAR) emission inventory  
 1263 of greenhouse gases, *Atmospheric Chemistry Physics*, 21(7), 5655-5683, 2021.
- 1264 Stehfest, E., and Bouwman, L.: N<sub>2</sub>O and NO emission from agricultural fields and soils under natural  
 1265 vegetation: summarizing available measurement data and modeling of global annual emissions, *Nutrient*  
 1266 *cycling in agroecosystems*, 74, 207-228, 2006.
- 1267 Sullivan, B. W., Nifong, R. L., Nasto, M. K., Alvarez-Clare, S., Dencker, C. M., Soper, F. M., Shoemaker,  
 1268 K. T., Ishida, F. Y., Zaragoza-Castells, J., and Davidson, E. A.: Biogeochemical recuperation of lowland  
 1269 tropical forest during succession, *Ecology*, 100(4), e02641, 2019.
- 1270 Tarantola, A.: *Inverse problem theory and methods for model parameter estimation*, SIAM, 2005.
- 1271 Thompson, R. L., Chevallier, F., Crotwell, A. M., Dutton, G., Langenfelds, R. L., Prinn, R. G., Weiss, R.  
 1272 F., Tohjima, Y., Nakazawa, T., and Krummel, P. B.: Nitrous oxide emissions 1999 to 2009 from a global  
 1273 atmospheric inversion, *Atmospheric Chemistry Physics*, 14(4), 1801-1817, 2014.
- 1274 Thornton, P. E., and Rosenbloom, N. A. : Ecosystem model spin-up: Estimating steady state conditions in  
 1275 a coupled terrestrial carbon and nitrogen cycle model, *Ecological Modelling*, 189(1-2), 25-48, 2005.
- 1276 Tian, H., Bian, Z., Shi, H., Qin, X., Pan, N., Lu, C., Pan, S., Tubiello, F. N., Chang, J., and Conchedda, G.:  
 1277 History of anthropogenic Nitrogen inputs (HaNi) to the terrestrial biosphere: a 5 arcmin resolution annual  
 1278 dataset from 1860 to 2019, *Earth System Science Data*, 14(10), 4551-4568, 2022.
- 1279 Tian, H., Chen, G., Zhang, C., Liu, M., Sun, G., Chappelka, A., Ren, W., Xu, X., Lu, C., and Pan, S.:  
 1280 Century-scale responses of ecosystem carbon storage and flux to multiple environmental changes in the  
 1281 southern United States, *Ecosystems*, 15, 674-694, 2012a.
- 1282 Tian, H., Lu, C., Chen, G., Tao, B., Pan, S., Grosso, S. J. D., Xu, X., Bruhwiler, L., Wofsy, S. C., and Kort,  
 1283 E. A.: Contemporary and projected biogenic fluxes of methane and nitrous oxide in North American  
 1284 terrestrial ecosystems, *Frontiers in Ecology the Environment*, 10(10), 528-536, 2012b.



- 1285 Tian, H., Ren, W., Yang, J., Tao, B., Cai, W. J., Lohrenz, S. E., Hopkinson, C. S., Liu, M., Yang, Q., and  
 1286 Lu, C. : Climate extremes dominating seasonal and interannual variations in carbon export from the  
 1287 Mississippi River Basin, *Global Biogeochemical Cycles*, 29(9), 1333-1347, 2015.
- 1288 Tian, H., Xu, R., Canadell, J. G., Thompson, R. L., Winiwarter, W., Suntharalingam, P., Davidson, E. A.,  
 1289 Ciais, P., Jackson, R. B., Janssens-Maenhout, G., ..., and Yuanzhi, Y.: A comprehensive quantification of  
 1290 global nitrous oxide sources and sinks, *Nature*, 586(7828), 248-256, 2020a.
- 1291 Tian, H., Xu, R., Pan, S., Yao, Y., Bian, Z., Cai, W. J., Hopkinson, C. S., Justic, D., Lohrenz, S., and Lu,  
 1292 C.: Long-term trajectory of nitrogen loading and delivery from Mississippi River Basin to the Gulf of  
 1293 Mexico, *Global Biogeochemical Cycles*, 34(5), e2019GB006475, 2020b.
- 1294 Tian, H., Xu, X., Liu, M., Ren, W., Zhang, C., Chen, G., and Lu, C.: Spatial and temporal patterns of CH<sub>4</sub>  
 1295 and N<sub>2</sub>O fluxes in terrestrial ecosystems of North America during 1979–2008: application of a global  
 1296 biogeochemistry model, *Biogeosciences*, 7(9), 2673-2694, 2010.
- 1297 Tian, H., Xu, X., Lu, C., Liu, M., Ren, W., Chen, G., Melillo, J., and Liu, J.: Net exchanges of CO<sub>2</sub>, CH<sub>4</sub>,  
 1298 and N<sub>2</sub>O between China's terrestrial ecosystems and the atmosphere and their contributions to global  
 1299 climate warming, *Journal of Geophysical Research: Biogeosciences*, 116(G2), 2011.
- 1300 Tian, H., Yang, J., Lu, C., Xu, R., Canadell, J. G., Jackson, R. B., Arneeth, A., Chang, J., Chen, G., and  
 1301 Ciais, P.: The global N<sub>2</sub>O model intercomparison project, *Bulletin of the American Meteorological Society*,  
 1302 99(6), 1231-1251, 2018.
- 1303 Tian, H., R. Xu, S. Pan, Y. Yao, Z. Bian, W. J. Cai, C. S. Hopkinson, D. Justic, S. Lohrenz, C. Lu, W. Ren,  
 1304 and J. Yang. (2020). Long-Term Trajectory of Nitrogen Loading and Delivery From Mississippi River  
 1305 Basin to the Gulf of Mexico. *Global Biogeochemical Cycles*, 34(5), e2019GB006475.  
 1306 <https://doi.org/10.1029/2019GB006475>.
- 1307 Tschumi, T., Joos, F., Gehlen, M., and Heinze, C.: Deep ocean ventilation, carbon isotopes, marine  
 1308 sedimentation and the deglacial CO<sub>2</sub> rise, *Climate of the Past*, 7(3), 771-800, 2011.
- 1309 Tsujino, H., Urakawa, L. S., Griffies, S. M., Danabasoglu, G., Adcroft, A. J., Amaral, A. E., Arsouze, T.,  
 1310 Bentsen, M., Bernardello, R., and Böning, C. W.: Evaluation of global ocean–sea-ice model simulations  
 1311 based on the experimental protocols of the Ocean Model Intercomparison Project phase 2 (OMIP-2),  
 1312 *Geoscientific Model Development*, 13(8), 3643-3708, 2020.
- 1313 Tsujino, H., Urakawa, S., Nakano, H., Small, R. J., Kim, W. M., Yeager, S. G., Danabasoglu, G., Suzuki,  
 1314 T., Bamber, J. L., and Bentsen, M.: JRA-55 based surface dataset for driving ocean–sea-ice models (JRA55-  
 1315 do), *Ocean Modelling*, 130, 79-139, 2018.
- 1316 Van Drecht, G., Bouwman, A. F., Harrison, J., and Knoop, J. M.: Global nitrogen and phosphate in urban  
 1317 wastewater for the period 1970 to 2050, *Global Biogeochemical Cycles*, 23(4), 2009.
- 1318 Van Drecht, G., Bouwman, A. F., Knoop, J. M., Beusen, A. H. W., and Meinardi, C. R.: Global modeling  
 1319 of the fate of nitrogen from point and nonpoint sources in soils, groundwater, and surface water, *Global  
 1320 Biogeochemical Cycles*, 17(4), 2003.
- 1321 Verchot, L. V., Davidson, E. A., Cattânio, H., Ackerman, I. L., Erickson, H. E., and Keller, M.: Land use  
 1322 change and biogeochemical controls of nitrogen oxide emissions from soils in eastern Amazonia, *Global  
 1323 Biogeochemical Cycles*, 13(1), 31-46, 1999.
- 1324 Walter, K., Don, A., Fuß, R., Kern, J., Drewer, J., and Flessa, H.: Direct nitrous oxide emissions from  
 1325 oilseed rape cropping—a meta-analysis, *Gcb Bioenergy*, 7(6), 1260-1271, 2015.
- 1326 Wang, Q., Zhou, F., Shang, Z., Ciais, P., Winiwarter, W., Jackson, R. B., Tubiello, F. N., Janssens-  
 1327 Maenhout, G., Tian, H., and Cui, X.: Data-driven estimates of global nitrous oxide emissions from  
 1328 croplands, *National Science Review*, 7(2), 441–452, 2020.



- 1329 Wanninkhof, R.: Relationship between wind speed and gas exchange over the ocean, *Journal of*  
1330 *Geophysical Research: Oceans*, 97(C5), 7373-7382, 1992.
- 1331 Wanninkhof, R.: Relationship between wind speed and gas exchange over the ocean revisited, *Limnology*  
1332 *Oceanography: Methods*, 12(6), 351-362, 2014.
- 1333 Weiss, R. F., and Price, B. A.: Nitrous oxide solubility in water and seawater, *Marine Chemistry*, 8(4), 347-  
1334 359, 1980.
- 1335 Wells, K. C., Millet, D. B., Bousserez, N., Henze, D. K., Chaliyakunnel, S., Griffis, T. J., Luan, Y.,  
1336 Dlugokencky, E. J., Prinn, R. G., and O'Doherty, S.: Simulation of atmospheric N<sub>2</sub>O with GEOS-Chem  
1337 and its adjoint: evaluation of observational constraints, *Geoscientific Model Development*, 8(10), 3179-  
1338 3198, 2015.
- 1339 Wilson, C., Chipperfield, M. P., Gloor, M., and Chevallier, F.: Development of a variational flux inversion  
1340 system (INVICAT v1. 0) using the TOMCAT chemical transport model, *Geoscientific Model Development*,  
1341 7(5), 2485-2500, 2014.
- 1342 Wollheim, W. M., Vörösmarty, C. J., Bouwman, A. F., Green, P., Harrison, J., Linder, E., Peterson, B. J.,  
1343 Seitzinger, S. P., and Syvitski, J. P. M.: Global N removal by freshwater aquatic systems using a spatially  
1344 distributed, within-basin approach, *Global Biogeochemical Cycles*, 22(2), 2008.
- 1345 Xu-Ri, and Prentice, I. C.: Terrestrial nitrogen cycle simulation with a dynamic global vegetation model,  
1346 *Global Change Biology*, 14(8), 1745-1764, 2008.
- 1347 Xu, R., Tian, H., Lu, C., Pan, S., Chen, J., Yang, J., and Zhang, B.: Preindustrial nitrous oxide emissions  
1348 from the land biosphere estimated by using a global biogeochemistry model, *Climate of the Past*, 13(7),  
1349 977-990, 2017.
- 1350 Xu, X., Sharma, P., Shu, S., Lin, T.-S., Ciais, P., Tubiello, F. N., Smith, P., Campbell, N., and Jain, A. K.:  
1351 Global greenhouse gas emissions from animal-based foods are twice those of plant-based foods, *Nature*  
1352 *Food*, 2(9), 724-732, 2021.
- 1353 Xu, X., Tian, H., Liu, M., Ren, W., Chen, G., Lu, C., and Zhang, C.: Multiple-factor controls on terrestrial  
1354 N<sub>2</sub>O flux over North America from 1979 through 2010, *Biogeosciences Discussions*, 8(6), 2011.
- 1355 Yang, H., Zhou, F., Piao, S., Huang, M., Chen, A., Ciais, P., Li, Y., Lian, X., Peng, S., and Zeng, Z.:  
1356 Regional patterns of future runoff changes from Earth system models constrained by observation,  
1357 *Geophysical Research Letters*, 44(11), 5540-5549, 2017.
- 1358 Yang, Q., Tian, H., Friedrichs, M. A. M., Hopkinson, C. S., Lu, C., and Najjar, R. G.: Increased nitrogen  
1359 export from eastern North America to the Atlantic Ocean due to climatic and anthropogenic changes during  
1360 1901–2008, *Journal of Geophysical Research: Biogeosciences*, 120(6), 1046-1068, 2015.
- 1361 Yang, S., Chang, B. X., Warner, M. J., Weber, T. S., Bourbonnais, A. M., Santoro, A. E., Kock, A.,  
1362 Sonnerup, R. E., Bullister, J. L., and Wilson, S. T.: Global reconstruction reduces the uncertainty of oceanic  
1363 nitrous oxide emissions and reveals a vigorous seasonal cycle, *Proceedings of the National Academy of*  
1364 *Sciences*, 117(22), 11954-11960, 2020.
- 1365 Yang, X., Wittig, V., Jain, A. K., and Post, W.: Integration of nitrogen cycle dynamics into the Integrated  
1366 Science Assessment Model for the study of terrestrial ecosystem responses to global change, *Global*  
1367 *Biogeochemical Cycles*, 23(4), 2009.
- 1368 Yao, Y., Tian, H., Shi, H., Pan, S., Xu, R., Pan, N., and Canadell, J. G.: Increased global nitrous oxide  
1369 emissions from streams and rivers in the Anthropocene, *Nature Climate Change*, 10(2), 138-142, 2020.
- 1370 Yao, Y., Tian, H., Xu, X., Li, Y., and Pan, S.: Dynamics and controls of inland water CH<sub>4</sub> emissions  
1371 across the Conterminous United States: 1860-2019, *Water Research*, 224, 119043, 2022.

- 1372 Yool, A., Martin, A. P., Fernández, C., and Clark, D. R.: The significance of nitrification for oceanic new  
1373 production, *Nature*, 447(7147), 999-1002, 2007.
- 1374 Zaehle, S., Ciais, P., Friend, A. D., and Prieur, V.: Carbon benefits of anthropogenic reactive nitrogen  
1375 offset by nitrous oxide emissions, *Nature Geoscience*, 4(9), 601-605, 2011.
- 1376 Zaehle, S., and Friend, A. D.: Carbon and nitrogen cycle dynamics in the O-CN land surface model: 1.  
1377 Model description, site-scale evaluation, and sensitivity to parameter estimates, *Global Biogeochemical*  
1378 *Cycles*, 24(1), 2010.
- 1379 Zamora, L. M., and Oschlies, A.: Surface nitrification: A major uncertainty in marine N<sub>2</sub>O emissions,  
1380 *Geophysical Research Letters*, 41(12), 4247-4253, 2014.
- 1381 Zhang, Y., Li, C., Zhou, X., and Moore III, B.: A simulation model linking crop growth and soil  
1382 biogeochemistry for sustainable agriculture, *Ecological Modelling*, 151(1), 75-108, 2002.
- 1383 Zhou, F., Shang, Z., Zeng, Z., Piao, S., Ciais, P., Raymond, P. A., Wang, X., Wang, R., Chen, M., and  
1384 Yang, C.: New model for capturing the variations of fertilizer-induced emission factors of N<sub>2</sub>O, *Global*  
1385 *Biogeochemical Cycles*, 29(6), 885-897, 2015.
- 1386 Zhou, J. B., Jiang, M. M., and Chen, G. Q.: Estimation of methane and nitrous oxide emission from  
1387 livestock and poultry in China during 1949–2003, *Energy Policy*, 35(7), 3759-3767, 2007.
- 1388 Zhu, Q., Riley, W. J., Tang, J., and Koven, C. D. : Multiple soil nutrient competition between plants,  
1389 microbes, and mineral surfaces: model development, parameterization, and example applications in  
1390 several tropical forests, *Biogeosciences*, 13(1), 341-363, 2016.
