# Supplementary material for: Global Nitrous Oxide Budget 1980–2020
Source: Copernicus journal article supplement (doi:10.5194/essd-2023-401), 2023-10-09
Supplement: Supplementary file 2 [file essd-2023-401-supplement.pdf]

- 1 *Supplementary Information of*
- 2 **Global Nitrous Oxide Budget 1980-2020**
- 3 **Hanqin Tian et al.**
- 4 *Correspondence to:* Hanqin Tian ([hanqin.tian@bc.edu](mailto:hanqin.tian@bc.edu))

## 5 Extended methodology

### 7 SI-1 NMIP-2: global Nitrogen/N<sub>2</sub>O Model Inter-comparison Project phase 2

8  
9 The NMIP2 is a follow-up model intercomparison project of NMIP (Tian et al., 2018), which  
10 provides estimates of N<sub>2</sub>O emissions from natural and agricultural soils and covers the time period  
11 1850-2020. Eight process-based Terrestrial Biosphere Models (TBMs) participate in NMIP-2. In  
12 general, N<sub>2</sub>O emissions from soil are regulated at two levels, which are the rates of nitrification  
13 and denitrification in the soil and soil physical factors regulating the ratio of N<sub>2</sub>O to other nitrous  
14 gases (Davidson et al., 2000). For N input to land ecosystems, all eight models considered N  
15 fertilizer use, atmospheric N deposition and biological fixation, but six models considered manure  
16 as N input. For vegetation processes, all models included dynamic algorithms in simulating N  
17 allocation to different living tissues and vegetation N turnover, and simulated plant N uptake using  
18 the “Demand and Supply-driven” approach. For soil N processes, all eight models simulated N  
19 leaching according to water runoff rate; however, models are different in representing nitrification  
20 and denitrification processes and the impacts of soil chemical and physical factors. The differences  
21 in simulating nitrification and denitrification processes are one of the major uncertainties in  
22 estimating N<sub>2</sub>O emissions. Model characteristics in simulating major N cycling processes  
23 associated with N<sub>2</sub>O emissions in each participating model are briefly described in Table SI-1.  
24

25 **Table SI-1. Model characteristics in simulating major N cycling processes**

|                                         | CLASSIC                       | DLEM                           | ELM                          | ISAM                          | LPX-Bern                     | O-CN                             | ORCHIDEE                              | VISIT                    |
|-----------------------------------------|-------------------------------|--------------------------------|------------------------------|-------------------------------|------------------------------|----------------------------------|---------------------------------------|--------------------------|
| Open C cycle <sup>a</sup>               | Yes                           | Yes                            | Yes                          | Yes                           | Yes                          | Yes                              | Yes                                   | Yes                      |
| C-N coupling                            | Yes                           | Yes                            | Yes                          | Yes                           | Yes                          | Yes                              | Yes                                   | Yes                      |
| N pools <sup>b</sup>                    | (3, 1, 3)                     | (6,6,8)                        | (6,4,5)                      | (6,4,4)                       | (4,3,8)                      | (9,6,9)                          | (9,6,9)                               | (4,1,4)                  |
| Demand and supply-driven plant N uptake | Yes                           | Yes                            | Yes                          | Yes                           | Yes                          | Yes                              | Yes                                   | Yes                      |
| N allocation <sup>c</sup>               | Dynamic                       | Dynamic                        | Dynamic                      | Dynamic                       | Dynamic                      | Dynamic                          | Dynamic                               | Dynamic                  |
| Nitrification                           | $f(T, SWC, C_{nos})$          | $f(T, SWC, C_{nos})$           | $f(T, SWC, pH, rh, C_{nos})$ | $f(T, SWC, C_{nos})$          | $f(T, SWC, C_{nos})$         | $f(T, SWC, pH, C_{nos})$         | $f(T, SWC, pH, C_{nos})$              | $f(T, SWC, pH, C_{nos})$ |
| Denitrification                         | $f(T, SWC, C_{nos})$          | $f(T, SWC, clay, rh, C_{nos})$ | $f(T, SWC, pH, rh, C_{nos})$ | $f(T, SWC, C_{nos})$          | $f(T, SWC, R_{no}, C_{nos})$ | $f(T, SWC, pH, R_{no}, C_{nos})$ | $f(T, SWC, pH, denitrifier, C_{nos})$ | $f(SWC, rh, C_{nos})$    |
| Mineralization, immobilization          | $f(C:N)$                      | $f(C:N)$                       | $f(C:N)$                     | $f(C:N)$                      | $f(C:N)$                     | $f(C:N)$                         | $f(C:N)$                              | $f(C:N)$                 |
| N leaching                              | $f(runoff, C_{nos}, C_{nhi})$ | $f(runoff, C_{nos}, C_{nhi})$  | $f(runoff, C_{nos})$         | $f(runoff, C_{nos}, C_{nhi})$ | $f(runoff, C_{nos})$         | $f(runoff, C_{nos}, C_{nhi})$    | $f(runoff, C_{nos}, C_{nhi})$         | $f(runoff, C_{nos})$     |
| NH <sub>3</sub> volatilization          | $f(C_{nos})$                  | $f(T, SWC, pH, C_{nos})$       | No                           | $f(C_{nos})$                  | $f(T, SWC, pH, C_{nos})$     | $f(C_{nos})$                     | $f(SWC, pH, C_{nos})$                 | $f(T, SWC, pH, C_{nos})$ |
| Plant N turnover <sup>d</sup>           | Dynamic                       | Dynamic                        | Dynamic                      | Dynamic                       | Dynamic                      | Dynamic                          | Dynamic                               | Dynamic                  |
| N resorption                            | Fixed                         | $f(C:N)$                       | Fixed                        | $f(C:N)$                      | Fixed                        | Fixed                            | Fixed                                 | Fixed                    |
| N fixation                              | $f(N_{fix})$                  | $f(T, SWC, C_{nos}, C_{nos})$  | $f(T, C:N)$                  | $f(ET)$                       | Implied by mass balance      | $f(N_{fix})$                     | Fixed                                 | $f(ET)$                  |
| N fertilizer use                        | Yes                           | Yes                            | Yes                          | Yes                           | Yes                          | Yes                              | Yes                                   | Yes                      |
| Manure N use                            | No                            | Yes                            | No                           | Yes                           | No                           | Yes                              | Yes                                   | Yes                      |
| N deposition                            | Yes                           | Yes                            | Yes                          | Yes                           | Yes                          | Yes                              | Yes                                   | Yes                      |

26 <sup>a</sup> “Open” denotes that excess N can be leached from the system.

27 <sup>b</sup> Numbers of N pools (vegetation pools, litter pools, soil pools).

28 <sup>c</sup> Dynamic denotes time-varied N allocation ratio to different N pools.

29 *T*: soil temperature, *SWC*: soil water content, *clay*: soil clay fraction, *ET*: evapotranspiration, *denitrifier*:  
30 soil denitrifier biomass, *rh*: soil heterogeneous respiration, *Nlimit*: N limitation of vegetation growth,  
31 *C<sub>NO3</sub>*: soil  $\text{NO}_3^-$  content, *C<sub>NH4</sub>*: soil  $\text{NH}_4^+$  content.

32  
33 All NMIP2 models are driven by consistent input datasets (i.e., climate, atmospheric  $\text{CO}_2$   
34 concentration, land cover change, irrigation, atmospheric N deposition, mineral N fertilization, and  
35 manure N application and deposition) and implemented consistent simulation experiments (SH0 –  
36 SH12; Table A4). Nitrogen inputs data used in NMIP2 simulations are from History of  
37 anthropogenic Nitrogen inputs (HaNi) dataset (*Tian et al.*, 2022), which takes advantage of  
38 different data sources in a spatiotemporally consistent way to generate a set of high-resolution (5  
39 arcminutes) gridded N input products from 1850 to 2020. HaNi data set shows that the total  
40 anthropogenic N inputs to global terrestrial ecosystems increased from 29.05  $\text{Tg N yr}^{-1}$  in the 1860s  
41 to 267.23  $\text{Tg N yr}^{-1}$  in the 2010s, with the dominant N source changing from atmospheric N  
42 deposition (before the 1900s) to manure N (the 1910s-2000s), and to synthetic fertilizer in the  
43 2010s (Fig. B3). The climate data used to run historical simulations is the half degree CRU-JRA2.2  
44 6-hourly forcing over 1901-2020  
45 (<https://catalogue.ceda.ac.uk/uuid/4bdf41fc10af4caaa489b14745c665a6>). Annual  $\text{CO}_2$   
46 concentration during 1850-2020 were derived from ice core  $\text{CO}_2$  data and NOAA annual  
47 observations(<https://www.esrl.noaa.gov>). Historical distribution of cropland, pasture, rangeland  
48 and irrigation during 1850-2020 were from Land-Use Harmonization 2 (LUH2) dataset (*Hurt et al.*,  
49 2020). The original dataset of LUH2 is at a resolution of  $0.25^\circ \times 0.25^\circ$  longitude/latitude. We  
50 aggregated all geo-referenced input data into a consistent spatial resolution of  $0.5^\circ \times 0.5^\circ$   
51 longitude/latitude to run NMIP2 models.

52  
53 NMIP2 models perform a subset of 13 simulations (SH0-SH12) to quantify  $\text{N}_2\text{O}$  emissions from  
54 both agricultural and natural soils during the study period, and to disentangle the effects of multiple  
55 environmental factors on soil  $\text{N}_2\text{O}$  emissions. The SH1 results were taken as the “best estimates”  
56 of soil  $\text{N}_2\text{O}$  emissions because they include the effects of all driving factors that models can take  
57 into account. In the SH0 simulation, driving forces were kept constant at the level in 1850 over the  
58 entire simulation period (1850-2020). According to previous  $\text{N}_2\text{O}$  budget studies, atmospheric  $\text{N}_2\text{O}$   
59 growth rate and Monte-Carlo method, we suggest the following criteria for the  $\text{N}_2\text{O}$  budget  
60 inclusion (Table A6), and the criteria for carbon components are consistent with TRENDY. By  
61 comparing results from factorial simulation experiments (SH0 - SH12), we attribute changes in  
62 soil  $\text{N}_2\text{O}$  emissions to seven natural and anthropogenic factors, namely, climate (CLIM, including  
63 precipitation, humidity, temperature and photosynthetic active radiation changes), atmospheric  
64  $\text{CO}_2$  concentration ( $\text{CO}_2$ ), land cover change (LCC), irrigation (IRRI), atmospheric N deposition  
65 (NDEP), mineral N fertilizer use (NFER), and manure N use in cropland (MANN). In order to  
66 understand soil  $\text{N}_2\text{O}$  emissions dynamics caused by crop cultivation, we further separate the global  
67 and regional  $\text{N}_2\text{O}$  emissions into those derived from cropland soils and those from soils of other  
68 land ecosystems. In this study, we attribute the impact of a single factor on cropland  $\text{N}_2\text{O}$   
69 emissions. Five models (DLEM, ISAM, O-CN, ORCHIDEE, and VISIT) considered the effects  
70 of manure N application in cropland, therefore, we use these five models’ results to calculate the  
71 manure N effect (SH1-SH2). Meanwhile, we used results from all the eight models (i.e.,  
72 CLASSIC, DLEM, ELM, ISAM, LPX-Bern, O-CN, ORCHIDEE, and VISIT) to calculate the  
73 effects of synthetic N fertilizer use (SH1-SH3) and atmospheric N deposition (SH1-SH4). The  
74 effect of N deposition in natural ecosystems (SH1-SH4) and the effects of  $\text{CO}_2$  (SH1-SH7) and

75 climate (SH1-SH8) on global terrestrial ecosystems are calculated from the eight NMIP2 models  
 76 mentioned above.

77  
 78  
 79

**Table SI-2. Criteria for the N<sub>2</sub>O budget inclusion**

| Carbon criteria                                                                                                                                                                                                                              | N <sub>2</sub> O criteria                                                                                                                                                                                                                                                                                                                                                                                                                                                                                                                                                                                                                     |
|----------------------------------------------------------------------------------------------------------------------------------------------------------------------------------------------------------------------------------------------|-----------------------------------------------------------------------------------------------------------------------------------------------------------------------------------------------------------------------------------------------------------------------------------------------------------------------------------------------------------------------------------------------------------------------------------------------------------------------------------------------------------------------------------------------------------------------------------------------------------------------------------------------|
| (1) Steady state after spin-up, diagnosed from SH0 run: steady-state defined as an offset < 0.10 PgC yr <sup>-1</sup> , drift < 0.05 PgC yr <sup>-1</sup> per century (i.e. first is the average over 1850-2020, second is the slope x 100). | (1) Steady state after spin-up, diagnosed from SH0 run: drift < 0.2 Tg N <sub>2</sub> O-N yr <sup>-1</sup> per century (i.e. the slope x 100).                                                                                                                                                                                                                                                                                                                                                                                                                                                                                                |
| (2) Net annual land flux is a carbon sink over the 1990s and 2000s as constrained by global atmospheric and oceanic observations (Keeling & Manning, 2014), diagnosed from SH3 run.                                                          | (2) Inside the present-day (2007-2016) land emission range: 7-13 Tg N <sub>2</sub> O-N yr <sup>-1</sup> , diagnosed from SH1 run. The upper limit was calculated using the maximum total N <sub>2</sub> O emissions minus the minimum estimates of other sources, and the lower limit was calculated using the minimum total N <sub>2</sub> O emissions minus the maximum estimates of other sources. The range of total emissions was estimated by a one-box model using atmospheric N <sub>2</sub> O growth rate, and the range of the sum of other sources was calculated by a Monte-Carlo method using estimates from Tian et al. (2020). |
|                                                                                                                                                                                                                                              | (3) Inside the pre-industrial land emission range: 3 to 9 Tg N <sub>2</sub> O-N yr <sup>-1</sup> , diagnosed from SH1 run. This range is derived from the pre-industrial atmospheric burden/N <sub>2</sub> O lifetime minus ocean and river/ coastal/estuary emissions (Michael J. Prather et al., 2015).                                                                                                                                                                                                                                                                                                                                     |

80  
 81

**Brief description of algorithms associated with N<sub>2</sub>O flux in each NMIP2 model:**

**83 1: CLASSIC**

84 The representation of nitrogen cycling in CLASSIC is described in *Asaadi and Arora (2021)* and  
 85 *Kou Giesbrecht and Arora (2022)*. N<sub>2</sub>O production due to both nitrification and denitrification are  
 86 represented. N<sub>2</sub>O loss during nitrification ( $\lambda_{\text{N}_2\text{O}}$ ; g N m<sup>-2</sup> d<sup>-1</sup>) is represented with the following equation:

87  
 88  $\lambda_{\text{N}_2\text{O}}$  is a coefficient (d<sup>-1</sup>),  $\alpha$  is a dimensionless scalar that depends on soil temperature averaged over the  
 89 top 0.5m soil depth,  $\beta$  is a dimensionless scalar that depends on soil matric potential, and  $N_{\text{NH}_4}$  is the soil  
 90 ammonium pool (g N m<sup>-2</sup>).

91  
 92 N<sub>2</sub>O loss during denitrification ( $\lambda_{\text{N}_2\text{O}}$ ; g N m<sup>-2</sup> d<sup>-1</sup>) is represented with the following equation:  
 93

94 is a coefficient ( $d^{-1}$ ), is a dimensionless scalar that depends on soil temperature averaged over the  
 95 top 0.5m soil depth, is a dimensionless scalar that depends on soil moisture ( $\theta$ ), and is the soil  
 96 nitrate pool ( $g\ N\ m^{-2}$ ).

97

## 98 **2: DLEM**

99 The nitrogen cycle scheme in DLEM2.0 (Xu et al., 2017; Yang et al., 2015) are similar as  
 100 DLEM1.0 (Lu and Tian, 2013; Tian et al., 2012b; Tian et al., 2010; Tian et al., 2011; Xu et al.,  
 101 2011), However, the  $N_2O$  emission schemes in DLEM2.0 (Xu et al., 2017) have been modified  
 102 based on Chatskikh et al. (2005) and Heinen (2006).

103

$$104\ R_{nit} = k_{nit\_max}f(T1)f(WFPS)C_{NH4} \quad (1)$$

105

$$106\ R_{den} = k_{den\_max}f(T2)f(WFPS)C_{NO3} \quad (2)$$

107

108 where  $R_{nit}$  is the daily nitrification rate ( $g\ N/m^2/d$ );  $R_{den}$  is the daily denitrification rate ( $g$   
 109  $N/m^2/d$ );  $f(T1)$  and  $f(T2)$  are the impact function of daily soil temperature on nitrification and  
 110 denitrification, respectively;  $f(WFPS)$  is the impact function of water-filled pore space (WFPS)  
 111 on nitrification, denitrification and  $N_2O$  diffusion;  $k_{nit\_max}$  is the maximum fraction of  $NH_4^+-N$   
 112 that is converted to  $NO_3^- -N$  or gases (0-1);  $k_{den\_max}$  is the maximum fraction of  $NO_3^- -N$  that is  
 113 converted to gases (0-1);  $C_{NH4}$  and  $C_{NO3}$  are the soil  $NH_4^+-N$  and  $NO_3^- -N$  content ( $g\ N/m^2$ ).  $N_2O$   
 114 from denitrification and nitrification processes are calculated as,

115

$$116\ R_{N2O} = (R_{nit} + R_{den})f(T3)(1 - f(WFPS)) \quad (3)$$

117

118 where  $R_{N2O}$  is the daily  $N_2O$  emission rate ( $g\ N/m^2/d$ );  $f(T3)$  is the impact function of daily soil  
 119 temperature on  $N_2O$  diffusion rate from soil pores. The calculation methods for these functions  
 120 and parameters were described in detail in Xu et al. (2017) and Yang et al. (2015).

121

## 122 **3: ELM**

123 The nitrogen dynamics in ELM is simulated based on the theory of equilibrium chemistry  
 124 approximation (Zhu et al., 2016). Plants, soil microbes, and abiotic factors such as mineral surfaces  
 125 coexist in the same soil environment and vie for a diverse array of nutrients, including  $NH_4^+$ ,  
 126  $NO_3^-$ . Due to the limited availability of these nutrients, intense competitive interactions are  
 127 expected. When the potential nutrient demands (from all nutrient consumers) exceed the supply at  
 128 a given time step, the allocation of limited nutrients among the consumers affects their  
 129 performance (e.g., plant growth, soil organic matter accumulation, nitrification, denitrification  
 130 rates). ELM adopts a multiple-consumer-multiple-substrate competition network (Zhu et al., 2015;  
 131 Zhu et al., 2019) to simulate (1) nitrogen uptake facilitated by nitrogen carrier enzymes, (2) binding  
 132 of a nutrient substrate to a particular enzyme precludes it from attaching to other enzymes, and (3)  
 133 rates and affinities of consumers for different substrates. After the nutrient competition has been  
 134 resolved, scaling terms ( $f(ECA_{nit})$  and  $f(ECA_{den})$ ) will be applied to the potential nitrification  
 135 and denitrification processes:

136

$$137\ R_{nit} = k_{nit\_max}f(\theta)f(T)(1 - f(O))f(ECA_{nit})C_{NH4} \quad (4)$$

138

$$R_{den} = \min(f(deomp), f(C_{NO_3}))f(ECA_{den}) \quad (5)$$

where  $k_{nit\_max}$  is the maximum nitrification rate,  $f(\theta)$ ,  $f(T)$ ,  $f(O)$  are soil moisture, temperature, and oxygen scalars, respectively.  $f(deomp)$  and  $f(C_{NO_3})$  are carbon limited and  $NO_3^-$ - limited denitrification rates (Del Grosso et al., 2000).

144  
145

#### 4: ISAM

ISAM model contains detailed calculations of the terrestrial ecosystem's organic and mineral N cycle (Yang et al., 2009). The major N processes in ISAM include biological fixation, leaching, mineralization and immobilization, plant uptake, nitrification, and denitrification. The soil biogeochemistry module of ISAM shares the same ten soil layers (to 3.5 m depth) as the soil biogeophysics and calculates the vertical transport of SOC and N (Shu et al., 2020; Yang et al., 2009).  $N_2O$  emission in ISAM  $N_2O$  is produced as a byproduct of nitrification and denitrification (Xu et al., 2021).  $N_2O$  module explicitly accounts for the vertical transport of C, N, and  $O_2$  within every soil layer for both saturated and unsaturated soil conditions by accounting for the process of oxygen diffusing into the soil from the atmosphere and the soil oxygen supply. The model also explicitly accounts for the effects of anoxic and oxic environments on nitrification ( $N_{ni}$ , Eq. 6) and denitrification ( $N_{de}$ , Eq. 7). Both environments are calculated based on the fraction of anoxic soil depending on soil  $O_2$  concentration, which is non-linearly correlated with the chemical pathways forming  $N_2O$ .

159

$$N_{ni} = NH_4^+ \times (1 - e^{-F_{te\_m} \times F_{sm\_m} \times r_{ni}}) \times F_{pH\_m\_ni} \times R_d \quad (6)$$

161

$$N_{de} = NO_3^- \times r_{de} \times Rh \times F_{pH\_m\_de} \times R_d \quad (7)$$

163

where  $NH_4^+$  and  $NO_3^-$  are ammonium and nitrate pool sizes;  $F_{te\_m}$  is temperature modifier;  $F_{sm\_m}$  is soil moisture modifier;  $r_{ni}$  and  $r_{de}$  are base nitrification and denitrification rates;  $F_{pH\_m\_ni}$  and  $F_{pH\_m\_de}$  are pH modifiers for nitrification and denitrification;  $R_d$  is relative soil anoxic fraction;  $Rh (= 1 - R_d)$  is heterotrophic respiration.

168

Under anoxic soil conditions,  $N_2O$  is produced through denitrification, while under oxic soil conditions, more  $N_2O$  is produced from nitrification. The model accounts for soil  $NH_4^+$  volatilization at the soil surface when  $NH_4^+$  in  $NH_4^+$ -containing fertilizers (e.g., urea) is converted to ammonia gas, depending upon pH (Huang and Gerber, 2015). The soil  $NH_4^+$  volatilization in the model is also affected by the anoxic condition, which increases under a higher temperature and relatively lesser soil anoxic condition. The model accounts for the impacts of pH on nitrification, denitrification, and volatilization rates (Li et al., 2000; Xu-Ri and Prentice, 2008). We prescribe the soil pH from the Global Soil Dataset for Earth System Modeling dataset (GSDE) (Shangguan et al., 2014).

177

178

#### 5: LPX-Bern

The implementation of nitrogen dynamics in LPX-Bern is based on the work of Xu-Ri and Prentice (2008). Nitrogen uptake by plants is governed by their demand and the availability of nitrogen in two soil pools representing ammonium and nitrate. Nitrogen from deposition and fertilization are added to these inorganic soil pools. Losses include ammonium volatilization, nitrate leaching as

183

184 well as N<sub>2</sub>O and NO production during nitrification and N<sub>2</sub>O, NO and N<sub>2</sub> production during  
 185 denitrification. Aerobic nitrification of ammonium is dependent on soil temperature ( $T_{soil}$ ) and  
 186 indirectly on soil water content due to the partitioning of wet and dry soil:

$$187$$

$$188 \quad R_{nit} = max_{nit} f_1(T_{soil}) C_{NH_4, dry} \quad (8)$$

189 where  $max_{nit} = 0.92 \text{ day}^{-1}$  is the daily maximum nitrification rate at 20°C.  
 190 Anaerobic denitrification of nitrate in wet soil depends on labile carbon availability and soil  
 191 temperature:  
 192

$$193$$

$$194 \quad R_{den} = R_{mb} / (R_{mb} + K_{mb}) f_2(T_{soil}) C_{NO_3, wet} / (C_{NO_3, wet} + K_n) \quad (9)$$

195 The parameters  $K_{mb}$  and  $K_n$  are taken from *Xu-Ri and Prentice* (2008) and  $R_{mb}$  is the  
 196 microbiological soil respiration. The amount of nitrogen lost as N<sub>2</sub>O due to nitrification and  
 197 denitrification is modelled as a function of soil temperature, water content and the respective  
 198 process rate.  
 199

200

## 201 **6: O-CN**

202 The treatment of inorganic soil nitrogen dynamics in O-CN follows largely *Xu-Ri and Prentice*  
 203 (2008). O-CN (*Zaehle and Friend, 2010*) considers N losses to NH<sub>3</sub> volatilisation, NO<sub>x</sub>, N<sub>2</sub>O and  
 204 N<sub>2</sub> production and emission, as well as NH<sub>4</sub> and NO<sub>3</sub> leaching. Inorganic nitrogen dynamics in the  
 205 soil are tightly coupled to plant uptake and net mineralization. The anaerobic volume fraction of  
 206 the soil is estimated by an empirical function of the fractional soil moisture content (*Zaehle et al.,*  
 207 *2011*). The fraction of ammonium in the aerobic part of the soil is subject to nitrification, according  
 208 to:

$$209$$

$$210 \quad R_{nit} = v_{max_{nit}} f(T1) f(pH1) C_{NH_4} \quad (10)$$

211 where  $f(pH1)$  is the soil pH response functions for nitrification (*Li et al., 1992; Xu-Ri and Prentice,*  
 212 *2008*), and  $v_{max_{nit}}$  is the maximum daily nitrification rate under 20°C and favourable pH  
 213 conditions (*Xu-Ri and Prentice, 2008*).  
 214

215

216 Gross denitrification of the fraction of nitrate under anoxic conditions is modelled as:

$$217$$

$$218 \quad R_{den} = R_{mb} / (R_{mb} + K_{mb}) f(T2) f(pH2) C_{NO_3} / (C_{NO_3} + K_n) \quad (11)$$

219 where  $f(pH2)$  is the soil pH response functions for denitrification (*Li et al., 1992; Xu-Ri and*  
 220 *Prentice, 2008*),  $R_{mb}$  is the soil microbial respiration rate, and  $K_{mb}$  and  $K_n$  parameters taken from  
 221 *Li et al. (1992)*.  
 222

223

224 The N<sub>2</sub>O production from nitrification and denitrification is then calculated as:

$$225$$

$$226 \quad R_{N_2O} = a_{nit} f(T1) R_{nit} + b_{den} f(T2) f(pH3) R_{den} \quad (12)$$

227

228 where  $a_{nit}$  and  $b_{denit}$  are fraction loss constants,  $f(pH3)$  is a pH-modifier changing the degree of  
 229 denitrification producing  $N_2O$  versus  $NO_x$  or  $N_2$  (Zaehle *et al.*, 2011). Emissions of volatile  
 230 compounds are simulated using the empirical emission of Xu-Ri and Prentice (2008).

231

## 232 7: ORCHIDEE

233 Modeling of the mineral N dynamics by the ORCHIDEE model originates from the formulations  
 234 used in the O-CN (Zaehle and Friend, 2010). It is composed of five pools for  
 235 ammonium/ammoniac, nitrate,  $NO_x$ , nitrous oxide, and di-nitrogen forms.  $N_2O$  production in both  
 236 nitrification and denitrification processes are represented.

237

238 The potential daily rate of nitrification,  $R_{nit}$ , occurs only on the aerobic fraction of the soil and is  
 239 a function of temperature, pH, and ammonium concentration ( $C_{NH4}$ ):

240

$$241 R_{nit} = (1 - f(WFPS))f(T1)f(pH1)k_{nit}C_{NH4} \quad (13)$$

242

243 where  $k_{nit}$  is the reference potential  $NO_3^-$  production per mass unit of ammonium.

244

## 245 8: VISIT

246 The nitrogen cycle scheme of VISIT is composed of three organic soil nitrogen pools (microbe,  
 247 litter, and humus), two inorganic soil nitrogen pools (ammonium and nitrate), and vegetation pools.  
 248 Fertilizer is considered as an input to the ammonium and nitrate pools at a fixed ratio, and manure  
 249 as an input into the litter organic nitrogen pool.  $N_2O$  emissions through nitrification and  
 250 denitrification are estimated using the scheme developed by Parton *et al.* (1996). Nitrification-  
 251 associated  $N_2O$  emission ( $R_{nit,N2O}$ ) is evaluated as follows,

252

$$253 R_{nit,N2O} = f(WFPS)f(pH1)f(T1)(K_{max} + F_{max}f(NH4)) \quad (14)$$

254

255 where  $K_{max}$  is the soil-specific turnover coefficient;  $F_{max}$  is the parameter of maximum nitrification  
 256 gas flux; and  $f(NH_4)$  is the effect of soil ammonium on nitrification. Denitrification-associated  $N_2O$   
 257 emission ( $R_{den,N2O}$ ) is evaluated by the following equation:

258

$$259 R_{den,N2O} = R_{den}(1 + R_{N2/N2O}) \quad (15)$$

260

$$261 R_{den} = \min(f(NO_3), f(CO_2)) \times f(WFPS) \quad (16)$$

262

263 where  $R_{N2/N2O}$  is the fractionation coefficient, which is also a function of WFPS, soil nitrate, and  
 264 heterotrophic respiration,  $f(NO_3)$  is the maximum denitrification rate in high soil respiration rate  
 265 condition,  $f(CO_2)$  is the maximum denitrification rate in high  $NO_3^-$  levels, and  $f(WFPS)$  is the  
 266 effect of WFPS on denitrification rate.

267

268  $N_2O$  production by nitrification ( $R_{N2O,nit}$ , g N- $N_2O/m^2/d$ ) is expressed as a function of the potential  
 269 daily rate of nitrification ( $R_{nit}$ , g N- $NO_3^-/m^2/d$ ), temperature and the water content as shown in  
 270 Zhang *et al.* (2002).

271

$$272 R_{N2O,nit} = f(WFPS)f(T1)R_{nit}p_{N2O,nit} \quad (17)$$



273  
 274 where  $p_{N_2O,mit}$  (g N-N<sub>2</sub>O (g N-NO<sub>3</sub><sup>-</sup>)<sup>-1</sup>) is the reference N<sub>2</sub>O production per mass unit of NO<sub>3</sub><sup>-</sup>  
 275 produced by nitrification. The denitrification occurs on the anaerobic fraction of the soil which is  
 276 computed as a function of the water-filled porosity ( $f(WFPS)$ ) and is controlled by temperature,  
 277 pH, soil NO concentration and denitrifier microbial activity ( $a_{microb}$ , g m<sup>-2</sup>) (Li *et al.*, 2000).

$$278$$

$$279 R_{N_2O,den} = f(WFPS)f(T_2)f(pH)f(NO)p_{N_2O,den}a_{microb} \quad (18)$$

280  
 281 where  $f(NO)$  is a Michaelis-Menten shape function and  $p_{N_2O,den}$  is the reference N<sub>2</sub>O production  
 282 per mass unit of denitrifier microbes.

## 283

### 284 **SI-2 The FAOSTAT inventory**

285 The FAOSTAT emissions data (FAO, 2022) are computed at Tier 1 following IPCC (2006), Vol.

286  
 287 4. The overall equation is as follows:

288 Direct emissions are estimated at the country level, using the formula:

$$289$$

$$290 \quad \quad \quad Emission = A * EF \quad (19)$$

291  
 292 where emission represents kg N yr<sup>-1</sup>;  $A$  represents the amount of N in the following items (annual  
 293 synthetic N applications/manure applied to soils/manure left on pasture/manure treated in manure  
 294 management systems/crop residue/biomass burned amount) in kg N yr<sup>-1</sup>;  $EF$  = Tier 1, default IPCC  
 295 emission factors, expressed in kg N/kg N.

296  
 297 Indirect emissions are estimated at the country level, using the formula:

$$298$$

$$299 \quad \quad \quad Emission = A_{v\&l} * EF \quad (20)$$

300  
 301 where emission represents kg N yr<sup>-1</sup>;  $A_{v\&l}$  represents the fraction of manure/synthetic N fertilizers  
 302 that volatilize as NH<sub>3</sub> and NO<sub>x</sub> and are lost through runoff and leaching in kg N yr<sup>-1</sup>;  $EF$  = Tier 1,  
 303 default IPCC emission factors, expressed in kg N/kg N.

304  
 305 Synthetic N fertilizers: N<sub>2</sub>O from synthetic fertilizers is produced by microbial processes of  
 306 nitrification and denitrification taking place on the addition site (direct emissions), and after  
 307 volatilization/redeposition and leaching processes (indirect emissions).

308  
 309 Manure management: The term manure includes both urine and dung (i.e., both liquid and solid  
 310 material) produced by livestock. N<sub>2</sub>O is produced directly by nitrification and denitrification  
 311 processes in the manure, and indirectly by nitrogen (N) volatilization and redeposition processes.  
 312 Manure applied to soils: N<sub>2</sub>O is produced by microbial processes of nitrification and denitrification  
 313 taking place on the application site (direct emissions), and after volatilization/redeposition and  
 314 leaching processes (indirect emissions).

315  
 316 Manure left on pastures: N<sub>2</sub>O is produced by microbial processes of nitrification and denitrification  
 317 taking place on the deposition site (direct emissions), and after volatilization/redeposition and  
 318 leaching processes (indirect emissions).

319  
320 Crop Residue: N<sub>2</sub>O emissions from crop residues consist of direct and indirect emissions from  
321 nitrogen (N) in crop residues left on agricultural fields by farmers and from forages during pasture  
322 renewal (following the definitions in the IPCC guidelines (*IPCC*, 2006)). Specifically, N<sub>2</sub>O is  
323 produced by microbial processes of nitrification and denitrification taking place on the deposition  
324 site (direct emissions), and leaching processes (indirect emissions).

325  
326 Cultivation of organic soils: The FAOSTAT domain “Cultivation of organic soils” contains  
327 estimates of direct N<sub>2</sub>O emissions associated with the drainage of organic soils – histosols – under  
328 cropland and grazed grassland.

329  
330 Burning-savanna: N<sub>2</sub>O emissions from the burning of vegetation biomass in the land cover types:  
331 Savanna, Woody Savanna, Open Shrublands, Closed Shrublands, and Grasslands. Burning-crop  
332 residues: N<sub>2</sub>O produced by the combustion of a percentage of crop residues burnt on-site. Burning-  
333 biomass: N<sub>2</sub>O emissions from the burning of vegetation biomass in the land cover types: Humid  
334 tropical forests, other forests, and organic soils.

335

### 336 **SI-3 The EDGAR v7.0 inventory**

337 The new online version, EDGAR v7.0 ([https://edgar.jrc.ec.europa.eu/dataset\\_ghg70](https://edgar.jrc.ec.europa.eu/dataset_ghg70)) incorporates  
338 a full differentiation of emission processes with technology-specific emission factors and  
339 additional end-of-pipe abatement measures and as such updates and refines the emission estimates.  
340 The emissions are modelled based on the latest scientific knowledge and available global statistics  
341 primarily from International Energy Agency (*IEA*, 2021) for energy related sectors, *FAO* statistics  
342 (*FAO*, 2022) for agriculture, which were complemented for the rest of sectors with United States  
343 Geological Survey (USGS), International Fertiliser Association (IFA), Gas Flaring Reduction  
344 Partnership (GGFR)/U.S. National Oceanic and Atmospheric Administration (NOAA) and World  
345 Steel Association (worldsteel) recent statistics; the methods are those recommended by *IPCC*  
346 (2006). Official data submitted by the Annex I countries to the United Nations Framework  
347 Convention on Climate Change (UNFCCC) and to the Kyoto Protocol are used to some extent,  
348 particularly regarding control measures implemented since 1990 that are not described by  
349 international statistics. A fast-Track approach was used to extend the N<sub>2</sub>O emission time series for  
350 the latest years up to 2021 (*Crippa et al.*, 2021; *Crippa et al.*, 2022).

351  
352 The N<sub>2</sub>O emission factors for direct soil emissions of N<sub>2</sub>O from the use of synthetic fertilizers,  
353 from manure used as fertilizers, and from crop residues are taken from *IPCC* (2006), which  
354 updated the default IPCC emission factor in the IPCC Good Practice Guidance (2000) with a 20%  
355 lower value. N<sub>2</sub>O emissions from the use of animal waste as fertilizer are estimated considering  
356 both the loss of N that occurs from manure management systems before manure is applied to soils  
357 and the additional N introduced by bedding material (*Janssens-Maenhout et al.*, 2019). N<sub>2</sub>O  
358 emissions from fertilizer use and CO<sub>2</sub> from urea fertilization are estimated based on IFA and *FAO*  
359 recent statistics.

360  
361 N<sub>2</sub>O emissions from manure management are based on the distribution of manure management  
362 systems from Annex I countries reporting to the UNFCCC, *Zhou et al.* (2007) for China and *IPCC*  
363 (2006) for the rest of the countries.

364

365 Different N<sub>2</sub>O emission factors are applied to tropical and non-tropical regions. N and dry matter  
366 content of agricultural residues are estimated from the cultivation area and yield for 24 crop types  
367 from *FAO* (2022) and using emission factors of *IPCC* (2006).

368  
369 Indirect N<sub>2</sub>O emissions from leaching and runoff of nitrate are estimated from N input to  
370 agricultural soils. Leaching and runoff are assumed to occur in all agricultural areas except non-  
371 irrigated dryland regions, which are identified with maps of *FAO Geonetwork*  
372 (<https://www.fao.org/land-water/databases-and-software/geonetwork/en/>). The fraction of N lost  
373 through leaching and runoff is based on the study of *Van Drecht et al.* (2003). The updated  
374 emission factor for indirect N<sub>2</sub>O emissions from N leaching and run-off from the *IPCC* (2006)  
375 guidelines is selected, while noting that it is 70% lower than the mean value of the 1996 *IPCC*  
376 Guidelines and the *IPCC Good Practice Guidance IPCC* (1996; 2000).

377  
378 Indirect N<sub>2</sub>O emissions from atmospheric deposition of N of NO<sub>x</sub> and NH<sub>3</sub> emissions from non-  
379 agricultural sources, mainly fossil fuel combustion, are estimated using N in NO<sub>x</sub> and NH<sub>3</sub>  
380 emissions from these sources as activity data, based on *EDGAR v7.0* database for these gases. The  
381 same emission factor from *IPCC* (2006) is used for indirect N<sub>2</sub>O from atmospheric deposition of  
382 N from NH<sub>3</sub> and NO<sub>x</sub> emissions, as for agricultural emissions (*Janssens-Maenhout et al.*, 2019).

383  
384 The uncertainties for *EDGAR* N<sub>2</sub>O emissions estimated by *Solazzo et al.* (2021) are based  
385 primarily on the uncertainties in emissions factors and activity data statistics from the *IPCC*  
386 (2006). Globally, these emissions are accurate within an interval of ±113 for energy, -12% to  
387 +16% for industrial processes and product use, -225 to +302 for agriculture, -159% to 203% for  
388 waste and ±112% for others; the most uncertain emissions are those related to N<sub>2</sub>O from waste  
389 and agriculture.

390

#### 391 **SI-4 The UNFCCC inventory (need description of UNFCCC)**

392 The UNFCCC collects detailed data on GHG emissions from its parties. Following extensive  
393 guidance developed by *IPCC* (*Buendia et al.*, 2019; *Eggleston et al.*, 2006), parties to the  
394 convention prepare national GHG inventories, including emissions (and sinks) of N<sub>2</sub>O. All  
395 anthropogenic activities are covered, in agriculture both direct and indirect N<sub>2</sub>O emissions are  
396 included. While *IPCC* basically provides emission factor approaches, parties are encouraged to  
397 take account of national specificities, use national factors and data, wherever available, or develop  
398 emission models, with adequate scientific proof provided. Combustion-related emissions and  
399 emissions from industrial processes may take advantage of emission monitoring or specific plant  
400 operation conditions, if provided. Emission processes that are not associated with anthropogenic  
401 activities are also not covered in the inventories.

402  
403 Obligations and quality of data provided differ strongly by country category. High scrutiny is put  
404 on GHG inventories from countries listed in Annex-I of the convention (Annex-I countries include  
405 most European countries, U.S. and Canada, Australia and New Zealand, and Japan). Annex-I  
406 countries are obliged to provide annual national inventories in considerable detail and have to be  
407 very transparent also in terms of methodology used and underlying information. Each year, time-  
408 series of emissions and underlying data since 1990 (in a few cases, alternative base years are used)  
409 up to the pre-previous year are freshly provided in April each year (e.g., in April 2023 data up to  
410 the year 2021 had to be provided), leading to a homogeneous data series. Reports and emission

411 data are provided (to UNFCCC, and to all users from the UNFCCC web site at  
 412 <https://unfccc.int/reports>) in standardized format such that they can be transferred to databases.  
 413 National results are routinely being checked and evaluated by expert teams in form of specific  
 414 internal and external audits to assure data quality and consistency.

415  
 416 National information is highly relevant also for non-Annex I countries to the UNFCCC and is  
 417 being collected and distributed by UNFCCC as well. Requirements are much less stringent,  
 418 however, as parties are expected to provide data only according to their own capabilities and the  
 419 support they get from other countries. The so-called Biannual Update Reports are to be prepared  
 420 every other year only. While in principle following the same IPCC guidance, commitments to  
 421 format, timing, and quality assessment are by far less stringent, and the own ambition level of the  
 422 respective party (country) may determine much of the outcome. In any case, self-reporting of a  
 423 country always also means the party is willing to take the responsibility of the emissions reported.

424  
 425 The “EDGAR/UNFCCC” dataset used in this paper utilizes the database for Annex-1 countries  
 426 for emissions from fossil-fuel consumption, industrial processes, waste and wastewater, and  
 427 merges with the respective set derived from EDGARv7.0 for all remaining countries.

428  
 429 **SI-5 The SRNM model:** Flux upscaling model

430 The SRNM model (Wang et al., 2020) was applied to simulate direct cropland-N<sub>2</sub>O emissions. In  
 431 SRNM, N<sub>2</sub>O emissions were simulated from N application rates using a quadratic relationship,  
 432 with spatially variable model parameters that depend on climate, soil properties, and management  
 433 practices. The original version of SRNM was calibrated using field observations only from China  
 434 (Zhou et al., 2015). In this study, we used the global N<sub>2</sub>O observation dataset to train it to create  
 435 maps of gridded annual emission factors of N<sub>2</sub>O and the associated emissions at 5-minute  
 436 resolution from 1901 to 2014 (Cui et al., 2021). The gridded EF and associated direct cropland-  
 437 N<sub>2</sub>O emissions are simulated based on the following equation:

438  
 439

$$E_{ijt} = \alpha_{ij} N_{ijt}^2 + \beta_{ij} N_{ijt} + \varepsilon_{ijt}, \quad \forall i \quad (21)$$

440 where  
 441

$$\alpha_{ij} \sim N\left(\sum_k (x_k \lambda_{ijk}), \sigma_{ijk}^2\right), \quad \beta_{ij} \sim N\left(\sum_k (x_k \phi_{ijk}), \sigma_{ijk}'^2\right) \quad (22)$$

$$\lambda_{ijk} \sim N(\mu_{ijk}, \omega_{ijk}^2), \quad \phi_{ijk} \sim N(\mu_{ijk}', \omega_{ijk}'^2), \quad \varepsilon_{ijt} \sim N(0, \tau^2) \quad (23)$$

442  
 443 and  $i$  denotes the sub-function of N<sub>2</sub>O emission ( $i=1, 2, \dots, I$ ) that applies for a sub-domain division  
 444  $W_i$  of six climate or soil factors,  $j$  represents the type of crop ( $j=1-2$ , 1 for upland crops and 2 for  
 445 paddy rice),  $k$  is the index of climate or soil factors ( $k=1-6$ , i.e., soil pH, clay content, SOC, BD,  
 446 the sum of cumulative precipitation and irrigation, mean daily air temperature).  $W_i$  denotes a set  
 447 of the range of multiple  $x_k$ .  $E_{ijt}$  denotes direct N<sub>2</sub>O emission flux ( $\text{kg N ha}^{-1} \text{ yr}^{-1}$ ) estimated for  
 448 crop type  $j$  in year  $t$  in the  $i$ th sub-domain,  $N_{ijt}$  is N application rate ( $\text{kg N ha}^{-1} \text{ yr}^{-1}$ ), and  $\alpha_{ij}$  and

450  $b_{ij}$  are defined as summation of the product of  $x_k$  and  $l_{ijk}$  over  $k$ . The random terms  $l$  and  $f$  are  
451 assumed to be independent and normally distributed, representing the sensitivity of  $a$  and  $b$  to  $x_k$ .  
452  $e$  is the model error.  $m$  and  $m\phi$  are the mean effect of  $x_k$  for  $a$  and  $b$ , respectively.  $s$ ,  $s\phi$ ,  $w$ ,  $w\phi$ ,  
453 and  $t$  are standard deviations. Optimal sub-domain division, associated parameters mean values and  
454 standard deviations were determined by using the Bayesian Recursive Regression Tree version 2  
455 (BRRT v2), constrained by the extended global cropland-N<sub>2</sub>O observation dataset. The detailed  
456 methodological approach of the BRRT v2 is described by Zhou et al (2015).

457

## 458 **Global cropland N<sub>2</sub>O observation dataset**

459 We aggregated cropland N<sub>2</sub>O flux observation data from 180 globally distributed observation sites  
460 from online databases, on-going observation networks, and peer-reviewed publications (Figure SI-  
461 1). Chamber-based observations were only included in this dataset. These data repositories are as  
462 follows: the NitroEurope, CarbonEurope, GHG-Europe (EU-FP7), GRACEnet, TRAGnet,  
463 NANORP, and 14 meta-analysis datasets (Decock, 2014; Harris et al., 2014; Helgason et al.,  
464 2005; Hénault et al., 2005; Hickman et al., 2014; Kim et al., 2013a; Kim et al., 2013b; Lehuger et  
465 al., 2011; Leppelt et al., 2014; Rochette and Janzen, 2005; Sacks et al., 2010; Shcherbak et al.,  
466 2014; Stehfest and Bouwman, 2006; Walter et al., 2015). Four types of data were excluded from  
467 our analysis: (i) observations without a zero-N control for background N<sub>2</sub>O emission, (ii)  
468 observations from sites that used controlled-release fertilizers or nitrification inhibitors, (iii)  
469 observations not covering the entire crop growing season, (iv) observations made in laboratory or  
470 greenhouse. We then calculated cropland-N<sub>2</sub>O emissions as the difference between observed N<sub>2</sub>O  
471 emission ( $E$ ) and background N<sub>2</sub>O emission ( $E_0$ ). Values of EF were estimated for each nonzero  
472 N application rate ( $N_a$ ) as direct cropland-N<sub>2</sub>O emission divided by  $N_a$ :  $EF = (E - E_0)/N_a$ . This  
473 yielded a global dataset of direct cropland-N<sub>2</sub>O emissions, N-rate-dependent N<sub>2</sub>O EFs and  
474 fertilization records from each site (i.e., 1,052 estimates for upland crops from 152 sites and 154  
475 estimates for paddy rice from 28 sites), along with site-level information on climate, soils, crop  
476 type, and relevant experimental parameters. Total numbers of sites and total measurements in the  
477 dataset were more than doubled those for previous datasets of N<sub>2</sub>O EF. The extended global N<sub>2</sub>O  
478 observation network covered most of fertilized croplands, representing a wide range of  
479 environmental conditions globally. For each site in our dataset, the variables included four broad  
480 categories: N<sub>2</sub>O emissions data, climate data (cumulative precipitation and mean daily air  
481 temperature), soil attributes (soil pH, clay content, SOC, BD), and management-related or  
482 experimental parameters (N application rate, crop type). More details on global cropland N<sub>2</sub>O  
483 observation dataset can be found in Cui et al. (2021).

484

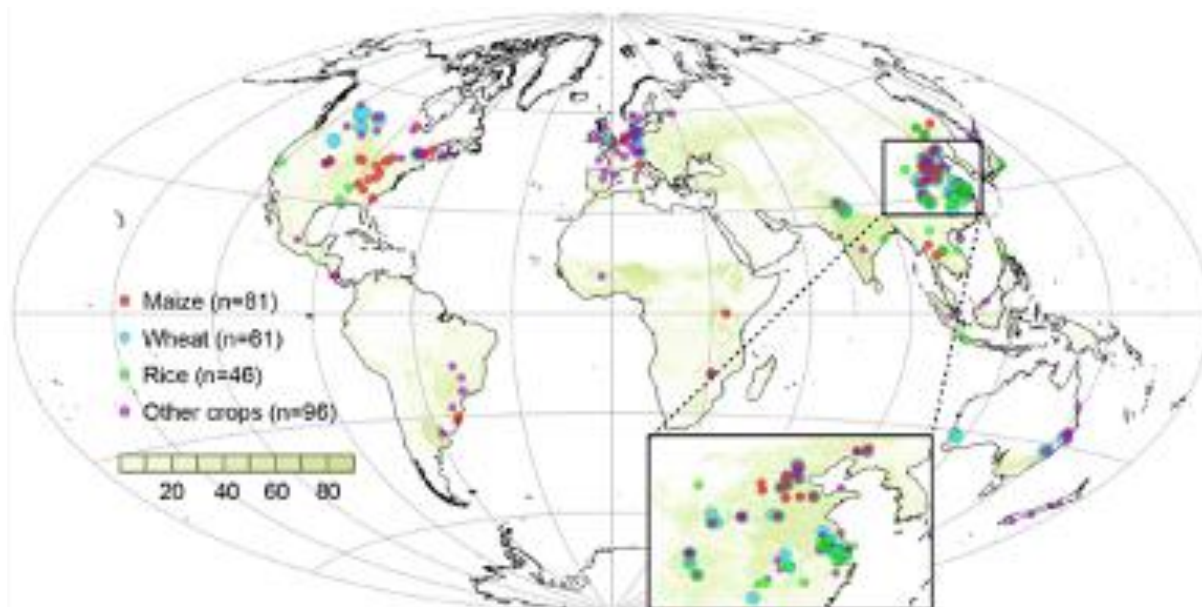

485  
 486 **Figure SI-1 Global observation dataset of N<sub>2</sub>O EF for direct soil emissions.** Green area  
 487 indicates the harvested areas of all crops derived from the Earthstat. Sites are indicated in  
 488 different colors for maize, wheat, rice, and other crops.

489  
 490 **Gridded input datasets:**

491 The updated SRNM model was driven by many input datasets, including climate, soil properties,  
 492 agricultural management practices (e.g., fertilization, tillage, irrigation), as well as the historical  
 493 distribution of cropland. Cumulative precipitation and mean daily air temperature over the growing  
 494 season were acquired from the CRU TS V4.06 climate dataset (0.5-degree resolution) (*Harris et*  
 495 *al.*, 2014), where growing season in each grid cell was identified following *Sacks et al.* (2010). The  
 496 patterns of SOC, clay content, BD, and soil pH were acquired from the HWSD v1.2 (*Berdanier*  
 497 *and Conant*, 2012), 1-km resolution). Both climate and soil properties were re-gridded at 5-arc-  
 498 minute spatial resolution using a first-order conservative interpolation widely used in the CMIP5  
 499 model intercomparison (*Yang et al.*, 2017). The annual cropland area at 5-arc-minute spatial  
 500 resolution from 1961 to 2020 was obtained from the History Database of the Global Environment  
 501 (HYDE 3.2.1) (*Goldewijk et al.*, 2017).

502  
 503 For fertilization, crop-specific N fertilizer inputs (including synthetic N fertilizers, crop residues  
 504 and manure), fertilizer types, and placement during 1961-2020 were obtained from *Adalibieke et*  
 505 *al.*, (2023). The frequency (i.e., one or multiple times) of N fertilization were the same as *Cui et*  
 506 *al.* (2021) and we assumed that the frequency remained constant during the study period. For  
 507 tillage, the fraction of tillage by crop during 1961-2020 was obtained from *Adalibieke et al.*,  
 508 (2023), which was constructed with the country and province (or state) level no-tillage area data  
 509 during 1961-2020 and downscaled to grid with the method of *Porwollik et al.* (2019). For  
 510 irrigation, the History Database of the Global Environment (HYDE version 3.2) (*Goldewijk et al.*,  
 511 2017) and the MIRCA2000 dataset (*Portmann et al.*, 2010) were used to compile the global crop-  
 512 specific irrigation proportion data from year 1961 to 2020. Categories of cropland in HYDE  
 513 provided new distinctions with irrigated and rain-fed crops (upland crops, other than rice), irrigated  
 514 and rain-fed rice during 1960-2017. The national-level dataset of “Agricultural area actually

515 irrigated” was obtained from (FAO, 2022), which was used to scale the baseline year 2015 maps  
516 of irrigated area from HYDE over the period 2016-2020. The area of irrigated upland crops from  
517 HYDE was first disaggregated into 21 crops based on the irrigated proportion from MIRCA2000  
518 for per grid cell. We assumed an even share of irrigated area by each upland crop during the period  
519 1961-2020, like MIRCA2000. Finally, the crop-specific irrigated area was masked by reporting  
520 harvested area, then the irrigated proportion of each crop can be calculated as the crop-specific  
521 irrigated area divided by the physical area of each crop. For rice, we further divided irrigated rice  
522 into continuously and intermittently flooded systems as provided by Cui *et al.* (2021), and we  
523 assumed that the irrigation proportion was kept the same during the study period.  
524

## 525 **SI-6 Global N flow in aquaculture**

526 We applied the IMAGE-GNM aquaculture nutrient budget model for shellfish and finfish  
527 (Bouwman *et al.*, 2013; Bouwman *et al.*, 2011) to calculate the nutrient flows in aquaculture  
528 production systems. These flows comprise feed inputs, retention in the fish, and nutrient excretion.  
529 Individual species within crustaceans, seaweed, fish and molluscs are aggregated to the  
530 International Standard Statistical Classification of Aquatic Animals and Plants (ISSCAAP) groups  
531 (FAO, 2022), for which production characteristics are specified. Feed and nutrient conversion rates  
532 are used for each ISSCAAP group to calculate the feed and nutrient intake based on production  
533 data from FAO (FAO, 2020). Feed types include home-made aquafeeds and commercial  
534 compound feeds with different feed conversion ratios that also vary in time due to efficiency  
535 improvement; in addition, the model accounts for algae in ponds, that are often fertilized with  
536 commercial fertilizers or animal manure, consumed by omnivore fish species like carp. A special  
537 case is the filter-feeding bivalves that filter seston from the water column, and excrete pseudofeces,  
538 feces and dissolved nutrients. Based on production data and tissue/shell nutrient contents, the  
539 model computes the nutrient retention in the fish. Using apparent digestibility coefficients, the  
540 model calculates outflows in the form of feces (i.e., particulate nutrients) and dissolved nutrients.  
541 Finally, nutrient deposition in pond systems and recycling are calculated. For computing the N<sub>2</sub>O  
542 emissions, we consider the amount of N released to the environment, i.e., the difference between  
543 N intake and N in the harvested fish, which includes all the nutrient excretion. Since in pond  
544 cultures part of that N is managed, we made the amount of N recycling explicit, as well as ammonia  
545 emissions from ponds. This is to avoid double counting when computing N<sub>2</sub>O emissions from crop  
546 production.  
547

## 548 **SI-7 Continental Shelves N<sub>2</sub>O fluxes**

549 N<sub>2</sub>O emissions from the global ocean do not include the contribution from continental shelves and  
550 are added here using the extended mask of Laruelle *et al.* (2017) to delineate the coastal ocean.  
551 This mask excludes estuaries and inland water bodies, while its outer limit is set 300 km away  
552 from the shoreline. Within this coastal ocean domain, gridded N<sub>2</sub>O emissions were calculated  
553 using one data-driven estimate and three high-resolution model estimates from two distinct  
554 models, all interpolated on the same 0.25° x 0.25° grid. Models and data are each covering different  
555 time-periods and only one climatology is provided, keeping the original timespan of each product:  
556 1988-2017 for the observation-based product that relied on a random-forest (RF) algorithm to  
557 interpolate N<sub>2</sub>O data (Yang *et al.*, 2020) from the MEMENTO database (MEM-RF) (Kock and  
558 Bange, 2015), 1998-2018 for the estimate relying on the high-resolution configuration (Berthet *et*  
559 *al.*, 2019) of the global ocean-biogeochemical component of CNRM-ESM2-1 (CNRM-0.25°),  
560 1998-2013 and 2006-2013 for the estimates relying on the ECCO-Darwin model running at 1/3°

561 (ECCO-Darwin1) and 1/6° (ECCO-Darwin2), respectively. The resulting climatology can be  
562 considered as broadly representative of the last 2-3 decades. Each product is further described as  
563 follows:

564

#### 565 **MEM-RF**

566 The N<sub>2</sub>O air-sea flux reconstruction by *Yang et al.* (2020) is based on a synthesis of over 158,000  
567 observations of N<sub>2</sub>O mixing ratio, partial pressure, and concentration in the surface ocean from the  
568 MEMENTO database (<https://memento.geomar.de>) (*Kock and Bange, 2015*) and additional  
569 cruises (Dataset S1) (*Yang et al., 2020*). N<sub>2</sub>O measurements are converted to surface N<sub>2</sub>O mixing  
570 ratio anomalies using observations from the NOAA atmospheric flask dataset (*Hall et al., 2007*),  
571 and extrapolated to a 0.25-degree resolution global monthly climatology using an ensemble of 100  
572 random forest realizations. The random forest algorithm predicts N<sub>2</sub>O mixing ratio anomalies  
573 based on their relationship to oceanographic predictors that include hydrographic variables,  
574 nutrients, oxygen, chlorophyll, net primary production, and seafloor depth. Reconstructed mixing  
575 ratio climatologies are used to estimate air-sea fluxes by applying a commonly used gas exchange  
576 parameterization (*Wanninkhof, 2014*). Two formulations of piston velocity are adopted: one based  
577 on a quadratic dependence on wind speed (*Wanninkhof, 2014*), and one that explicitly accounts for  
578 bubble-mediated fluxes (*Liang et al., 2013*). Sea ice cover, surface temperature, salinity and  
579 atmospheric pressure are taken from ERA5 reanalysis (*Hersbach et al., 2017*). Calculations are  
580 performed with two high-resolution wind products (ERA5 and CCMP) that are available at 0.25,  
581 6-hourly resolution for the period from 1988 to 2017, yielding four permutations of the piston  
582 velocity. The resulting ensemble of 400 global N<sub>2</sub>O air-sea flux estimates is averaged in time to  
583 obtain monthly mean climatologies. A description of the dataset and methods is presented in *Yang*  
584 *et al.* (2020). The code used to produce these datasets is archived on a public GitHub repository at  
585 <https://github.com/yangsi7/mapping-ocean-n2o> (DOI: 10.5281/zenodo.3757194).

586

#### 587 **CNRM-0.25°**

588 N<sub>2</sub>O fluxes have been inferred from the global ocean-biogeochemical component of CNRM-  
589 ESM2-1 (*Séférian et al., 2019*) run at 0.25° horizontal resolution with 75 vertical levels in the  
590 ocean. This high-resolution configuration is described in *Berthet et al.* (2019) and is based on the  
591 NEMOv3.6 oceanic model (*Madec, 2008*), the multi-category sea ice model GELATOv6 (*Salas y*  
592 *Mélie, 2002*) and the PISCESv2-gas model for marine biogeochemistry (*Aumont et al., 2015*),  
593 which includes an updated version of (*Martinez-Rey et al., 2015*) for the marine N<sub>2</sub>O module.  
594 The simulation was first spun-up during 300 years under preindustrial conditions and then has  
595 been forced by the OMIP2-compliant JRA55-do-1-5 atmospheric reanalysis (*Tsujino et al., 2020*;  
596 *Tsujino et al., 2018*) considering the historical evolution of CO<sub>2</sub> and N<sub>2</sub>O in the atmosphere since  
597 the year 1850. Boundary conditions for nitrogen deposition and riverine inputs are prescribed from  
598 monthly climatologies. The suboxic production of N<sub>2</sub>O uses the oxygen-dependent formulation of  
599 *Jin and Gruber* (2003) and is enhanced at low oxygen concentrations. This formulation  
600 encompasses N<sub>2</sub>O production during remineralization, nitrification and grazing, as well as a sink  
601 term corresponding to N<sub>2</sub>O consumption under anoxic conditions by denitrification. The  
602 oceanic N<sub>2</sub>O partial pressure is computed based on the surface N<sub>2</sub>O concentration and the N<sub>2</sub>O  
603 solubility in the ocean. Sea-to-air N<sub>2</sub>O fluxes are then computed using the standard gas exchange  
604 parameterization of *Wanninkhof* (1992; 2014).

605

#### 606 **ECCO-Darwin & ECCO2-Darwin**



607 To generate global air-sea fluxes of nitrous oxide (N<sub>2</sub>O) from the global ocean we have used the  
608 ECCO-Darwin Model (*Carroll et al.*, 2020). The ECCO-Darwin model is based on MITgcm and  
609 it has a nominal horizontal resolution of 1/3 of a degree with 50 vertical levels where in the top  
610 100 meters the model is vertically resolved with 10-meter grid boxes. The ECCO-Darwin model  
611 is forced with an atmospheric forcing corresponding to the 1992-present optimized with adjoint  
612 technique in order to realistically represent the observed physical climate phenomena such as El  
613 Nino, the Pacific Decadal Oscillation, the North Pacific “Warm Blob”, etc. A more detailed  
614 description of the model forcing and the Darwin biogeochemical model configuration used in this  
615 study can be found in *Carroll et al.* (2020).

616  
617 The Darwin biogeochemical/ecological model (*Carroll et al.*, 2020; *Manizza et al.*, 2019) used for  
618 this study carries 33 biogeochemical tracers to explicitly represent the cycle of carbon, oxygen,  
619 phosphorus, silica, and iron in the global ocean. For this particular version of the model, we  
620 implemented a parameterization of the oceanic cycle of N<sub>2</sub>O using the scheme of *Nevison et al.*  
621 (2003) based on the oceanic oxygen cycle previously represented in ECCO2-Darwin model  
622 (*Ganesan et al.*, 2020). The air-sea gas flux of N<sub>2</sub>O was parameterized according to *Wanninkhof*  
623 (1992). In addition, a thermal- only N<sub>2</sub>O tracer (a tracer in which biogeochemical sources and sinks  
624 are suppressed but with the same solubility as N<sub>2</sub>O) was also added to the model to isolate the  
625 process of ocean ventilation affecting the N<sub>2</sub>O concentration in the ocean at seasonal time scales  
626 as done in *Manizza et al.* (2012). The ECCO-Darwin numerical simulation was run for the 1992-  
627 2014 period, but we discarded the inclusion of the output relative to the 1992-1996 period in our  
628 analysis due to the model adjustment in this initial part of our numerical simulation.

629

### 630 **SI-8 Open Ocean N<sub>2</sub>O fluxes**

631 N<sub>2</sub>O is produced in the open ocean by microbial activity during organic matter cycling in the  
632 subsurface ocean, and its production pathways are influenced by the local environmental oxygen  
633 level. In the oxic ocean N<sub>2</sub>O is produced as a byproduct during the oxidation of ammonia to nitrate,  
634 mediated by ammonia oxidizing bacteria and archaea. N<sub>2</sub>O is also produced and consumed in sub-  
635 oxic and anoxic waters through the action of marine denitrifiers during the multi-step reduction of  
636 nitrate to gaseous N. The oceanic N<sub>2</sub>O distribution therefore displays significant heterogeneity  
637 with background levels of 10-20 nmol/l in the well-oxygenated ocean basins, high concentrations  
638 (> 40 nmol/l) in hypoxic waters, and N<sub>2</sub>O depletion in the core of ocean oxygen minimum zones  
639 (OMZs).

640

641 For this synthesis open ocean N<sub>2</sub>O emissions to the atmosphere were compiled from four global  
642 ocean biogeochemistry models/Earth System models that simulate the production, consumption  
643 and circulation of oceanic N<sub>2</sub>O (Table 6). N<sub>2</sub>O flux exchange between ocean and atmosphere is  
644 derived using gas-exchange parameterizations applied to modeled surface ocean N<sub>2</sub>O. Versions of  
645 the four submitting models also participated in the previous N<sub>2</sub>O budget synthesis (*Tian et al.*,  
646 2020a). Model details and updates to the previous N<sub>2</sub>O budget synthesis are summarized below.

647 The models differ in aspects of physical configuration (e.g., spatial resolution), meteorological  
648 forcing applied at the ocean surface, and in their parameterizations of ocean biogeochemistry;  
649 specific details on individual models are provided in the publications listed in Table 1. Towards  
650 this N<sub>2</sub>O budget synthesis, modelling groups reported grid-resolved (1°×1° horizontal resolution)  
651 monthly estimates of ocean-atmosphere N<sub>2</sub>O fluxes for the period 1980-2020 (or for as many years  
652 as possible in that period).

653

654 **U. Bern: Bern-3D**

655 N<sub>2</sub>O fluxes are derived from the Bern-3D Earth System Model of Intermediate Complexity which  
656 includes a prognostic marine biogeochemistry model (based on (*Parekh et al.*, 2008) and (*Tschumi*  
657 *et al.*, 2011)). Configuration of the model for simulation of N<sub>2</sub>O is outlined in *Battaglia and Joos*  
658 (2018). Model simulations were run at a native resolution of horizontal resolution of 41 by 40 grid  
659 cells and 32 logarithmically scaled vertical layers. Modifications of the biogeochemistry model  
660 relevant for the N<sub>2</sub>O cycle include the assignment of organic matter remineralization to aerobic  
661 and anaerobic pathways dependent on mean grid-cell dissolved oxygen level. N<sub>2</sub>O is produced by  
662 nitrification as a product of remineralization rate and a specified N<sub>2</sub>O yield which has a functional  
663 form dependent on oxygen level (see details in (*Battaglia and Joos*, 2018)). N<sub>2</sub>O consumption by  
664 denitrification processes is represented by a first-order kinetics formulation which also includes a  
665 dependence on local oxygen level to account for the relative importance of denitrification-related  
666 N<sub>2</sub>O production and consumption processes in each gridcell. Measurements of dissolved N<sub>2</sub>O  
667 (surface and interior) from the MEMENTO database (*Kock and Bange*, 2015) together with an  
668 ensemble of model runs are used to constrain the model parameters governing N<sub>2</sub>O production and  
669 consumption mechanisms. From a pre-industrial equilibrium state the model is forced by historical  
670 CO<sub>2</sub> emissions, non-CO<sub>2</sub> radiative forcing, and land-use changes. N<sub>2</sub>O in the atmosphere is prescribed  
671 based on historical data.

672

673 **CNRM: CNRM-ESM2-1**

674 N<sub>2</sub>O fluxes are provided by the CNRM-ESM2-1 Earth System model. The ocean model  
675 component is based on NEMO Version 3.6 (*Madec et al.*, 2017) and coupled to the GELATO sea  
676 ice model (*Salas y Méliá*, 2002) Version 6 and the marine biogeochemical model PISCESv2-gas  
677 (*Aumont et al.*, 2015). The spatial model resolution follows the eORCA1L75 grid, with a nominal  
678 horizontal resolution of 1° and with higher resolution in the tropics (increasing to ~ $(1/3)^\circ$ ). The  
679 model has 75 vertical levels with higher resolution towards the ocean surface. The simulations  
680 were forced at the surface by the atmospheric state of JRA55-do v1.5.0 (*Tsujino et al.*, 2018).  
681 Atmospheric N<sub>2</sub>O concentration is given as annual means as specified by CMIP6 protocols and is  
682 linearly interpolated in time. Parameterization of the marine N<sub>2</sub>O cycle follows that of *Martinez-*  
683 *Rey et al.* (2015) with some modifications. N<sub>2</sub>O production is driven by an oxygen-dependent yield  
684 of N<sub>2</sub>O, which encompasses production from denitrification and nitrification processes. This  
685 formulation also assumes a constant background yield representing N<sub>2</sub>O production by nitrification  
686 and a consumption of N<sub>2</sub>O in suboxic conditions. Originally implemented by *Martinez-Rey et al.*  
687 (2015), the marine N<sub>2</sub>O parameterization has benefited from a recoding and an improved  
688 calibration presented in *Berthet et al.* (2023). Further details of the model biogeochemistry and  
689 configuration are provided by *Séférián et al.* (2019) and *Berthet et al.* (2019).

690

691 **UVic2.9**

692 N<sub>2</sub>O model fluxes are derived from the UVic2.9, Earth System Model of Intermediate Complexity  
693 with prescribed monthly climatological winds (*Kalnay et al.*, 1996) and ice sheets (*Peltier*, 2004),  
694 configuration outlined in *Landolfi et al.* (2017). Oceanic subsurface N<sub>2</sub>O production is  
695 parameterized following (*Zamora and Oschlies*, 2014), as a function of O<sub>2</sub> consumption with a  
696 linear O<sub>2</sub> dependency, inherently including both nitrification and denitrification. In O<sub>2</sub>-deficient  
697 waters (<4 mmol m<sup>-3</sup>), denitrification becomes a sink of N<sub>2</sub>O consumed at a constant rate. The

698 gradient driving the air-sea N<sub>2</sub>O gas exchange, is computed online based on departure of the  
699 surface ocean concentration from the saturation value using the solubility coefficients of *Weiss*  
700 *and Price* (1980) and time-varying prescribed atmospheric N<sub>2</sub>O concentrations (historical and  
701 RCP8.5). The model was spun-up for 6000 years with preindustrial boundary conditions (solar  
702 and volcanic and aerosol forcing, fixed atmospheric CO<sub>2</sub> of 280 ppm and N<sub>2</sub>O of 276 ppb, and  
703 preindustrial atmospheric N deposition).  
704

## 705 **UEA: NEMO-PlankTOM10.2**

706 N<sub>2</sub>O model fluxes are derived from the NEMO-PlankTOM10.2 ocean model. The physical  
707 circulation component is NEMO v3.1 (*Madec*, 2008), with horizontal resolution of 2° longitude,  
708 and a variable latitudinal resolution (average ~1°) with higher resolution in the tropics and polar  
709 regions. The model has 30 vertical layers, with variable resolution ranging from 10m in the upper  
710 100m to 500m at depths of 5000 m. The biogeochemical component relies on the marine ecosystem  
711 model PlankTOM10, which includes representation of 10 plankton functional types (*Le Quéré et*  
712 *al.*, 2016). It has been extended by *Buitenhuis et al.* (2018) to include nitrogen cycle processes,  
713 and prognostic and diagnostic models of N<sub>2</sub>O production. N<sub>2</sub>O is produced from nitrification and  
714 denitrification pathways, with oxygen dependent yields employed to account for varying  
715 production and consumption processes in hypoxic waters. Nitrogen cycle parameters are optimized  
716 using ocean databases of dissolved N<sub>2</sub>O (MEMENTO, *Kock and Bange* (2015)) nitrification rates  
717 (*Yool et al.*, 2007), and surface ammonium concentrations (*Johnson et al.*, 2015; *Paulot et al.*,  
718 2015). Further details on model configuration are provided in (*Buitenhuis et al.*, 2018).  
719

## 720 **SI-9 Net N<sub>2</sub>O emission from land cover change**

721 This section mainly involves the calculation of post-deforestation N<sub>2</sub>O emissions, deforestation  
722 induced N<sub>2</sub>O reduction and N<sub>2</sub>O emissions from forest regrowth (afforestation or reforestation).  
723 The methods include both bookkeeping and process-based modeling.  
724

### 725 **a. Deforestation area, crop/pasture expansion and secondary forests**

726 The LUH2 v2h (land use harmonization, <http://luh.umd.edu>) land use data was used to derive the  
727 deforestation area and its partition between crops and pastures during 1860–2020. LUH2  
728 categorizes forest lands into forested primary land and potentially forested secondary land, while  
729 croplands are divided into C3 annual crops, C3 perennial crops, C4 annual crops, C4 perennial  
730 crops, and C3 N-fixing crops.  
731

732 In the empirical computation of deforestation induced N<sub>2</sub>O emissions, all sub-classes within each  
733 land use type were treated the same. Thus, only the annual transition area from forests to croplands  
734 or managed pasture was needed. In the process-based estimates, the DLEM model was improved  
735 to further account for the classifications of primary forests, secondary forests (further partitioned  
736 into established and newly converted by an age threshold of 15 years), croplands/pastures  
737 /rangelands (further partitioned into established and newly converted by an age threshold of seven  
738 nine years). Each land use type can be divided into several different plant functional types (PFTs).  
739 Specifically, within a grid cell, cropland can only be dominated by only one crop type. The pastures  
740 and rangelands can be either C3 type or C4 type. To generate the historical spatial distribution of  
741 PFTs, a potential vegetation map and the accompanied composition ratio map of each natural PFT  
742 acquired from the Synergetic Land Cover Product (SYNMAP) were jointly used with LUH2 v2h.

743  
744  
745  
746  
747  
748  
749  
750  
751  
752  
753  
754  
755  
756  
757  
758  
759  
760  
761  
762  
763  
764  
765  
766  
767  
768  
769  
770  
771  
772  
773  
774  
775  
776  
777  
778  
779  
780  
781  
782  
783  
784  
785  
786  
787

## **b. Methods**

The bookkeeping method was mainly applied to the tropical areas, where forests generally have high N<sub>2</sub>O emissions. Specifically, the average tropical forest N<sub>2</sub>O emission rate of 1.974 kg N<sub>2</sub>O-N ha<sup>-1</sup> yr<sup>-1</sup> was adopted as the baseline. Two logarithmic response curves of soil N<sub>2</sub>O emissions (normalized to the baseline) after deforestation were developed:  $y = -0.31\ln(x) + 1.53$  and  $y = -0.454\ln(x) + 2.21$ . This form of the response functions can effectively reproduce the short-lived increase in soil N<sub>2</sub>O emissions after initial forest clearing and the gradually declining emission rates of converted crops/pastures (Melillo *et al.*, 2001; Verchot *et al.*, 1999). Using these two curves and the baseline, we kept track of the N<sub>2</sub>O reduction of tropical forests and the post-deforestation crop/pasture N<sub>2</sub>O emissions at an annual timescale.

There are not many studies on N<sub>2</sub>O emissions from secondary tropical forests that regrowth after crop or pasture abandonment. Sullivan *et al.* (2019) lumped together all forms of N "gas loss" including NO and N<sub>2</sub>O for secondary forests across the tropics and the results showed gas loss gradually increases with age since the regrowth of secondary forest. Keller and Reiners (1994) also reported a gradual recovery of soil nitrate and soil emissions of N<sub>2</sub>O and nitric oxide (NO) during 20 years of secondary forest succession, which however did not return to the level of the primary forests. In this study, using field observations from Davidson *et al.* (2007) and Keller and Reiners (1994), we regressed normalized N<sub>2</sub>O emissions (relative to a reference mature forest) of secondary tropical forests with their ages as  $y = 0.0084x + 0.2401$  ( $R^2 = 0.44$ ; unit of  $x$  is year). The derived  $y$  values were multiplied by tropical forest N<sub>2</sub>O emissions estimated by NMIP2 models that do not distinguish secondary forests from primary forests.

The DLEM model was run with varying climate and CO<sub>2</sub> with other factors held constant to estimate forest baseline emissions and unfertilized crop/pasture emissions from 1860-2020. The climate data were acquired from CRUJRA, which is a fusion of the CRU and JRA reanalysis products at a spatial resolution of 0.5° × 0.5° and a daily time-step. The atmospheric CO<sub>2</sub> data were obtained from NOAA GLOBLVIEW-CO<sub>2</sub> dataset (<https://www.esrl.noaa.gov>), which are derived from atmospheric and ice core measurements. In the tropical area, both estimates from the DLEM model and the bookkeeping method were adopted, whereas in extra-tropical area, we only adopted the DLEM outputs.

## **SI-10 Inland water, estuaries, and coastal vegetation**

### **a. Dynamic Land Ecosystem Model-Terrestrial/Aquatic Continuum (DLEM-TAC)**

To quantify N<sub>2</sub>O emissions from global inland waters (rivers, lakes, and reservoirs), we use a process-based coupled terrestrial-aquatic model, which builds up on the Dynamic Land Ecosystem Model (DLEM). DLEM-TAC is a fully distributed, process-based land surface model which couples the major land processes (terrestrial hydrology, plant phenology and physiology, soil biogeochemistry) and aquatic dynamics (lateral transport and in-stream biogeochemistry) (Pan *et al.*, 2021; Tian *et al.*, 2015; Tian *et al.*, 2020b; Yao *et al.*, 2020). The land component of DLEM-TAC explicitly simulates the carbon, nitrogen, and water fluxes between plants, soil, and atmosphere, and the surface and drainage runoff and nitrogen load from the land module are used as input for the aquatic module. The simulated nitrogen load includes dissolved inorganic

788 nitrogen (DIN), dissolved organic nitrogen (DON), particulate organic nitrogen (PON), and  
789 runoffs, sewers as the initial condition of the aquatic module.

790  
791 DLEM-TAC aquatic module calculated lateral water transport and the associated aquatic  
792 biogeochemical processes by adopting a scale-adaptive scheme. The water transport scheme,  
793 which coupled hillslope flow, subnetwork flow, and main channel flow, simulated the water  
794 transport processes within grid cells. In the aquatic module, lakes and reservoirs were linked with  
795 small streams and large rivers, forming a river-lake-reservoir corridor (*Wollheim et al., 2008*).  
796 Particularly, lakes that are linked to small streams are typically small in size and are defined as  
797 small lakes, while those linked to large rivers are usually had large size and are defined as large  
798 lakes; similarly, reservoirs that are linked to main channels are considered as large reservoirs,  
799 while those that are linked to small streams are considered as small reservoirs. The incoming flow  
800 of a linked river-lake-reservoir corridor drains to lakes first, and the outflow rate of lakes and  
801 reservoirs is determined based on the predefined residence time obtained from the global lake  
802 dataset (*Lehner et al., 2011; Messenger et al., 2016; Yao et al., 2022*). The aquatic N module was  
803 developed based on the scale adaptive water transport scheme, including lateral transport,  
804 decomposition of organic matter, particle organic matter deposition, nitrification, and  
805 denitrification. The detailed description could be found in the previous studies (*Pan et al., 2021;*  
806 *Tian et al., 2020b; Yao et al., 2020*).

807  
808 Following our previous work referring to the development of water transport and biogeochemistry,  
809 we developed an inland water N<sub>2</sub>O module within the aquatic biogeochemical component of the  
810 DLEM framework (*Yao et al., 2020*). The net fluxes of dissolved N<sub>2</sub>O (including physical and  
811 biogeochemical processes) in the main channel (high-order streams) and subnetwork (small rivers)  
812 are estimated as:

$$813 \quad (\Delta M_{N_2O}) / \Delta t = F_a + Y_{water} + D - R - E \quad (20)$$

814 where M<sub>N2O</sub> is the total mass of dissolved N<sub>2</sub>O in the main channel or subnetworks (g N), Δt is  
815 the time step, F<sub>a</sub> is advective N<sub>2</sub>O fluxes (g N d<sup>-1</sup>), Y<sub>water</sub> is the N<sub>2</sub>O production within the water  
816 column (g N d<sup>-1</sup>), D is the dissolved N<sub>2</sub>O from rainfall to rivers (i.e. deposition) (g N d<sup>-1</sup>) with an  
817 initial concentration equal to the atmospheric equilibrium N<sub>2</sub>O concentration, R is the flux from  
818 N<sub>2</sub>O reduction (g N d<sup>-1</sup>) to nitrogen gas, and E is the riverine N<sub>2</sub>O efflux (g N d<sup>-1</sup>) through the air-  
819 water interface.

820  
821 Input data. The driving data of DLEM-TAC include the climate variables, atmospheric CO<sub>2</sub>  
822 concentration, land use change, nitrogen (N) deposition, N fertilizer, and manure application with  
823 a spatial resolution of 0.5° × 0.5°. The daily climate variables (precipitation, mean temperature,  
824 maximum temperature, minimum temperature, and shortwave radiation) were obtained from the  
825 CRUNCEP dataset (<https://vesg.ipsl.upmc.fr>) for 1901-2019. Climate data of each year during  
826 1850-1900 was randomly sampled from 1901-1920. Annual atmospheric CO<sub>2</sub> concentration from  
827 1900-2019 was obtained from the NOAA GLOBALVIEW-CO<sub>2</sub> dataset  
828 (<https://www.esrl.noaa.gov>). The annual land use change data was derived from a potential natural  
829 vegetation map (synergetic land cover product) and a prescribed cropland area dataset from the

830 history database of the global environment v.3.2 (HYDE 3.2, ftp://ftp.pbl.nl/hyde). The data of N  
831 fertilizer, manure N application, and N deposition data was obtained from (Tian *et al.*, 2022).

832  
833 In the aquatic module, the required channel dataset included channel slope, channel width, and  
834 channel length generated from the Hydroshed dataset (Lehner *et al.*, 2008) and DDM30 dataset  
835 (Döll and Lehner, 2002). The flow direction and distance data were obtained from the Dominant  
836 River Tracing (DRT) dataset. For modeling water dynamics in lakes and reservoirs, we generated  
837 0.5 grid level surface water area, upstream area, volume, depth, and average residence time for  
838 lakes based on the Hydrolakes dataset (Messenger *et al.*, 2016), while the GRanD database provided  
839 the same information for reservoirs (Lehner *et al.*, 2011).

840  
841 Simulation protocol. DLEM-TAC simulations include three steps: equilibrium run, spin-up run  
842 and two transit runs, one with dam operation close, and another one with dam operation open.  
843 First, the equilibrium run is required to obtain the initial and steady condition of carbon, nitrogen,  
844 and water pool at the pre-industrial level in each grid cell (Thornton and Rosenbloom, 2005). In  
845 this step, we held all the driving forces such as climate data, atmospheric CO<sub>2</sub> concentration, land  
846 use data, and nitrogen additions consistent with the first year's data we used in the simulation.  
847 Second, we conducted a 30-year spin-up run by randomly selecting climate data within the 1850s  
848 (Tian *et al.*, 2012a). This step can alleviate the disturbance of driving data changes in the transit  
849 run. Then we conduct the natural flow simulation with the dam model temporarily closed, and all  
850 the driving forces change over time. After the natural flow simulation, we set up a management  
851 flow simulation with the dam module open, specifically the dam module needs natural flow in the  
852 previous run as model input.

853  
854 **b. Mechanistic Stochastic Modeling of N<sub>2</sub>O emissions from large rivers, lakes, reservoirs,**  
855 **and estuaries:**

856  
857 To calculate the cascading loads of TN and TP delivered to each water body along the river–  
858 reservoir–estuary continuum, we spatially routed all reservoirs from the GRanD database (Lehner  
859 *et al.*, 2011), with river networks from Hydrosheds 15s (Lehner *et al.*, 2008) and, at latitudes above  
860 50°N, Hydro1K (<http://edc.usgs.gov/products/elevation/gtopo30/hydro/>), which were in turn  
861 connected to estuaries as represented in the “Worldwide Typology of Nearshore Coastal Systems”  
862 of Dürr *et al.* (2011). In addition, the global database HydroLAKES (Messenger *et al.*, 2016) was  
863 used to topologically connect 1.4 million lakes with a minimum surface area of 0.1 km<sup>2</sup> within the  
864 river network. Note that besides natural lakes, HydroLAKES includes updated information on  
865 6,796 reservoirs from the GRanD database, which was used in the study of Maavara *et al.* (2019).  
866 In order to estimate the TN and TP loads to each water body, we then relied on a spatially explicit  
867 representation of TN and TP mobilization from the watershed into the river network (see (Maavara  
868 *et al.*, 2019) for details (Bouwman *et al.*, 2009; Van Drecht *et al.*, 2009).

869  
870 For the estimation of N<sub>2</sub>O emission, we applied two distinct model configurations, respectively  
871 named DS1 and DS2 in Maavara *et al.* (2019). DS1 estimates N<sub>2</sub>O emissions from denitrification  
872 and nitrification based on an EF of 0.9%, which is in the mean of published values (Beaulieu *et al.*,  
873 2011), and the assumption that N<sub>2</sub>O production equals N<sub>2</sub>O emissions (Maavara *et al.*, 2019).  
874 For DS2, the reduction of N<sub>2</sub>O to N<sub>2</sub> during denitrification if N<sub>2</sub>O is not evading sufficiently  
875 rapidly from the water body is considered. The fluxes in the model represent lumped sediment-

876 water column rates and were resolved at the annual timescale. The use of water residence time as  
877 an independent variable in both the mechanistic model and the upscaling process introduces an  
878 important kinetic refinement to existing global N<sub>2</sub>O emission estimates. Rather than applying an  
879 average EF (directly scaling N<sub>2</sub>O emissions to N inputs) to all water bodies, the use of water  
880 residence time explicitly adjusts for the extent of N<sub>2</sub>O production and emission that is kinetically  
881 possible within the timeframe available in a given water body. Simulated N<sub>2</sub>O emission rates were  
882 evaluated against UNFCCC measurement-based upscaling methods applied to reservoirs (*Deemer*  
883 *et al.*, 2016) and rivers (*Hu et al.*, 2016) as well as a UNFCCC observation-driven regional estimate  
884 of lake N<sub>2</sub>O emissions based on literature data (*Lauerwald et al.*, 2019).

885

### 886 **c. Meta analysis-based N<sub>2</sub>O emissions from large rivers**

887 Data from 70 published studies between 1998 and 2016 that provided N<sub>2</sub>O emission from streams  
888 and rivers were compiled by *Hu et al.* (2016). The N<sub>2</sub>O emission factors (EF = N<sub>2</sub>O /DIN) and  
889 emission rates (ER = EF \* DIN load, kg N<sub>2</sub>O-N yr<sup>-1</sup>) were calculated for each studied river.  
890 Exploratory multiple regression analyses were conducted to predict EF and ER using various  
891 combinations of factors (N concentrations, loads, yields, DOC: DIN, discharge, and watershed  
892 area) and different functions. Among them, DIN yield (kg N yr<sup>-1</sup> km<sup>-2</sup>) was identified as the best  
893 predictor of EF and ER. Using the optimal model and DIN loads for 6400 global rivers calculated  
894 by the NEWS2-DIN-S model (*McCrackin et al.*, 2014), we estimated global riverine N<sub>2</sub>O  
895 emissions (*Hu et al.*, 2016).

896

### 897 **d. Stream and river N<sub>2</sub>O emissions combining machine-learning and model-based** 898 **upscaling**

899 *Marzadri et al.* (2021) developed a novel approach that combines a data-driven Random Forest  
900 Machine Learning (RM-ML) model with a physically-based upscaling model to predict near global  
901 (neglecting Arctic and Antarctic areas) riverine N<sub>2</sub>O emissions flux (F\*N<sub>2</sub>O given by the ratio  
902 between the flux of N<sub>2</sub>O, FN<sub>2</sub>O, and the in-stream flux of dissolved inorganic nitrogen species  
903 FDIN) from both surface (i.e. water column) and subsurface (i.e. benthic zone and hyporheic zone)  
904 riverine environments. In particular, to capture the local scale processes responsible for N<sub>2</sub>O  
905 emissions and to provide estimations at different spatial scales (from local reach up to the global  
906 scale) the model compute two different denitrification Damköhler numbers (given by the ratio  
907 between a characteristics time of transport and a characteristics time of denitrification (*Marzadri*  
908 *et al.*, 2021; *Marzadri et al.*, 2017)) starting from the hydro-morphological and biogeochemical  
909 information provided by the RM-ML model. Model results at the local reach scale shows that  
910 nearly 50% of the riverine N<sub>2</sub>O emissions comes from small streams (i.e. widths lower than 10 m,  
911 although they represent only the 13% of the total riverine surface area worldwide) while at the  
912 large scale predict a near-global annual riverine N<sub>2</sub>O emissions around 72.8 GgN<sub>2</sub>O – N/yr.

913

### 914 **e. Meta-analysis based N<sub>2</sub>O emissions from estuaries and coastal vegetation**

915 N<sub>2</sub>O emissions from estuaries and coastal vegetated ecosystems were obtained from a meta-  
916 analysis of observed N<sub>2</sub>O fluxes (*Rosentreter et al.*, 2023). In brief, the meta-data analysis relies  
917 on a categorization of estuaries into ‘tidal systems and deltas’, ‘lagoons’, and ‘fjords’. Water-air  
918 N<sub>2</sub>O fluxes from 123 estuary sites globally were then compiled from peer-reviewed publications  
919 until the end of 2020. Coastal vegetation comprises ‘mangrove’, ‘salt marsh’, and ‘seagrass’  
920 ecosystems and N<sub>2</sub>O sediment-water-air fluxes were compiled from 55 sites globally from peer-

921 reviewed publications until the end of 2020. A non-parametric bootstrapping method (1000  
 922 iterations of the median of samples) was used to resample N<sub>2</sub>O fluxes per unit area for each estuary  
 923 and coastal vegetation type in each of the 18 regions using the ‘boot’ function in the package ‘boot’  
 924 in R software. Results from the bootstrapping output (minimum, Q1, median, mean, Q3,  
 925 maximum) were then scaled to the surface area of each estuary and coastal vegetation type in each  
 926 of the 18 RECCAP regions. If an ecosystem type had less than three sites in a region, we applied  
 927 the global statistics of this type in this region. Note that the meta-data analysis only provides flux  
 928 assessments at the scale of the 18 regions.

929

### 930 **SI-11 Atmospheric inversion models**

931 Emissions were estimated using four independent atmospheric inversion frameworks (see Table  
 932 1). The frameworks all used a Bayesian inversion method. The approach used here finds the  
 933 maximum posteriori (MAP), or optimal, estimate of emissions, that is, those, which when coupled  
 934 to a model of atmospheric transport, provide the best agreement to observed N<sub>2</sub>O mixing ratios  
 935 while being guided by their prior probability. In this particular case, where both the likelihood and  
 936 prior probability are assumed to be distributed normally, the optimal emissions are equivalent to  
 937 those that minimize the cost function,

938

$$939 \quad J(\mathbf{x}) = \frac{1}{2}(\mathbf{x} - \mathbf{x}_b)^T \mathbf{B}^{-1}(\mathbf{x} - \mathbf{x}_b) + \frac{1}{2}(\mathbf{y} - H(\mathbf{x}))^T \mathbf{R}^{-1}(\mathbf{y} - H(\mathbf{x})) \quad (24)$$

940

941 where  $\mathbf{x}$  and  $\mathbf{x}_b$  are, respectively, vectors of the multivariate means of the posterior and prior  
 942 emission distributions,  $\mathbf{B}$  is the prior error covariance matrix for emissions,  $\mathbf{y}$  is a vector of  
 943 observed N<sub>2</sub>O mixing ratios,  $\mathbf{R}$  is the observation error covariance matrix, and  $H(\mathbf{x})$  is the model  
 944 of atmospheric transport (for details on the inversion method see (*Tarantola, 2005*)). The optimal  
 945 emissions,  $\mathbf{x}$ , were found by solving the first order derivative of equation (21):

946

$$947 \quad J'(\mathbf{x}) = \mathbf{B}^{-1}(\mathbf{x} - \mathbf{x}_b) + (H'(\mathbf{x}))^T \mathbf{R}^{-1}(\mathbf{y} - H(\mathbf{x})) = 0 \quad (25)$$

948

949 where  $(H'(\mathbf{x}))^T$  is the sensitivity of the atmospheric observations to emissions, derived from an  
 950 adjoint model of transport. In frameworks INVICAT, PyVAR-CAMS and GEOS-Chem, equation  
 951 (5b) was solved using a variational approach (*Thompson et al., 2014; Wells et al., 2015; Wilson et*  
 952 *al., 2014*), which uses a descent algorithm and computations involving the forward and adjoint  
 953 models. In framework MIROC4-ACTM (*Patra et al., 2018*), equation (22) was solved directly by  
 954 computing a transport operator,  $\mathbf{H}$  from integrations of the forward model, such that  $\mathbf{H}\mathbf{x}$  is  
 955 equivalent to  $H(\mathbf{x})$ , and taking the transpose of  $\mathbf{H}$  (*Patra et al., 2022*).

956

957 Each of the inversion frameworks used a different model of atmospheric transport with different  
 958 horizontal and vertical resolutions (see Table 1). The transport models TOMCAT and LMDz5,  
 959 used in INVICAT and PyVAR-CAMS respectively, were driven by ECMWF ERA-5 and ERA-  
 960 Interim wind fields respectively, MIROC4-ACTM was driven by JRA-55 wind fields, and GEOS-  
 961 Chem was driven by MERRA-2 wind fields. While INVICAT, PyVAR-CAMS, and GEOS-Chem  
 962 optimized the emissions at the spatial resolution of the transport model, MIROC4-ACTM  
 963 optimized the error in the emissions aggregated into 84 land and ocean regions. All frameworks  
 964 optimized the emissions with monthly temporal resolution. The transport models included an



965 online calculation of the loss of N<sub>2</sub>O in the stratosphere due to photolysis and oxidation by O(<sup>1</sup>D)  
966 resulting in mean atmospheric lifetimes of between 118 and 129 years, broadly consistent with  
967 recent independent estimates of the lifetime of 116±9 yr (*Prather et al.*, 2015)).

968  
969 All inversions used N<sub>2</sub>O measurements of discrete air samples from the National Oceanic and  
970 Atmospheric Administration Carbon Cycle Cooperative Global Air Sampling Network (NOAA).  
971 In addition, discrete measurements from the Commonwealth Scientific and Industrial Research  
972 Organisation network (CSIRO) as well as in-situ measurements from the Advanced Global  
973 Atmospheric Gases Experiment network (AGAGE), the NOAA CATS network, and from  
974 individual sites operated by University of Edinburgh (UE), National Institute for Environmental  
975 Studies (NIES), the Finnish Meteorological Institute (FMI) and the Japan Meteorological Agency  
976 (JMA) were included in INVICAT, PyVAR-CAMS and GEOS-Chem. Measurements from  
977 networks other than NOAA were corrected to the NOAA calibration scale, NOAA-2006A, using  
978 the results of the WMO Round Robin inter-comparison experiment  
979 (<https://www.esrl.noaa.gov/gmd/ccgg/wmorr/>), where available. For AGAGE and CSIRO, which  
980 did not participate in the WMO Round Robins, the data at sites where NOAA discrete samples are  
981 also collected were used to calculate a linear regression with NOAA data, which was applied to  
982 adjust the data to the NOAA-2006A scale. For the remaining CSIRO sites where there were no  
983 NOAA discrete samples, the mean regression coefficient and offset from all other CSIRO sites  
984 were used. The inversions used the discrete sample measurements without averaging, and hourly  
985 or daily means of the in-situ measurements, depending on the particular inversion framework.

986  
987 Each framework applied its own method for calculating the observation space uncertainty, the  
988 square of which gives the diagonal elements of the observation error covariance matrix R. The  
989 observation space uncertainty accounts for measurement and model representation errors and is  
990 equal to the quadratic sum of these terms. Typical values for the observation space uncertainty  
991 were between 0.3 and 0.5 ppb for all inversion frameworks.

992  
993 Prior mean emissions were based on estimates from terrestrial biosphere and ocean  
994 biogeochemistry models as well as from inventories. INVICAT, PyVAR-CAMS and GEOS-Chem  
995 used the same prior estimates for emissions from natural and agricultural soils from the model  
996 OCN v1.1 (*Zaehle et al.*, 2011) and for biomass burning emissions from GFEDv4.1s. For non-soil  
997 anthropogenic emissions (namely those from energy, industry and waste sectors), INVICAT,  
998 PyVAR-CAMS, and GEOS-Chem used EDGAR v5. MIROC4-ACTM used the VISIT model  
999 (*Inatomi et al.*, 2010; *Ito et al.*, 2018) for emissions from natural soils and EDGAR 4.2 for all  
1000 anthropogenic emissions, including agricultural waste burning, but did not explicitly include a  
1001 prior estimate for wildfire emissions.

1002  
1003 For the prior mean estimate of ocean fluxes, INVICAT, PyVAR-CAMS and GEOS-Chem used  
1004 the prognostic version of the PlankTOM-v10.2 model (*Buitenhuis et al.*, 2018) with a global total  
1005 source 2.5 TgN yr<sup>-1</sup>. Prior uncertainties were estimated in all the inversion frameworks for each  
1006 grid cell (INVICAT, PyVAR-CAMS and GEOS-Chem) or for each region (MIROC4-ACTM) and  
1007 the square of these uncertainties formed the diagonal elements of the prior error covariance matrix  
1008 **B**. INVICAT, PyVAR-CAMS and GEOS-Chem estimated the uncertainty as proportional to the  
1009 prior value in each grid cell, but MIROC4-ACTM set the uncertainty uniformly for land regions  
1010 at 1 Tg N yr<sup>-1</sup> and for ocean regions at 0.5 Tg N yr<sup>-1</sup>. INVICAT also included off-diagonal

1011 covariances in B corresponding to a spatial correlation between flux uncertainties of 500 km and  
1012 assumed a semi-exponential distribution of uncertainties so as to restrict the possibility of negative  
1013 fluxes.

1014  
1015

## 1016 **SI-12 Atmospheric N<sub>2</sub>O Observation Networks**

1017 The NOAA Network: For atmospheric N<sub>2</sub>O observations from the NOAA network (Dutton et al.  
1018 2023), we used global mean mixing ratios from the NOAA Global Monitoring Laboratory  
1019 (GML) (combined dataset based on measurements from five different measurement programs  
1020 [HATS old flask instrument, HATS current flask instrument (OTTO), the Carbon Cycle and  
1021 Greenhouse Gases (CCGG) group Cooperative Global Air Sampling Network  
1022 (<https://www.esrl.noaa.gov/gmd/ccgg/flask.php>), HATS in situ (RITS program), and HATS in  
1023 situ (CATS program)]. CCGG provides uncertainties with each measurement (see site files:  
1024 [ftp://aftp.cmdl.noaa.gov/data/greenhouse\\_gases/n2o/flask/surface/](ftp://aftp.cmdl.noaa.gov/data/greenhouse_gases/n2o/flask/surface/)). The CCGG measurements  
1025 for N<sub>2</sub>O analysis from more than 50 sites globally was changed to tunable infrared laser direct  
1026 absorption spectroscopy (TILDAS) in mid-2019 from gas chromatography. About 40 sites of  
1027 them (mostly Marine Boundary Layer sites) are used to calculate CCGG monthly mean global  
1028 N<sub>2</sub>O levels. Monthly mean observations from different NOAA measurement programs are  
1029 statistically combined to create a long-term NOAA/ESRL GML dataset. Uncertainties (1 sigma)  
1030 associated with monthly estimates of global mean N<sub>2</sub>O, are ~1 ppb from 1977–1987, 0.6 ppb  
1031 from 1988–1994, 0.3–0.4 ppb from 1995–2000, and 0.1 ppb from 2001–2017. NOAA data are  
1032 generally more consistent after 1995, with standard deviations on the monthly mean mixing  
1033 ratios at individual sites of ~0.5 ppb from 1995–1998, and 0.1–0.4 ppb after 1998. A detailed  
1034 description of these measurement programs and the method to combine them are available via  
1035 <https://www.esrl.noaa.gov/gmd/hats/combined/N2O.html>.

1036 **THE AGAGE network:** The Advanced Global Atmospheric Gases Experiment (AGAGE) global  
1037 network (and its predecessors ALE and GAGE) (Prinn et al., 2018) has made continuous high-  
1038 frequency gas chromatographic (GC) measurements with electronic capture detection (ECD)  
1039 of N<sub>2</sub>O at five globally distributed sites since 1978. Improved GC/ECD methods have been  
1040 deployed over time resulting in N<sub>2</sub>O measurement precision of about 0.35% in ALE, 0.13% in  
1041 GAGE (Prinn et al., 1990) and 0.05% in AGAGE (Prinn et al., 2008; 2018). We used the global  
1042 mean of AGAGE N<sub>2</sub>O measurements during 1980–2020 which are reported on the Scripps  
1043 Institution of Oceanography SIO-16 scale. Further information on AGAGE stations, instruments,  
1044 calibration, uncertainties and access to data is available at the AGAGE Data website:  
1045 <https://www.osti.gov/dataexplorer/biblio/dataset/1841748>.

1046  
1047 **The CSIRO network:** The CSIRO flask network (Francey et al., 2003) consists of nine sampling  
1048 sites distributed globally and has been in operation since 1992. Flask samples are collected  
1049 approximately every two weeks and shipped back to CSIRO GASLAB for analysis. Samples  
1050 were analyzed by gas chromatography with electron capture detection (GC-ECD). One  
1051 Shimadzu gas chromatograph labelled “Shimadzu-1” (S1) has been used over the entire length of  
1052 the record and the measurement precision for N<sub>2</sub>O from this instrument is about 0.1%. N<sub>2</sub>O data  
1053 from the CSIRO global flask network are reported on the NOAA-2006A N<sub>2</sub>O scale and are  
1054 archived at the World Data Centre for Greenhouse Gases (WDCGG: <https://gaw.kishou.go.jp/>).  
1055 Nine sites from the CSIRO network were used to calculate the annual global N<sub>2</sub>O mole fractions.  
1056 Smooth curve fits to the N<sub>2</sub>O data from each of these sites were calculated using the technique

1057 outlined in Thoning et al. (1989), using a short-term cut-off of 80 days. The smooth curve fit data  
1058 were then placed on an evenly spaced latitude (5 degree) versus time (weekly) grid using the  
1059 Kriging interpolation technique. Finally, the gridded data were used to calculate the global  
1060 annual values.

1061  
1062

1063 **References:**

1064

1065 Adalibieke, W., Cui X.Q., Cai H.W., You L.Z., and Zhou F.: Global crop-specific nitrogen  
1066 fertilization dataset in 1961-2020, *Scientific Data* 10, 617,  
1067 2023, <https://www.nature.com/articles/s41597-023-02526-z>

1068 Asaadi, A., and Arora, V. K.: Implementation of nitrogen cycle in the CLASSIC land model,  
1069 *Biogeosciences*, 18(2), 669-706, 2021.

1070 Aumont, O., Éthé, C., Tagliabue, A., Bopp, L., and Gehlen, M.: PISCES-v2: an ocean  
1071 biogeochemical model for carbon and ecosystem studies, *Geoscientific Model Development*  
1072 *Discussions*, 8(2), 1375-1509, 2015.

1073 Battaglia, G., and Joos, F.: Marine N<sub>2</sub>O emissions from nitrification and denitrification  
1074 constrained by modern observations and projected in multimillennial global warming simulations,  
1075 *Global Biogeochemical Cycles*, 32(1), 92-121, 2018.

1076 Beaulieu, J. J., Tank, J. L., Hamilton, S. K., Wollheim, W. M., Hall Jr, R. O., Mulholland, P. J.,  
1077 Peterson, B. J., Ashkenas, L. R., Cooper, L. W., and Dahm, C. N. : Nitrous oxide emission from  
1078 denitrification in stream and river networks, *Proceedings of the National Academy of Sciences*,  
1079 108(1), 214-219, 2011.

1080 Berdanier, A. B., and Conant, R. T.: Regionally differentiated estimates of cropland N<sub>2</sub>O  
1081 emissions reduce uncertainty in global calculations, *Global Change Biology*, 18(3), 928-935, 2012.

1082 Berthet, S., Jouanno, J., Séférian, R., Gehlen, M., and Llovel, W.: How does the phytoplankton–  
1083 light feedback affect the marine N<sub>2</sub>O inventory?, *Earth System Dynamics*, 14(2), 399-412, 2023.

1084 Berthet, S., Séférian, R., Bricaud, C., Chevallier, M., Voltaire, A., and Ethé, C.: Evaluation of an  
1085 online grid-coarsening algorithm in a global eddy-admitting ocean biogeochemical model, *Journal*  
1086 *of Advances in Modeling Earth Systems*, 11(6), 1759-1783, 2019.

1087 Bouwman, A. F., Beusen, A. H. W., and Billen, G. : Human alteration of the global nitrogen and  
1088 phosphorus soil balances for the period 1970–2050, *Global Biogeochemical Cycles*, 23(4), 2009.

1089 Bouwman, A. F., Beusen, A. H. W., Overbeek, C. C., Bureau, D. P., Pawłowski, M., and Glibert,  
1090 P. M.: Hindcasts and future projections of global inland and coastal nitrogen and phosphorus loads  
1091 due to finfish aquaculture, *Reviews in Fisheries Science*, 21(2), 112-156, 2013.

1092 Bouwman, A. F., Pawłowski, M., Liu, C., Beusen, A. H. W., Shumway, S. E., Glibert, P. M., and  
1093 Overbeek, C. C.: Global hindcasts and future projections of coastal nitrogen and phosphorus loads  
1094 due to shellfish and seaweed aquaculture, *Reviews in Fisheries Science*, 19(4), 331-357, 2011.

- 1095 Buendia, E., Tanabe, K., Kranjc, A., Baasansuren, J., Fukuda, M., Ngarize, S., Osako, A.,  
1096 Pyrozhenko, Y., Shermanau, P., and Federici, S.: 2019 Refinement to the 2006 IPCC Guidelines  
1097 for National Greenhouse Gas Inventories *Rep.*, 2019.
- 1098 Buitenhuis, E. T., Suntharalingam, P., and Le Quéré, C.: Constraints on global oceanic emissions  
1099 of N<sub>2</sub>O from observations and models, *Biogeosciences*, 15(7), 2161-2175, 2018.
- 1100 Carroll, D., Menemenlis, D., Adkins, J. F., Bowman, K. W., Brix, H., Dutkiewicz, S., Fenty, I.,  
1101 Gierach, M. M., Hill, C., and Jahn, O.: The ECCO-Darwin data-assimilative global ocean  
1102 biogeochemistry model: Estimates of seasonal to multidecadal surface ocean pCO<sub>2</sub> and air-sea  
1103 CO<sub>2</sub> flux, *Journal of Advances in Modeling Earth Systems*, 12(10), e2019MS001888, 2020.
- 1104 Chatskikh, D., Olesen, J. E., Berntsen, J., Regina, K., and Yamulki, S.: Simulation of effects of  
1105 soils, climate and management on N<sub>2</sub>O emission from grasslands, *Biogeochemistry*, 76, 395-419,  
1106 2005.
- 1107 Crippa, M., Solazzo, E., Guizzardi, D., Monforti-Ferrario, F., Tubiello, F. N., and Leip, A.: Food  
1108 systems are responsible for a third of global anthropogenic GHG emissions, *Nature Food*, 2(3),  
1109 198-209, 2021.
- 1110 Crippa, M., Solazzo, E., Guizzardi, D., Van Dingenen, R., and Leip, A.: Air pollutant emissions  
1111 from global food systems are responsible for environmental impacts, crop losses and mortality,  
1112 *Nature Food*, 1-15, 2022.
- 1113 Cui, X., Zhou, F., Ciais, P., Davidson, E. A., Tubiello, F. N., Niu, X., Ju, X., Canadell, J. G.,  
1114 Bouwman, A. F., and Jackson, R. B.: Global mapping of crop-specific emission factors highlights  
1115 hotspots of nitrous oxide mitigation, *Nature Food*, 2(11), 886-893, 2021.
- 1116 Davidson, E. A., de Carvalho, C. J. R., Figueira, A. M., Ishida, F. Y., Ometto, J. P. H. B., Nardoto,  
1117 G. B., Sabá, R. T., Hayashi, S. N., Leal, E. C., and Vieira, I. C. G.: Recuperation of nitrogen cycling  
1118 in Amazonian forests following agricultural abandonment, *Nature*, 447(7147), 995-998, 2007.
- 1119 Davidson, E. A., Keller, M., Erickson, H. E., Verchot, L. V., and Veldkamp, E.: Testing a  
1120 conceptual model of soil emissions of nitrous and nitric oxides: using two functions based on soil  
1121 nitrogen availability and soil water content, the hole-in-the-pipe model characterizes a large  
1122 fraction of the observed variation of nitric oxide and nitrous oxide emissions from soils,  
1123 *Bioscience*, 50(8), 667-680, 2000.
- 1124 Decock, C.: Mitigating nitrous oxide emissions from corn cropping systems in the midwestern US:  
1125 Potential and data gaps, *Environmental Science & Technology*, 48(8), 4247-4256, 2014.
- 1126 Deemer, B. R., Harrison, J. A., Li, S., Beaulieu, J. J., DelSontro, T., Barros, N., Bezerra-Neto, J.  
1127 F., Powers, S. M., Dos Santos, M. A., and Vonk, J. A.: Greenhouse gas emissions from reservoir  
1128 water surfaces: a new global synthesis, *BioScience*, 66(11), 949-964, 2016.
- 1129 Del Grosso, S. J., Parton, W. J., Mosier, A. R., Ojima, D. S., Kulmala, A. E., and Phongpan, S.:  
1130 General model for N<sub>2</sub>O and N<sub>2</sub> gas emissions from soils due to denitrification, *Global  
1131 biogeochemical cycles*, 14(4), 1045-1060, 2000.
- 1132 Döll, P., and Lehner, B.: Validation of a new global 30-min drainage direction map, *Journal of  
1133 Hydrology*, 258(1-4), 214-231, 2002.

- 1134 Dürr, H. H., Laruelle, G. G., van Kempen, C. M., Slomp, C. P., Meybeck, M., and Middelkoop,  
1135 H.: Worldwide typology of nearshore coastal systems: defining the estuarine filter of river inputs  
1136 to the oceans, *Estuaries Coasts*, 34, 441-458, 2011.
- 1137 Eggleston, H. S., Buendia, L., Miwa, K., Ngara, T., and Tanabe, K. : 2006 IPCC guidelines for  
1138 national greenhouse gas inventories, 2006.
- 1139 FAO (2020), FAO Fisheries and Aquaculture - FishStatJ - Software for Fishery and Aquaculture  
1140 Statistical Time Series. In: FAO Fisheries and Aquaculture Division [online]. Rome. [Cited 3  
1141 November 2021]. , edited.
- 1142 FAO (2022), FAOSTAT Climate Change, Emissions, Emissions Totals, edited.
- 1143 Ganesan, A. L., Manizza, M., Morgan, E. J., Harth, C. M., Kozlova, E., Lueker, T., Manning, A.  
1144 J., Lunt, M. F., Mühle, J., and Lavric, J. V.: Marine nitrous oxide emissions from three Eastern  
1145 Boundary Upwelling Systems inferred from atmospheric observations, *Geophysical Research  
1146 Letters*, 47(14), e2020GL087822, 2020.
- 1147 Goldewijk, K. K., Beusen, A., Doelman, J., and Stehfest, E.: Anthropogenic land use estimates for  
1148 the Holocene–HYDE 3.2, *Earth System Science Data*, 9(2), 927-953, 2017.
- 1149 Hall, B. D., Dutton, G. S., and Elkins, J. W.: The NOAA nitrous oxide standard scale for  
1150 atmospheric observations, *Journal of Geophysical Research: Atmospheres*, 112(D9), 2007.
- 1151 Harris, I. P. D. J., Jones, P. D., Osborn, T. J., and Lister, D. H.: Updated high-resolution grids of  
1152 monthly climatic observations–the CRU TS3. 10 Dataset, *International journal of climatology*,  
1153 34(3), 623-642, 2014.
- 1154 Heinen, M.: Simplified denitrification models: overview and properties, *Geoderma*, 133(3-4), 444-  
1155 463, 2006.
- 1156 Helgason, B. L., Janzen, H. H., Chantigny, M. H., Drury, C. F., Ellert, B. H., Gregorich, E. G.,  
1157 Lemke, R. L., Pattey, E., Rochette, P., and Wagner-Riddle, C.: Toward improved coefficients for  
1158 predicting direct N<sub>2</sub>O emissions from soil in Canadian agroecosystems, *Nutrient Cycling in  
1159 Agroecosystems*, 72, 87-99, 2005.
- 1160 Hénault, C., Bizouard, F., Laville, P., Gabrielle, B., Nicoullaud, B., Germon, J. C., and Cellier, P.:  
1161 Predicting in situ soil N<sub>2</sub>O emission using NOE algorithm and soil database, *Global Change  
1162 Biology*, 11(1), 115-127, 2005.
- 1163 Hersbach, H., Bell, B., Berrisford, P., Hirahara, S., Horányi, A., Muñoz-Sabater, J., Nicolas, J.,  
1164 Peubey, C., Radu, R., and Schepers, D.: Complete ERA5 from 1979: Fifth generation of ECMWF  
1165 atmospheric reanalyses of the global climate, *Copernicus Climate Change Service Data Store*,  
1166 2017.
- 1167 Hickman, J. E., Scholes, R. J., Rosenstock, T. S., Garcia-Pando, C. P., and Nyamangara, J.:  
1168 Assessing non-CO<sub>2</sub> climate-forcing emissions and mitigation in sub-Saharan Africa, *Current  
1169 Opinion in Environmental Sustainability*, 9, 65-72, 2014.
- 1170 Hu, M., Chen, D., and Dahlgren, R. A.: Modeling nitrous oxide emission from rivers: a global  
1171 assessment, *Global Change Biology*, 22(11), 3566-3582, 2016.
- 1172 Huang, Y., and Gerber, S.: Global soil nitrous oxide emissions in a dynamic carbon-nitrogen  
1173 model, *Biogeosciences*, 12(21), 6405-6427, 2015.

1174 Hurtt, G. C., Chini, L., Sahajpal, R., Frohling, S., Bodirsky, B. L., Calvin, K., Doelman, J. C., Fisk,  
1175 J., Fujimori, S., and Klein Goldewijk, K.: Harmonization of global land use change and  
1176 management for the period 850–2100 (LUH2) for CMIP6, *Geoscientific Model Development*,  
1177 *13*(11), 5425-5464, 2020.

1178 IEA: World Energy Outlook 2021*Rep.*, IEA, Paris, 2021.

1179 Inatomi, M., Ito, A., Ishijima, K., and Murayama, S.: Greenhouse gas budget of a cool-temperate  
1180 deciduous broad-leaved forest in Japan estimated using a process-based model, *Ecosystems*, *13*,  
1181 472-483, 2010.

1182 IPCC: Revised 1996 IPCC Guidelines for National Greenhouse Gas Inventories, 1996.

1183 IPCC: Good practice guidance and uncertainty management in national greenhouse gas  
1184 inventories, 2000.

1185 IPCC: IPCC Guidelines for National Greenhouse Gas Inventories*Rep.*, Hayama, Japan, 2006.

1186 Ito, A., Nishina, K., Ishijima, K., Hashimoto, S., and Inatomi, M.: Emissions of nitrous oxide (N  
1187 2 O) from soil surfaces and their historical changes in East Asia: a model-based assessment,  
1188 *Progress in Earth Planetary Science*, *5*, 1-13, 2018.

1189 Janssens-Maenhout, G., Crippa, M., Guizzardi, D., Muntean, M., Schaaf, E., Dentener, F.,  
1190 Bergamaschi, P., Pagliari, V., Olivier, J. G., and Peters, J. A.: EDGAR v4. 3.2 Global Atlas of the  
1191 three major greenhouse gas emissions for the period 1970–2012, *Earth System Science Data*,  
1192 *11*(3), 959-1002, 2019.

1193 Jin, X., and Gruber, N.: Offsetting the radiative benefit of ocean iron fertilization by enhancing  
1194 N<sub>2</sub>O emissions, *Geophysical research letters*, *30*(24), 2003.

1195 Johnson, D. J., Niedbalski, N. P., Ervin, J. S., and Patnaik, S. S.: Ammonium carbamate-based  
1196 heat exchanger reactor as an endothermic heat sink for thermal management, *International Journal*  
1197 *of Heat Mass Transfer*, *91*, 766-776, 2015.

1198 Kalnay, E., Kanamitsu, M., Kistler, R., Collins, W., Deaven, D., Gandin, L., Iredell, M., Saha, S.,  
1199 White, G., and Woollen, J.: The NCEP/NCAR 40-year reanalysis project, *Bulletin of the American*  
1200 *meteorological Society*, *77*(3), 437-472, 1996.

1201 Keller, M., and Reiners, W. A.: Soil-atmosphere exchange of nitrous oxide, nitric oxide, and  
1202 methane under secondary succession of pasture to forest in the Atlantic lowlands of Costa Rica,  
1203 *Global Biogeochemical Cycles*, *8*(4), 399-409, 1994.

1204 Kim, D.-G., Giltrap, D., and Hernandez-Ramirez, G.: Background nitrous oxide emissions in  
1205 agricultural and natural lands: a meta-analysis, *Plant Soil*, *373*, 17-30, 2013a.

1206 Kim, D.-G., Hernandez-Ramirez, G., and Giltrap, D.: Linear and nonlinear dependency of direct  
1207 nitrous oxide emissions on fertilizer nitrogen input: A meta-analysis, *Agriculture, Ecosystems*  
1208 *Environment*, *168*, 53-65, 2013b.

1209 Kock, A., and Bange, H. W.: Counting the ocean's greenhouse gas emissions, *Eos: Earth Space*  
1210 *Science News*, *96*(3), 10-13, 2015.

1211 Kou Giesbrecht, S., and Arora, V. K.: Representing the dynamic response of vegetation to nitrogen  
1212 limitation via biological nitrogen fixation in the CLASSIC Land Model, *Global Biogeochemical*  
1213 *Cycles*, *36*(6), e2022GB007341, 2022.

- 1214 Landolfi, A., Somes, C. J., Koeve, W., Zamora, L. M., and Oeschler, A.: Oceanic nitrogen cycling  
1215 and N<sub>2</sub>O flux perturbations in the Anthropocene, *Global Biogeochemical Cycles*, 31(8), 1236-  
1216 1255, 2017.
- 1217 Laruelle, G. G., Landschützer, P., Gruber, N., Tison, J.-L., Delille, B., and Regnier, P.: Global  
1218 high-resolution monthly pCO<sub>2</sub> climatology for the coastal ocean derived from neural network  
1219 interpolation, *Biogeosciences*, 14(19), 4545-4561, 2017.
- 1220 Lauerwald, R., Regnier, P., Figueiredo, V., Enrich-Prast, A., Bastviken, D., Lehner, B., Maavara,  
1221 T., and Raymond, P.: Natural lakes are a minor global source of N<sub>2</sub>O to the atmosphere, *Global*  
1222 *Biogeochemical Cycles*, 33(12), 1564-1581, 2019.
- 1223 Le Quéré, C., Buitenhuis, E. T., Moriarty, R., Alvain, S., Aumont, O., Bopp, L., Chollet, S.,  
1224 Enright, C., Franklin, D. J., and Geider, R. J.: Role of zooplankton dynamics for Southern Ocean  
1225 phytoplankton biomass and global biogeochemical cycles, *Biogeosciences*, 13(14), 4111-4133,  
1226 2016.
- 1227 Lehner, B., Liermann, C. R., Revenga, C., Vörösmarty, C., Fekete, B., Crouzet, P., Döll, P.,  
1228 Endejan, M., Frenken, K., and Magome, J. : High-resolution mapping of the world's reservoirs and  
1229 dams for sustainable river-flow management, *Frontiers in Ecology the Environment*, 9(9), 494-  
1230 502, 2011.
- 1231 Lehner, B., Verdin, K., and Jarvis, A.: New global hydrography derived from spaceborne elevation  
1232 data, *Eos, Transactions American Geophysical Union*, 89(10), 93-94, 2008.
- 1233 Lehuger, S., Gabrielle, B., Laville, P., Lamboni, M., Loubet, B., and Cellier, P.: Predicting and  
1234 mitigating the net greenhouse gas emissions of crop rotations in Western Europe, *Agricultural*  
1235 *Forest Meteorology*, 151(12), 1654-1671, 2011.
- 1236 Leppelt, T., Dechow, R., Gebbert, S., Freibauer, A., Lohila, A., Augustin, J., Drösler, M., Fiedler,  
1237 S., Glatzel, S., and Höper, H.: Nitrous oxide emission budgets and land-use-driven hotspots for  
1238 organic soils in Europe, *Biogeosciences*, 11(23), 6595-6612, 2014.
- 1239 Lan, X., E.J. Dlugokencky, J.W. Mund, A.M. Crotwell, M.J. Crotwell, E. Moglia, M. Madronich,  
1240 D. Neff and K.W. Thoning (2022), Atmospheric Nitrous Oxide Dry Air  
1241 Mole Fractions from the NOAA GML Carbon Cycle Cooperative Global Air Sampling Network,  
1242 1997-2021, Version: 2022-11-21, <https://doi.org/10.15138/53g1-x417>
- 1243 Li, C., Aber, J., Stange, F., Butterbach-Bahl, K., and Papen, H.: A process-oriented model of N<sub>2</sub>O  
1244 and NO emissions from forest soils: 1. Model development, *Journal of Geophysical Research:*  
1245 *Atmospheres*, 105(D4), 4369-4384, 2000.
- 1246 Li, C., Frolking, S., and Frolking, T. A.: A model of nitrous oxide evolution from soil driven by  
1247 rainfall events: 2. Model applications, *Journal of Geophysical Research: Atmospheres*, 97(D9),  
1248 9777-9783, 1992.
- 1249 Liang, J. H., Deutsch, C., McWilliams, J. C., Baschek, B., Sullivan, P. P., and Chiba, D.:  
1250 Parameterizing bubble-mediated air-sea gas exchange and its effect on ocean ventilation, *Global*  
1251 *Biogeochemical Cycles*, 27(3), 894-905, 2013.
- 1252 Lu, C., and Tian, H.: Net greenhouse gas balance in response to nitrogen enrichment: perspectives  
1253 from a coupled biogeochemical model, *Global Change Biology*, 19(2), 571-588, 2013.

- 1254 Maavara, T., Lauerwald, R., Laruelle, G. G., Akbarzadeh, Z., Bouskill, N. J., Van Cappellen, P.,  
 1255 and Regnier, P.: Nitrous oxide emissions from inland waters: Are IPCC estimates too high?,  
 1256 *Global Change Biology*, 25(2), 473-488, 2019.
- 1257 Madec, G.: NEMO ocean engine: Note du pole de modélisation, Institut Pierre-Simon Laplace  
 1258 (IPSL), France, No 27 ISSN No 1288-1619, *France: IPSL*, 2008.
- 1259 Madec, G., Bourdallé-Badie, R., Bouttier, P.-A., Bricaud, C., Bruciaferri, D., Calvert, D., Chanut,  
 1260 J., Clementi, E., Coward, A., and Delrosso, D.: NEMO ocean engine, 2017.
- 1261 Manizza, M., Keeling, R. F., and Nevison, C. D.: On the processes controlling the seasonal cycles  
 1262 of the air–sea fluxes of O<sub>2</sub> and N<sub>2</sub>O: A modelling study, *Tellus B: Chemical Physical*  
 1263 *Meteorology*, 64(1), 18429, 2012.
- 1264 Manizza, M., Menemenlis, D., Zhang, H., and Miller, C. E.: Modeling the recent changes in the  
 1265 Arctic Ocean CO<sub>2</sub> sink (2006–2013), *Global Biogeochemical Cycles*, 33(3), 420-438, 2019.
- 1266 Martinez-Rey, J., Bopp, L., Gehlen, M., Tagliabue, A., and Gruber, N.: Projections of oceanic  
 1267 N<sub>2</sub>O emissions in the 21st century using the IPSL Earth system model, *Biogeosciences*, 12(13),  
 1268 4133-4148, 2015.
- 1269 Marzadri, A., Amatulli, G., Tonina, D., Bellin, A., Shen, L. Q., Allen, G. H., and Raymond, P. A.:  
 1270 Global riverine nitrous oxide emissions: The role of small streams and large rivers, *Science of The*  
 1271 *Total Environment*, 776, 145148, 2021.
- 1272 Marzadri, A., Dee, M. M., Tonina, D., Bellin, A., and Tank, J. L.: Role of surface and subsurface  
 1273 processes in scaling N<sub>2</sub>O emissions along riverine networks, *Proceedings of the National Academy*  
 1274 *of Sciences*, 114(17), 4330-4335, 2017.
- 1275 McCrackin, M. L., Harrison, J. A., and Compton, J. E.: Factors influencing export of dissolved  
 1276 inorganic nitrogen by major rivers: A new, seasonal, spatially explicit, global model, *Global*  
 1277 *Biogeochemical Cycles*, 28(3), 269-285, 2014.
- 1278 Melillo, J. M., Steudler, P. A., Feigl, B. J., Neill, C., Garcia, D., Piccolo, M. C., Cerri, C. C., and  
 1279 Tian, H.: Nitrous oxide emissions from forests and pastures of various ages in the Brazilian  
 1280 Amazon, *Journal of Geophysical Research: Atmospheres*, 106(D24), 34179-34188, 2001.
- 1281 Messenger, M. L., Lehner, B., Grill, G., Nedeva, I., and Schmitt, O.: Estimating the volume and age  
 1282 of water stored in global lakes using a geo-statistical approach, *Nature Communications*, 7(1),  
 1283 13603, 2016.
- 1284 Nevison, C., Butler, J. H., and Elkins, J. W.: Global distribution of N<sub>2</sub>O and the ΔN<sub>2</sub>O-AOU yield  
 1285 in the subsurface ocean, *Global Biogeochemical Cycles*, 17(4), 2003.
- 1286 Pan, S., Bian, Z., Tian, H., Yao, Y., Najjar, R. G., Friedrichs, M. A. M., Hofmann, E. E., Xu, R.,  
 1287 and Zhang, B.: Impacts of multiple environmental changes on long-term nitrogen loading from the  
 1288 Chesapeake Bay watershed, *Journal of Geophysical Research: Biogeosciences*, 126(5),  
 1289 e2020JG005826, 2021.
- 1290 Parekh, P., Joos, F., and Müller, S. A.: A modeling assessment of the interplay between aeolian  
 1291 iron fluxes and iron-binding ligands in controlling carbon dioxide fluctuations during Antarctic  
 1292 warm events, *Paleoceanography*, 23(4), 2008.



1293 Parton, W. J., Mosier, A. R., Ojima, D. S., Valentine, D. W., Schimel, D. S., Weier, K., and  
1294 Kulmala, A. E.: Generalized model for N<sub>2</sub> and N<sub>2</sub>O production from nitrification and  
1295 denitrification, *Global biogeochemical cycles*, 10(3), 401-412, 1996.

1296 Patra, P. K., Dlugokencky, E. J., Elkins, J. W., Dutton, G. S., Tohjima, Y., Sasakawa, M., Ito, A.,  
1297 Weiss, R. F., Manizza, M., and Krummel, P. B.: Forward and inverse modelling of atmospheric  
1298 nitrous oxide using MIROC4-atmospheric chemistry-transport model, *Journal of the*  
1299 *Meteorological Society of Japan. Ser. II*, 100(2), 361-386, 2022.

1300 Patra, P. K., Takigawa, M., Watanabe, S., Chandra, N., Ishijima, K., and Yamashita, Y.: Improved  
1301 chemical tracer simulation by MIROC4. 0-based atmospheric chemistry-transport model  
1302 (MIROC4-ACTM), *Sola*, 14, 91-96, 2018.

1303 Paulot, F., Jacob, D. J., Johnson, M. T., Bell, T. G., Baker, A. R., Keene, W. C., Lima, I. D., Doney,  
1304 S. C., and Stock, C. A.: Global oceanic emission of ammonia: Constraints from seawater and  
1305 atmospheric observations, *Global Biogeochemical Cycles*, 29(8), 1165-1178, 2015.

1306 Peltier, W. R.: Global glacial isostasy and the surface of the ice-age Earth: the ICE-5G (VM2)  
1307 model and GRACE, *Annual Review of Earth and Planetary Sciences*, 32, 111-149, 2004.

1308 Portmann, F. T., Siebert, S., and Döll, P.: MIRCA2000—Global monthly irrigated and rainfed  
1309 crop areas around the year 2000: A new high-resolution data set for agricultural and hydrological  
1310 modeling, *Global Biogeochemical Cycles*, 24(1), 2010.

1311 Porwollik, V., Rolinski, S., Heinke, J., and Müller, C.: Generating a rule-based global gridded  
1312 tillage dataset, *Earth System Science Data*, 11(2), 823-843, 2019.

1313 Prather, M. J., Hsu, J., DeLuca, N. M., Jackman, C. H., Oman, L. D., Douglass, A. R., Fleming,  
1314 E. L., Strahan, S. E., Steenrod, S. D., and Søvde, O. A.: Measuring and modeling the lifetime of  
1315 nitrous oxide including its variability, *Journal of Geophysical Research: Atmospheres*, 120(11),  
1316 5693-5705, 2015.

1317 Rochette, P., and Janzen, H. H.: Towards a revised coefficient for estimating N<sub>2</sub>O emissions from  
1318 legumes, *Nutrient Cycling in Agroecosystems*, 73, 171-179, 2005.

1319 Rosentreter, J. A., Laruelle, G. G., Bange, H. W., Bianchi, T. S., Busecke, J. J. M., Cai, W.-J.,  
1320 Eyre, B. D., Forbrich, I., Kwon, E. Y., and Maavara, T.: Coastal vegetation and estuaries are  
1321 collectively a greenhouse gas sink, *Nature Climate Change*, 1-9, 2023.

1322 Sacks, W. J., Deryng, D., Foley, J. A., and Ramankutty, N.: Crop planting dates: an analysis of  
1323 global patterns, *Global Ecology Biogeography*, 19(5), 607-620, 2010.

1324 Salas y Mélia, D.: A global coupled sea ice–ocean model, *Ocean Modelling*, 4(2), 137-172, 2002.

1325 Séférian, R., Nabat, P., Michou, M., Saint-Martin, D., Voldoire, A., Colin, J., Decharme, B.,  
1326 Delire, C., Berthet, S., and Chevallier, M.: Evaluation of CNRM Earth System Model, CNRM-  
1327 ESM2-1: role of Earth system processes in present-day and future climate, *Journal of Advances in*  
1328 *Modeling Earth Systems*, 11(12), 4182-4227, 2019.

1329 Shangguan, W., Dai, Y., Duan, Q., Liu, B., and Yuan, H.: A global soil data set for earth system  
1330 modeling, *Journal of Advances in Modeling Earth Systems*, 6(1), 249-263, 2014.

- 1331 Shcherbak, I., Millar, N., and Robertson, G. P.: Global metaanalysis of the nonlinear response of  
 1332 soil nitrous oxide (N<sub>2</sub>O) emissions to fertilizer nitrogen, *Proceedings of the National Academy of*  
 1333 *Sciences*, *111*(25), 9199-9204, 2014.
- 1334 Shu, S., Jain, A. K., Koven, C. D., and Mishra, U.: Estimation of permafrost SOC stock and  
 1335 turnover time using a land surface model with vertical heterogeneity of permafrost soils, *Global*  
 1336 *Biogeochemical Cycles*, *34*(11), e2020GB006585, 2020.
- 1337 Solazzo, E., Crippa, M., Guizzardi, D., Muntean, M., Choulga, M., and Janssens-Maenhout, G.:  
 1338 Uncertainties in the Emissions Database for Global Atmospheric Research (EDGAR) emission  
 1339 inventory of greenhouse gases, *Atmospheric Chemistry Physics*, *21*(7), 5655-5683, 2021.
- 1340 Stehfest, E., and Bouwman, L.: N<sub>2</sub>O and NO emission from agricultural fields and soils under  
 1341 natural vegetation: summarizing available measurement data and modeling of global annual  
 1342 emissions, *Nutrient cycling in agroecosystems*, *74*, 207-228, 2006.
- 1343 Sullivan, B. W., Nifong, R. L., Nasto, M. K., Alvarez-Clare, S., Dencker, C. M., Soper, F. M.,  
 1344 Shoemaker, K. T., Ishida, F. Y., Zaragoza-Castells, J., and Davidson, E. A.: Biogeochemical  
 1345 recuperation of lowland tropical forest during succession, *Ecology*, *100*(4), e02641, 2019.
- 1346 Tarantola, A.: *Inverse problem theory and methods for model parameter estimation*, SIAM, 2005.
- 1347 Thompson, R. L., Chevallier, F., Crotwell, A. M., Dutton, G., Langenfelds, R. L., Prinn, R. G.,  
 1348 Weiss, R. F., Tohjima, Y., Nakazawa, T., and Krummel, P. B.: Nitrous oxide emissions 1999 to  
 1349 2009 from a global atmospheric inversion, *Atmospheric Chemistry Physics*, *14*(4), 1801-1817,  
 1350 2014.
- 1351 Thornton, P. E., and Rosenbloom, N. A. : Ecosystem model spin-up: Estimating steady state  
 1352 conditions in a coupled terrestrial carbon and nitrogen cycle model, *Ecological Modelling*, *189*(1-  
 1353 2), 25-48, 2005.
- 1354 Tian, H., Bian, Z., Shi, H., Qin, X., Pan, N., Lu, C., Pan, S., Tubiello, F. N., Chang, J., and  
 1355 Conchedda, G.: History of anthropogenic Nitrogen inputs (HaNi) to the terrestrial biosphere: a 5  
 1356 arcmin resolution annual dataset from 1860 to 2019, *Earth System Science Data*, *14*(10), 4551-  
 1357 4568, 2022.
- 1358 Tian, H., Chen, G., Zhang, C., Liu, M., Sun, G., Chappelka, A., Ren, W., Xu, X., Lu, C., and Pan,  
 1359 S.: Century-scale responses of ecosystem carbon storage and flux to multiple environmental  
 1360 changes in the southern United States, *Ecosystems*, *15*, 674-694, 2012a.
- 1361 Tian, H., Lu, C., Chen, G., Tao, B., Pan, S., Grosso, S. J. D., Xu, X., Bruhwiler, L., Wofsy, S. C.,  
 1362 and Kort, E. A.: Contemporary and projected biogenic fluxes of methane and nitrous oxide in  
 1363 North American terrestrial ecosystems, *Frontiers in Ecology the Environment*, *10*(10), 528-536,  
 1364 2012b.
- 1365 Tian, H., Ren, W., Yang, J., Tao, B., Cai, W. J., Lohrenz, S. E., Hopkinson, C. S., Liu, M., Yang,  
 1366 Q., and Lu, C. : Climate extremes dominating seasonal and interannual variations in carbon export  
 1367 from the Mississippi River Basin, *Global Biogeochemical Cycles*, *29*(9), 1333-1347, 2015.
- 1368 Tian, H., Xu, R., Canadell, J. G., Thompson, R. L., Winiwarer, W., Suntharalingam, P., Davidson,  
 1369 E. A., Ciais, P., Jackson, R. B., Janssens-Maenhout, G., ..., and Yuanzhi, Y.: A comprehensive  
 1370 quantification of global nitrous oxide sources and sinks, *Nature*, *586*(7828), 248-256, 2020a.

- 1371 Tian, H., Xu, R., Pan, S., Yao, Y., Bian, Z., Cai, W. J., Hopkinson, C. S., Justic, D., Lohrenz, S.,  
1372 and Lu, C.: Long-term trajectory of nitrogen loading and delivery from Mississippi River Basin to  
1373 the Gulf of Mexico, *Global Biogeochemical Cycles*, 34(5), e2019GB006475, 2020b.
- 1374 Tian, H., Xu, X., Liu, M., Ren, W., Zhang, C., Chen, G., and Lu, C.: Spatial and temporal patterns  
1375 of CH<sub>4</sub> and N<sub>2</sub>O fluxes in terrestrial ecosystems of North America during 1979–2008: application  
1376 of a global biogeochemistry model, *Biogeosciences*, 7(9), 2673-2694, 2010.
- 1377 Tian, H., Xu, X., Lu, C., Liu, M., Ren, W., Chen, G., Melillo, J., and Liu, J.: Net exchanges of  
1378 CO<sub>2</sub>, CH<sub>4</sub>, and N<sub>2</sub>O between China's terrestrial ecosystems and the atmosphere and their  
1379 contributions to global climate warming, *Journal of Geophysical Research: Biogeosciences*,  
1380 116(G2), 2011.
- 1381 Tian, H., Yang, J., Lu, C., Xu, R., Canadell, J. G., Jackson, R. B., Arneeth, A., Chang, J., Chen, G.,  
1382 and Ciais, P.: The global N<sub>2</sub>O model intercomparison project, *Bulletin of the American*  
1383 *Meteorological Society*, 99(6), 1231-1251, 2018.
- 1384 Tschumi, T., Joos, F., Gehlen, M., and Heinze, C.: Deep ocean ventilation, carbon isotopes, marine  
1385 sedimentation and the deglacial CO<sub>2</sub> rise, *Climate of the Past*, 7(3), 771-800, 2011.
- 1386 Tsujino, H., Urakawa, L. S., Griffies, S. M., Danabasoglu, G., Adcroft, A. J., Amaral, A. E.,  
1387 Arsouze, T., Bentsen, M., Bernardello, R., and Böning, C. W.: Evaluation of global ocean–sea-ice  
1388 model simulations based on the experimental protocols of the Ocean Model Intercomparison  
1389 Project phase 2 (OMIP-2), *Geoscientific Model Development*, 13(8), 3643-3708, 2020.
- 1390 Tsujino, H., Urakawa, S., Nakano, H., Small, R. J., Kim, W. M., Yeager, S. G., Danabasoglu, G.,  
1391 Suzuki, T., Bamber, J. L., and Bentsen, M.: JRA-55 based surface dataset for driving ocean–sea-  
1392 ice models (JRA55-do), *Ocean Modelling*, 130, 79-139, 2018.
- 1393 Van Drecht, G., Bouwman, A. F., Harrison, J., and Knoop, J. M.: Global nitrogen and phosphate  
1394 in urban wastewater for the period 1970 to 2050, *Global Biogeochemical Cycles*, 23(4), 2009.
- 1395 Van Drecht, G., Bouwman, A. F., Knoop, J. M., Beusen, A. H. W., and Meinardi, C. R.: Global  
1396 modeling of the fate of nitrogen from point and nonpoint sources in soils, groundwater, and surface  
1397 water, *Global Biogeochemical Cycles*, 17(4), 2003.
- 1398 Verchot, L. V., Davidson, E. A., Cattânio, H., Ackerman, I. L., Erickson, H. E., and Keller, M.:  
1399 Land use change and biogeochemical controls of nitrogen oxide emissions from soils in eastern  
1400 Amazonia, *Global Biogeochemical Cycles*, 13(1), 31-46, 1999.
- 1401 Walter, K., Don, A., Fuß, R., Kern, J., Drewer, J., and Flessa, H.: Direct nitrous oxide emissions  
1402 from oilseed rape cropping—a meta-analysis, *Gcb Bioenergy*, 7(6), 1260-1271, 2015.
- 1403 Wang, Q., Zhou, F., Shang, Z., Ciais, P., Winiwarter, W., Jackson, R. B., Tubiello, F. N., Janssens-  
1404 Maenhout, G., Tian, H., and Cui, X.: Data-driven estimates of global nitrous oxide emissions from  
1405 croplands, *National Science Review*, 7(2), 441–452, 2020.
- 1406 Wanninkhof, R.: Relationship between wind speed and gas exchange over the ocean, *Journal of*  
1407 *Geophysical Research: Oceans*, 97(C5), 7373-7382, 1992.
- 1408 Wanninkhof, R.: Relationship between wind speed and gas exchange over the ocean revisited,  
1409 *Limnology Oceanography: Methods*, 12(6), 351-362, 2014.

1410 Weiss, R. F., and Price, B. A.: Nitrous oxide solubility in water and seawater, *Marine Chemistry*,  
1411 8(4), 347-359, 1980.

1412 Wells, K. C., Millet, D. B., Bousserez, N., Henze, D. K., Chaliyakunnel, S., Griffis, T. J., Luan,  
1413 Y., Dlugokencky, E. J., Prinn, R. G., and O'Doherty, S.: Simulation of atmospheric N<sub>2</sub>O with  
1414 GEOS-Chem and its adjoint: evaluation of observational constraints, *Geoscientific Model  
1415 Development*, 8(10), 3179-3198, 2015.

1416 Wilson, C., Chipperfield, M. P., Gloor, M., and Chevallier, F.: Development of a variational flux  
1417 inversion system (INVICAT v1. 0) using the TOMCAT chemical transport model, *Geoscientific  
1418 Model Development*, 7(5), 2485-2500, 2014.

1419 Wollheim, W. M., Vörösmarty, C. J., Bouwman, A. F., Green, P., Harrison, J., Linder, E., Peterson,  
1420 B. J., Seitzinger, S. P., and Syvitski, J. P. M.: Global N removal by freshwater aquatic systems  
1421 using a spatially distributed, within-basin approach, *Global Biogeochemical Cycles*, 22(2), 2008.

1422 Xu-Ri, and Prentice, I. C.: Terrestrial nitrogen cycle simulation with a dynamic global vegetation  
1423 model, *Global Change Biology*, 14(8), 1745-1764, 2008.

1424 Xu, R., Tian, H., Lu, C., Pan, S., Chen, J., Yang, J., and Zhang, B.: Preindustrial nitrous oxide  
1425 emissions from the land biosphere estimated by using a global biogeochemistry model, *Climate of  
1426 the Past*, 13(7), 977-990, 2017.

1427 Xu, X., Sharma, P., Shu, S., Lin, T.-S., Ciais, P., Tubiello, F. N., Smith, P., Campbell, N., and Jain,  
1428 A. K.: Global greenhouse gas emissions from animal-based foods are twice those of plant-based  
1429 foods, *Nature Food*, 2(9), 724-732, 2021.

1430 Xu, X., Tian, H., Liu, M., Ren, W., Chen, G., Lu, C., and Zhang, C.: Multiple-factor controls on  
1431 terrestrial N<sub>2</sub>O flux over North America from 1979 through 2010, *Biogeosciences Discussions*,  
1432 8(6), 2011.

1433 Yang, H., Zhou, F., Piao, S., Huang, M., Chen, A., Ciais, P., Li, Y., Lian, X., Peng, S., and Zeng,  
1434 Z.: Regional patterns of future runoff changes from Earth system models constrained by  
1435 observation, *Geophysical Research Letters*, 44(11), 5540-5549, 2017.

1436 Yang, Q., Tian, H., Friedrichs, M. A. M., Hopkinson, C. S., Lu, C., and Najjar, R. G.: Increased  
1437 nitrogen export from eastern North America to the Atlantic Ocean due to climatic and  
1438 anthropogenic changes during 1901–2008, *Journal of Geophysical Research: Biogeosciences*,  
1439 120(6), 1046-1068, 2015.

1440 Yang, S., Chang, B. X., Warner, M. J., Weber, T. S., Bourbonnais, A. M., Santoro, A. E., Kock,  
1441 A., Sonnerup, R. E., Bullister, J. L., and Wilson, S. T.: Global reconstruction reduces the  
1442 uncertainty of oceanic nitrous oxide emissions and reveals a vigorous seasonal cycle, *Proceedings  
1443 of the National Academy of Sciences*, 117(22), 11954-11960, 2020.

1444 Yang, X., Wittig, V., Jain, A. K., and Post, W.: Integration of nitrogen cycle dynamics into the  
1445 Integrated Science Assessment Model for the study of terrestrial ecosystem responses to global  
1446 change, *Global Biogeochemical Cycles*, 23(4), 2009.

1447 Yao, Y., Tian, H., Shi, H., Pan, S., Xu, R., Pan, N., and Canadell, J. G.: Increased global nitrous  
1448 oxide emissions from streams and rivers in the Anthropocene, *Nature Climate Change*, 10(2),  
1449 138-142, 2020.

- 1450 Yao, Y., Tian, H., Xu, X., Li, Y., and Pan, S.: Dynamics and controls of inland water CH<sub>4</sub>  
1451 emissions across the Conterminous United States: 1860-2019, *Water Research*, 224, 119043,  
1452 2022.
- 1453 Yool, A., Martin, A. P., Fernández, C., and Clark, D. R.: The significance of nitrification for  
1454 oceanic new production, *Nature*, 447(7147), 999-1002, 2007.
- 1455 Zaehle, S., Ciais, P., Friend, A. D., and Prieur, V.: Carbon benefits of anthropogenic reactive  
1456 nitrogen offset by nitrous oxide emissions, *Nature Geoscience*, 4(9), 601-605, 2011.
- 1457 Zaehle, S., and Friend, A. D.: Carbon and nitrogen cycle dynamics in the O-CN land surface  
1458 model: 1. Model description, site-scale evaluation, and sensitivity to parameter estimates, *Global  
1459 Biogeochemical Cycles*, 24(1), 2010.
- 1460 Zamora, L. M., and Oschlies, A.: Surface nitrification: A major uncertainty in marine N<sub>2</sub>O  
1461 emissions, *Geophysical Research Letters*, 41(12), 4247-4253, 2014.
- 1462 Zhang, Y., Li, C., Zhou, X., and Moore III, B.: A simulation model linking crop growth and soil  
1463 biogeochemistry for sustainable agriculture, *Ecological Modelling*, 151(1), 75-108, 2002.
- 1464 Zhou, F., Shang, Z., Zeng, Z., Piao, S., Ciais, P., Raymond, P. A., Wang, X., Wang, R., Chen,  
1465 M., and Yang, C.: New model for capturing the variations of fertilizer-induced emission factors  
1466 of N<sub>2</sub>O, *Global Biogeochemical Cycles*, 29(6), 885-897, 2015.
- 1467 Zhou, J. B., Jiang, M. M., and Chen, G. Q.: Estimation of methane and nitrous oxide emission  
1468 from livestock and poultry in China during 1949–2003, *Energy Policy*, 35(7), 3759-3767, 2007.
- 1469 Zhu, Q., Riley, W. J., Tang, J., and Koven, C. D. : Multiple soil nutrient competition between  
1470 plants, microbes, and mineral surfaces: model development, parameterization, and example  
1471 applications in several tropical forests, *Biogeosciences*, 13(1), 341-363, 2016.
